# Supplementary material
Source: PubMed Central journal article supplement (PMC5409098)
Supplement: jci-127-84840-s001.pdf [file jci-127-84840-s001.pdf]

## **Supplemental Material**

### **New Genetic variants for Cardiac Structure and Function –**

#### **The EchoGen Consortium**

#### **Conflicts of interest**

The authors of this manuscript declare to have the following potential conflicts of interest according to JCI's policy:

**Ownership:** GFM: owner of Cardiovascular Engineering, Inc., a company that develops and manufactures devices to measure vascular stiffness;

**Income:** EI: advisor and consultant for Precision Wellness, Inc., and advisor for Cellink for work unrelated to the present project; GFM: consultant to and receives honoraria from Novartis, Merck, Servier and Philips; PSW: honoraria for lectures or consulting from Boehringer Ingelheim, Bayer Health Care, AstraZeneca, Sanofi-Aventis and Public Health, Heinrich-Heine-University Düsseldorf. SB: honoraria for lectures from Abbott, Abbott Diagnostics, Astra Zeneca, Bayer, Boehringer Ingelheim, Medtronic, Pfizer, Roche, SIEMENS Diagnostics, SIEMENS, Thermo Fisher and member of Advisory Boards and consultant for Boehringer Ingelheim, Bayer, Novartis, Roche and Thermo Fisher. SJS: consulting fees from Bayer, Novartis, and Sanofi.,

**Research support:** AZ: research support from BiomarCaRE (EU) and DZHK (BMBF); CAM: >50K-NIH, Burroughs Wellcome Foundation, Leducq Foundation, AHA, Google, AstraZeneca, Merck, Sanofi; EJB received NI grant support 1R01HL128914, 2R01 HL092577. GFM: research grant from Novartis and by research grants HL094898,

DK082447, HL107385, HL104184 and HL126136 from the National Institutes of Health; PSW, KL, TM: research grant from Boehringer Ingelheim (grant for the conduct of the Gutenberg Health Study); SJS: research grant support from Actelion, AstraZeneca, and Novartis; SB: research funding from Abbott, Abbott Diagnostics, Bayer, Boehringer Ingelheim, SIEMENS and Thermo Fisher; TZ: research grant by the German Federal Ministry of Education and Research (BMBF) to the German Center for Cardiovascular Disease (DZHK) (81Z1710101). PSW: research grant by the Federal Ministry of Education and Research (BMBF 01EO1003 and 01EO1503), German Federal Ministry of Education and Research (BMBF) to the German Center for Cardiovascular Disease (DZHK) (81Z1710101), Federal Institute for Occupational Safety and Health (BAuA), DFG no. WI 3881/2-2; EU Grants No. 278913, 278397, Initiative “Health Economy”, Ministry of Health and Ministry of Economics, and Federal Ministry of Education and Research, Rhineland-Palatinate; Mainz Heart Foundation, Boehringer Ingelheim, Sanofi-Aventis, Bayer Health Care, Daiichi Sankyo Europe.

**Intellectual property:** Not applicable.

**Online Methods and Supplemental Material:**  
**New Genetic variants for Cardiac Structure and Function –**  
**The EchoGen Consortium**

|     |                                                                    |    |
|-----|--------------------------------------------------------------------|----|
| 1   | ONLINE METHODS .....                                               | 2  |
| 1.1 | Echocardiographic Methods.....                                     | 2  |
| 1.2 | Methods used for look-up in other cohorts .....                    | 6  |
| 1.3 | Pathway Analysis .....                                             | 11 |
| 2   | SUPPLEMENTAL MATERIAL .....                                        | 14 |
| 2.1 | Abbreviations of participating cohorts .....                       | 14 |
| 2.2 | Description of cohorts (Table S1).....                             | 15 |
| 2.3 | Baseline characteristics of cohorts (Table S2).....                | 18 |
| 2.4 | Echo methods (Table S3) .....                                      | 21 |
| 2.5 | Echo values by cohorts (Table S4) .....                            | 22 |
| 2.6 | Genotyping Methods and Imputation (Table S5) .....                 | 24 |
| 3   | Additional tables and figures (Table S6-S19, Figures S1-S20) ..... | 28 |
| 4   | Acknowledgements.....                                              | 72 |
| 5   | References.....                                                    | 88 |

## **1 ONLINE METHODS**

### **1.1 Echocardiographic Methods**

#### **1.1.1 Harmonization and quality issues**

An important issue for meta-analysis of data from different cohorts is the compliance with high quality phenotyping standards. Echocardiographic data used for these analyses were recorded for research but not taken from clinical routine. For echocardiography potential sources of variability have been identified and described previously<sup>1</sup>, including inter- and intra-reader and sonographer variability, within subject variability, temporal drift within laboratories, and biases due to missing data<sup>2,3</sup>. Methods that have previously demonstrated to enhance echo reproducibility have been applied by the participating cohorts of the EchoGen consortium at each study site, standardized equipment and imaging and reading protocols, trained sonographers and readers who periodically undergo reading review sessions, averaging multiple measurements, substituting 2D measurements when M-mode measurements are unreliable, assessment of intra-reader and inter-reader agreement, and analyses of temporal drifts<sup>1,3-6</sup>.

#### **1.1.2 Echo examinations, parameters and definitions**

Transthoracic echocardiography was performed in each cohort by trained technicians or physicians. All measurements were performed according to the current American and European guidelines for the echocardiographic assessment of the left ventricle<sup>7</sup>. For the present investigation we analyzed 5 LV structural, 2 systolic functional, and 7 diastolic functional parameters, as well as 2 binary diastolic traits.

– **LV structural parameters:**

Two-dimensional guided M-mode measurements of the parasternal long axis view of the LV and aortic root were obtained:

- ***LV diastolic internal dimension (LVDD)***
- ***LV wall thickness (LVWT)***, calculated as the sum of posterior wall and interventricular septum measurements
- ***LV mass (LVM)***, calculated by using the formula  $0.8 [1.04\{(\text{LV diastolic internal dimension} + \text{interventricular septum} + \text{posterior wall})^3 - (\text{LV diastolic internal dimension})^3\}] + 0.6$  <sup>7,8</sup>
- ***Left atrial antero-posterior diameter (LA)***
- ***Aortic root diameter (AoD)*** , diameter of the aortic root (at the maximal diameter of the sinuses of Valsalva), obtained from the parasternal long-axis view<sup>7</sup>
- **LV systolic function parameters:**

Also from the parasternal long axis view the following variables were obtained:

- ***Left ventricular fractional shortening (FS)***, a quantitative measure of LV systolic function, calculated using the formula  $([\text{LV end diastolic dimension} - \text{LV end systolic dimension}] / \text{LV end diastolic dimension} \times 100)$
- ***LV systolic dysfunction (LVSD)***, defined as the presence of reduced fractional shortening (<29%, which corresponds to an ejection fraction of 50%) on M-mode or a diminished ejection fraction (<50%) on 2-dimensional echocardiography<sup>9</sup>. If a cohort only had categorical data on systolic dysfunction available, for example a categorical visual estimate of LV function, these were recoded into a binary variable best representing the cut-offs above.

– **LV diastolic functional parameters:**

For the analyses of all LV diastolic functional parameters only subjects with a preserved LV ejection fraction (EF) were considered, defined according one of the following methods (method 1 preferred): 1. EF (modified Simpson method)  $\geq 50\%$ ; 2. EF (Teichholz method)  $\geq 50\%$ ; 3. Fractional shortening  $\geq 29\%$ ; 4. Visual estimation of EF as fair or poor. Further details about the application of the different methods by cohorts is given in **Supplemental Material Online, Table S 3**.

From the apical 4-chamber view the following variables were obtained by Doppler imaging of the mitral inflow:

- ***Peak velocity of the mitral E-wave (Mv-E)***
- ***Peak velocity of the mitral A-wave (Mv-A)***
- ***Ratio of the peak velocity of the mitral E-Wave divided by the peak velocity of the mitral A-wave.*** This ration was determined during breathing baseline in all cohorts (***E/A***) and during Valsalva maneuver in some cohorts (***E/A\_val***).
- ***Deceleration time of the mitral E-wave (DecTime)***

In addition, a pulse-wave Doppler imaging was obtained from the apical 5-chamber or long-axis view and the sample volume placed within the LVOT, but in proximity to the anterior mitral valve leaflet to record both inflow and outflow signals and measure the following parameter:

- ***Isovolumetric relaxation time (IVRT)***, an additional index of diastolic function, defined as the interval from the closure of the aortic valve to the opening of the mitral valve.

Moreover, tissue Doppler imaging (TDI) was applied in some cohorts to obtain the following diastolic parameters:

- ***Peak velocity of the excursion of the lateral mitral annulus in the early diastolic phase (E')***
- ***Ratio of the peak velocity of the excursion of the lateral mitral annulus in the early diastolic phase by TDI and the peak velocity of the mitral E-wave by Doppler imaging (E/E')***

Alternative to TDI Doppler imaging of the pulmonary venous inflow was used in some cohorts to achieve these parameters: systolic pulmonary venous forward flow (S), diastolic pulmonary venous forward flow (D), and ratio of systolic and diastolic pulmonary venous flow (S/D).

– **Binary diastolic LV traits:**

For the definition of these variables the classification of diastolic function by *Redfield et al.* was applied<sup>10</sup>. Measurement of diastolic function was based on Doppler imaging of the mitral inflow and either TDI of the mitral annulus or Doppler imaging of the pulmonary venous inflow in combination with E/A<sub>val</sub> measured by Doppler imaging of the mitral inflow.

The following binary diastolic traits were calculated:

- ***Diastolic Dysfunction with preserved ejection fraction (DDpEF)***: Cases were defined by an EF  $\geq$  50%, no symptoms of heart failure, no medicated

heart failure AND evidence for mild, moderate or severe LV diastolic dysfunction. Controls were defined by an EF  $\geq$  50%, no symptoms of heart failure, no medicated heart failure AND a normal LV diastolic function.

- ***Heart Failure with preserved ejection fraction – definition (HFpEF):*** Cases were defined by an EF  $\geq$  50%, symptoms of heart failure (NYHA class  $\geq$  2) AND/OR medicated heart failure AND evidence for mild, moderate or severe LV diastolic dysfunction. Controls were asymptomatic individuals with preserved systolic and diastolic LV function defined as an EF  $\geq$  50%, no symptoms of heart failure, no medicated heart failure AND normal LV diastolic function.

Participants with valvular disease were excluded from the analyses of left ventricular dimensions and systolic function, if this information was known or recorded during the echocardiographic examination. Detailed echocardiographic methods used and distributions of traits in each cohort study are reported in the **Supplemental material, Tables S3 and S4.**

## **1.2 Methods used for look-up in other cohorts**

### **AortaGen**

To determine whether SNPs that were associated with aortic diameter were also associated with aortic stiffness, as assessed by carotid-femoral pulse wave velocity, we evaluated the top SNP from each of the 7 novel aortic diameter loci. Lookups were derived from a previously published meta-analysis of genome wide association results for carotid-femoral pulse wave velocity from 9 cohorts that included 20,634

participants<sup>11</sup>. After accounting for 7 tests, the adjusted threshold for significance was set at a  $P$  values  $< 0.007$ .

### **CHARGE-HF**

The association of the two novel SNPs for left ventricular diastolic diameter with incident heart failure was assessed using the summary statistics of the meta-analysis of four population-based cohorts of adults of European ancestry (Cardiovascular Health Study, Framingham Heart Study, Atherosclerosis Risk In Communities Study and Rotterdam Study) including a total of 20,926 participants free of diagnosed heart failure at baseline, in whom 2,526 cases of incident heart failure occurred during a mean follow-up of 11.5 years<sup>12</sup>. There is partial overlap between the samples of the Cardiovascular Health Study, the Framingham Heart Study and the Rotterdam Study included in CHARGE-HF and in the present study.

### **Generation R Study**

The Generation R Study is a population-based, prospective cohort study from fetal life onwards, including pregnant women with an expected delivery date between April 2002 and January 2006, living in the city of Rotterdam, the Netherlands. A detailed description of the design of study has been published previously<sup>12</sup>. DNA was extracted from cord blood, or, if cord blood was unavailable, from blood samples taken at the 6-year visit, according to a standardized protocol.

Information on SNPs used in the present analysis was extracted from the GWAs database, details of which are described in the supplemental material of this paper. Analyses were restricted to singleton, live born children of European ethnic origin without congenital heart or kidney malformations, in whom echocardiography was

performed during the follow-up at age 6. Analyses were adjusted for age, sex, height, weight and the first four principal components based on the GWAs data.

## **LURIC**

The Ludwigshafen Risk and Cardiovascular Health (LURIC) study is an ongoing prospective study of more than 3,300 individuals of German ancestry in whom cardiovascular and metabolic phenotypes (CAD, MI, dyslipidemia, hypertension, metabolic syndrome and diabetes mellitus) have been defined or ruled out using standardized methodologies in all study participants. Inclusion criteria for LURIC were: German ancestry (limitation of genetic heterogeneity), clinical stability (except for acute coronary syndromes) and availability of a coronary angiogram. Exclusion criteria were: any acute illness other than acute coronary syndromes, any chronic disease where non-cardiac disease predominated and a history of malignancy within the last five years. A 10-year clinical follow-up for total and cause specific mortality has been completed. Participants were genotyped using the Affymetrix 6.0 array and datasets were imputed to the HapMap2 and 1000G reference panels. Association of SNPs with all-cause mortality, cardiovascular mortality and death due to heart failure was analyzed using the Cox proportional hazards model.

## **CARDIOGRAMPLUSC4D**

The associations of the novel SNPs with myocardial infarction and coronary artery disease were looked up in the publicly available dataset of the CARDIOGRAMplusC4D Consortium, including more than 180,000 individuals of which 60,000 are cases of coronary artery disease and myocardial infarction [downloaded from [www.CARDIOGRAMPLUSC4D.org](http://www.CARDIOGRAMPLUSC4D.org)] <sup>13</sup>. The results of the additive models were used.

### **1.2.1 Human left ventricle tissue**

Samples of cardiac tissue (n=313) were acquired from patients from the Myocardial Applied Genomics Network (MAGNet; [www.med.upenn.edu/magnet](http://www.med.upenn.edu/magnet)). Left ventricular free-wall tissue was harvested at the time of cardiac surgery from subjects with heart failure undergoing transplantation and from unused donor hearts. The heart was perfused with cold cardioplegia prior to cardiectomy to arrest contraction and prevent ischemic damage. Tissue specimens were then obtained and frozen in liquid nitrogen. Genomic DNA was extracted using the Gentra Puregene Tissue Kit (Qiagen, CA) according to manufacturer's instructions. Total RNA was extracted using the miRNeasy Kit (Qiagen) including DNase treatment. RNA concentration and quality was determined using the NanoVue Plus™ spectrophotometer (GE Healthcare) and the Agilent 2100 RNA Nano Chip (Agilent).

DNA samples were genotyped using Affymetrix Genome Wide SNP Array 6.0. We applied quality control (QC) filters to exclude unreliable samples, samples with cryptic relatedness and samples that were not genetically inferred Caucasian. For the analysis reported here, we eliminated SNPs with genotype call rate < 95%, with minor allele frequency (MAF) < 15%, or if there was significant departure from Hardy-Weinberg equilibrium ( $p < 10^{-6}$ ). A total of 360,046 SNPs passed QC and were available for analysis. To improve cross study comparisons, genotype imputation was performed using the Minimac (v 2012.11.16) program<sup>14</sup>. Imputation results were filtered at an imputation quality threshold of 0.5 and a MAF threshold of 0.15. For imputed genotypes, we used dosage value as genotype. To assess gene expression, RNA was hybridized with Affymetrix Genechip ST1.1 arrays using manufacturer instructions. CEL

files were normalized with robust multiarray analysis (RMA) using Bioconductor<sup>15</sup>. To remove potential batch effects, expression values were further adjusted using ComBat<sup>16</sup>.

We tested whether an association existed between the genotype of the 41 echocardiographic trait SNPs and gene expression of proximal (or neighboring) genes. A *cis* eQTL analysis was performed using transcripts +/- 1Mb from each of the 41 SNPs using a linear regression model and adjusted for multiple comparisons using a Bonferroni correction (total of 687 SNP-transcript association tests examined). Our analysis used a joint-effects model that allowed for different strengths of association in comparatively healthy hearts from unused donors versus those with end-stage heart failure. Specifically, we fit linear regression models,  $Y = \text{age} + \text{sex} + \text{study site} + D + \beta_1(g) + \beta_2(g \times D)$ , where  $Y$  is the log2 transformed expression level of a given expression trait,  $g$  is the dosage value of the test SNP, and  $D$  is the patient group ( $D = 1$  for heart failure and  $D = 0$  for unused donors). Association between  $Y$  and  $g$  was assessed by testing  $H_0: \beta_1 = \beta_2 = 0$  using a likelihood ratio test. Significance of the test statistic was evaluated by comparing with a Chi-squared distribution with two degrees of freedom. We considered  $P < 7.50 \times 10^{-5}$  ( $0.05/687$  tests) to be statistically significant. To test whether statistically significant associations were likely to be mediated through the strongest eSNPs in the region, we fit analogous models that conditioned on genotypes for the strongest observed *cis* eSNP for each transcript. Echocardiographic SNPs that showed substantial attenuation of the strength of association with a specific transcript upon adjustment for the best eSNP for that transcript suggest that the

echocardiographic trait association is mediated by influence of the causal variant (not necessarily the SNP identified) on expression of that gene.

### **1.2.2 Whole blood**

In 5,311 human whole blood samples of the results of Westra et al.<sup>17</sup>, all transcripts of which the center of the corresponding array probe is located within 250 kb of the SNP position were correlated with each replicated SNP.

### **1.2.3 Monocytes**

In an expression dataset of human monocytes from 1,372 participants of the GHS<sup>18</sup>, relation of SNPs to the gene expression was calculated by linear regression assuming an additive model adjusted for sex and age. A *cis* association was defined as an association with expression levels of a gene at 250 kb up- or downstream of the SNP position. A significance threshold of 0.001 (Bonferroni correction of  $P = 0.01$  for 10 tests) was used to adjust for multiple testing.

## **1.3 Pathway Analysis**

The collective effects of multiple genetic variants on biological systems were investigated by pathway analysis. For each of the ~2.5 million tested SNPs, we assigned an overall score to indicate its association with echo-related traits, which was equivalent to the most significant p-value among the seven structural and systolic traits. These genetic variants were then mapped back to the human reference genome (NCBI Build 36, 2006) and we examined their locations relative to RefSeq genes (Mar 17, 2013). We took a region of 110kb upstream to 40kb downstream of each gene's transcript boundaries and determined SNP with the lowest score within that region<sup>19</sup>. Of

the 23,696 genes evaluated, 379 reached a score less than  $1.0 \times 10^{-5}$ . These genes were then imported into Ingenuity IPA for pathway analysis (Ingenuity Systems, Redwood, CA). Fisher's exact test was used to justify the enrichment of each of the canonical pathways, and false discovery rate (FDR) was used to adjust for multiple testing<sup>20</sup>. Our analysis reveals that four canonical pathways were significantly enriched (FDR<0.05) with echo related genes, including the protein kinase A signaling pathway, death receptor Signaling, the Wnt/Ca<sup>+</sup> pathway and the P2Y purigenic receptor signaling pathway. The results suggest that the disruption of these signaling pathways might be the potential mechanisms affecting echo traits.

We also combined the association with both systolic and diastolic traits, and performed pathway analysis. Protein kinase A signaling remained the most significant pathway in the combined analysis ( $P$  value:  $5.9 \times 10^{-7}$ ). The other three pathways, death receptor signaling pathway ( $P$  value:  $2.2 \times 10^{-3}$ ), Wnt/Ca<sup>+</sup> pathway ( $P$  value:  $2.8 \times 10^{-3}$ ), and P2Y purigenic receptor signaling pathway ( $P$  value:  $1.0 \times 10^{-2}$ ), also retained nominal significance although p-values were attenuated. None of the pathways reached the FDR cutoff for the diastolic traits alone.

We then examined the interactions between the top echo-related loci by DAPPLE<sup>21</sup>. Variants with  $P$  value less than  $5 \times 10^{-7}$  were used as the input of DAPPLE software, which then built both direct and indirect interaction networks from seed genes nearby the top loci. No significant interactions were found between loci ( $P$  value: 0.68 for direct interactions, and  $P$  value: 0.51 for indirect interactions). The analysis by SNIPPER (<http://csg.sph.umich.edu/boehnke/snipper/>) did not find direct interactions between the top echo-related loci.

The potential regulatory effect of the top loci was also investigated using all tissue types represented in the ENCODE data<sup>22</sup>. Seven loci were found be located within enhancer histone marks (rs1454157, rs10774625, rs6702619, rs1532292, rs17608766, rs11207426, and rs9470361). In addition, seven loci were located within DNase hypersensitive sites in multiple cell lines, suggesting that these loci might be involved into important regulatory processes in different developmental stages.

We also used the DEPICT tool to further explore functionality of the identified SNPs<sup>23</sup>. SNPs within the major histocompatibility complex region were excluded (chromosome 6, base pairs 25,000,000 through 35,000,000). LD  $r^2 > 0.5$  distance was used to define locus boundaries yielding 54 loci for AoD and 27 loci for LVD comprising 83 and 55 genes, respectively. DEPICT was run using default settings, that is using 500 permutations for bias adjustment, 20 replications for false discovery rate estimation, normalized expression data from 77,840 Affymetrix microarrays for gene set reconstitution (see ref.<sup>24</sup> for details), 14,461 reconstituted gene sets for gene set enrichment analysis, and testing 209 tissue/cell types assembled from 37,427 Affymetrix U133 Plus 2.0 Array samples for enrichment in tissue/cell type expression.

## 2 SUPPLEMENTAL MATERIAL

### 2.1 Abbreviations of participating cohorts

|                         |                                                                                            |
|-------------------------|--------------------------------------------------------------------------------------------|
| <b>AortaGen</b>         | AortaGen Consortium                                                                        |
| <b>AGES</b>             | Age, Gene/Environment Susceptibility                                                       |
| <b>ASCOT</b>            | Anglo-Scandinavian Cardiac Outcomes Trial                                                  |
| <b>ASPS</b>             | Austrian Stroke Prevention Study                                                           |
| <b>CARDIA</b>           | Coronary Artery Risk Development in Young Adults                                           |
| <b>CARLA</b>            | Cardiovascular Disease, Living and Ageing in <i>Halle</i>                                  |
| <b>CHARGE-HF</b>        | Cohorts for Heart and Aging Research in Genomic Epidemiology – Heart Failure Working Group |
| <b>CHS</b>              | Cardiovascular Health Study                                                                |
| <b>Cilento</b>          | Genetic Park of Cilento and Vallo di Diano Project                                         |
| <b>FHS1, FHS2, FHS3</b> | Framingham Heart Study, original cohort, offspring and third generation cohorts            |
| <b>Generation R</b>     | Generation R Study                                                                         |
| <b>GHS-I, -II, -III</b> | Gutenberg Health Study, waves 1-3                                                          |
| <b>HyperGEN</b>         | Hypertension Genetic Epidemiology Network                                                  |
| <b>JHS</b>              | Jackson Heart Study                                                                        |
| <b>KNHI</b>             | Kompetenznetz Herzinsuffizienz (Competence Network Heart Failure)                          |
| <b>KORA-F3, -F4</b>     | Cooperative Health Research in the Region of Augsburg, waves 3 and 4                       |
| <b>LURIC</b>            | Ludwigshafen Risk and Cardiovascular Health Study                                          |
| <b>MICROS</b>           | Microisolates in South Tyrol Study                                                         |
| <b>MPP</b>              | Malmö Preventive Project                                                                   |
| <b>NOMAS</b>            | Northern Manhattan Study                                                                   |
| <b>PIVUS</b>            | Prospective Investigation of the Vasculature in Uppsala Seniors                            |
| <b>RSI, -II, -III</b>   | Rotterdam Study, subcohorts 1-3                                                            |
| <b>SHIP</b>             | Study of Health in Pomerania                                                               |
| <b>SHIP-Trend</b>       | Study of Health in Pomerania, independent baseline cohort                                  |
| <b>ULSAM</b>            | Uppsala Longitudinal Study of Adult Men                                                    |
| <b>YFS</b>              | The Cardiovascular Risk in Young Finns Study                                               |

## 2.2 Description of cohorts (Table S1)

**Table S 1: General cohort descriptives**

| Cohort / study          | Study Design                                   | Total sample size of cohort                  | Country         | Inclusion / exclusion criteria for this analysis                                                                                                                                           | Reference        |
|-------------------------|------------------------------------------------|----------------------------------------------|-----------------|--------------------------------------------------------------------------------------------------------------------------------------------------------------------------------------------|------------------|
| <b>AGES</b>             | Population-based                               | 5,660                                        | Iceland         | Sample exclusion criteria included sample failure, genotype mismatch with reference panel, and sex mismatch, resulting in clean genotype data on 3,219 individuals.                        | <sup>25</sup>    |
| <b>ASCOT</b>            | Substudy of ASCOT clinical trial (ASCOT-HACVD) | 885                                          | Ireland, UK     | Samples with CNV370 genotype data and part of the ASCOT-HACVD study were included in the study. Samples with genotype call rate <95% were excluded from the genetic association study.     | <sup>26</sup>    |
| <b>ASPS</b>             | Community-based prospective cohort study       | 2,007                                        | Austria         | Non-European ancestry not included, sample failures, genotyped sex different from recorded sex                                                                                             | <sup>27</sup>    |
| <b>CARDIA</b>           | Prospective Cohort Study                       | 5,115                                        | US              | Non-caucasian participants excluded                                                                                                                                                        | <sup>28</sup>    |
| <b>CARLA</b>            | Prospective, population-based                  | 1,779                                        | Germany         | Subjects with successful genotyping and available echocardiography measurements, exclusion of subjects of the baseline examination (2002-2006) due to missing echocardiographic variables. | <sup>29</sup>    |
| <b>CHS</b>              | Prospective, population-based                  | 5,888                                        | US              | Samples in this analysis were limited to those of European ancestry, those with successful genotyping and available echocardiography measurements.                                         | <sup>30</sup>    |
| <b>Cilento</b>          | Cross-sectional Isolated Population Study      | 2,137                                        | Italy           | Echocardiography and genotyping data available                                                                                                                                             | <sup>31,32</sup> |
| <b>FHS1</b>             | Prospective family-based                       | 5,209                                        | US              | Echo available and person free of MI and CHF at exam cycle 20.                                                                                                                             | <sup>33</sup>    |
| <b>FHS2</b>             | Prospective family-based                       | 5,124                                        | US              | Echo available and person free of MI and CHF for at least two exam cycles (2,4,5,6).                                                                                                       | <sup>34</sup>    |
| <b>FHS3</b>             | Prospective family-based                       | 4,095                                        | US              | Free of MI and CHF with echo data available at exam 1.                                                                                                                                     | <sup>35</sup>    |
| <b>Generation R</b>     | Population-based cohort                        | 9,901                                        | The Netherlands | Inclusion: Caucasian, live birth, Exclusion: twins                                                                                                                                         | <sup>12</sup>    |
| <b>GHS-I, -II, -III</b> | Population-based                               | GHS-I 3,192<br>GHS-II 1,179<br>GHS-III 9,750 | Germany         | Missing echocardiographic traits or genetic data                                                                                                                                           | <sup>36</sup>    |
| <b>HyperGEN</b>         | Population-based family study                  | 2,407                                        | US              | Samples in this analysis were restricted to Caucasian families.                                                                                                                            | <sup>37</sup>    |

# Supplemental Material: New Genetic variants for Cardiac Structure and Function – EchoGen

**Table S 1, continued**

| Cohort / study | Study Design                                                                                                    | Total sample size of cohort | Country         | Inclusion / exclusion criteria for this analysis                                                                                                                                                                                                                                                                                           | Reference |
|----------------|-----------------------------------------------------------------------------------------------------------------|-----------------------------|-----------------|--------------------------------------------------------------------------------------------------------------------------------------------------------------------------------------------------------------------------------------------------------------------------------------------------------------------------------------------|-----------|
| <b>JHS</b>     | Prospective and Community based study                                                                           | 3,029                       | US              | Missing Echocardiographic traits in the first examination visit (2000-2004)                                                                                                                                                                                                                                                                | 38        |
| <b>KNHI</b>    | Prospective population-based cohort at high CV risk                                                             | 1,732                       | Germany         | Excluded were:<br>1) atrial fibrillation at investigation<br>2) Non-Caucasian, sex mismatch, relatedness to other study participant, individual call rate < 90%                                                                                                                                                                            | 39        |
| <b>KORA-F3</b> | Population-based                                                                                                | 3006                        | Germany         | participants between 35 and 79 years with echocardiograms, genome-wide association data and free of prevalent MI and CHF (n=589)                                                                                                                                                                                                           | 40-42     |
| <b>KORA-F4</b> | Population-based                                                                                                | 4,261                       | Germany         | Participants between 25 and 74 years with echocardiograms, genome-wide association data and free of prevalent MI and CHF (n=373)                                                                                                                                                                                                           | 40-42     |
| <b>LURIC</b>   | Case-control                                                                                                    | 3,316                       | Germany         | Availability of genotypes                                                                                                                                                                                                                                                                                                                  | 43        |
| <b>MICROS</b>  | Population-based                                                                                                | 1,340                       | Italy           | None                                                                                                                                                                                                                                                                                                                                       | 44        |
| <b>MPP</b>     | Prospective population-based cohort, with oversampling of subjects with impaired glucose tolerance and diabetes | 1,791                       | Sweden          | Echocardiography and DNA available.                                                                                                                                                                                                                                                                                                        | 45        |
| <b>NOMAS</b>   | Population-based incidence and case-control study                                                               | 3,298                       | US              | Samples with call rate ≤95%, mismatch between genotyped gender and self-reported gender, genetic ancestry outliers (samples beyond 6 SD from the mean of PC1-10 in each racial group), and one from each pair of samples with PI_HAT ≥0.25 were removed from analysis.                                                                     | 46        |
| <b>PIVUS</b>   | Prospective population-based study                                                                              | 1,016                       | Sweden          | Sample call rate <95%, genotype heterozygosity > +3 standard deviations, gender discordance, and duplicates.                                                                                                                                                                                                                               | 47        |
| <b>RS-I</b>    | Prospective population-based cohort study                                                                       | 7,983                       | the Netherlands | Inclusion: Availability of GWAs data and phenotype data. Exclusion: Sample call rate < 97.5%, excess autosomal heterozygosity, mismatch between called and phenotypic gender, ethnic outliers identified by the IBS clustering analysis with >4 standard deviations from population mean or IBS probabilities >97%, familiar relationships | 48        |
| <b>RS-II</b>   | Prospective population-based cohort study                                                                       | 3,011                       | the Netherlands | Inclusion: Availability of GWAs data and phenotype data. Exclusion: Sample call rate < 97.5%, excess autosomal heterozygosity, mismatch between called and phenotypic gender, ethnic outliers identified by the IBS clustering analysis with >4 standard deviations from population mean or IBS probabilities >97%, familiar relationships | 48        |

Table S 1, continued

| Cohort / study    | Study Design                              | Total sample size of cohort    | Country         | Inclusion / exclusion criteria for this analysis                                                                                                                                                                                                                                                                                           | Reference     |
|-------------------|-------------------------------------------|--------------------------------|-----------------|--------------------------------------------------------------------------------------------------------------------------------------------------------------------------------------------------------------------------------------------------------------------------------------------------------------------------------------------|---------------|
| <b>RS-III</b>     | Prospective population-based cohort study | 3,932                          | the Netherlands | Inclusion: Availability of GWAs data and phenotype data. Exclusion: Sample call rate < 97.5%, excess autosomal heterozygosity, mismatch between called and phenotypic gender, ethnic outliers identified by the IBS clustering analysis with >4 standard deviations from population mean or IBS probabilities >97%, familiar relationships | <sup>48</sup> |
| <b>SHIP</b>       | Prospective population-based study        | 4308 (SHIP-0)<br>3300 (SHIP-1) | Germany         | Excluded arrays with CallRate < 92%, duplicate samples (by estimated IBD) and individuals with reported/genotyped gender mismatch. For diastolic analyses data from the first 5-year follow-up were used (3300 total sample / 2400 with echo and genotyping data).                                                                         | <sup>49</sup> |
| <b>SHIP-Trend</b> | Prospective population-based study        | 4,420                          | Germany         | Excluded arrays with CallRate < 94%, duplicate samples (by estimated IBD) and individuals with reported/genotyped gender mismatch                                                                                                                                                                                                          | <sup>49</sup> |
| <b>ULSAM</b>      | Prospective population-based study        | 1,221                          | Sweden          | Sample call rate <95%, genotype heterozygosity > +-3 standard deviations, gender discordance, and duplicates.                                                                                                                                                                                                                              | <sup>50</sup> |
| <b>YFS</b>        | Prospective population-based study        | 2,063                          | Finland         | Genotyping sample call rate < 95 %, excess heterozygosity, duplicates, cryptic relatedness, MDS outliers , gender mismatch                                                                                                                                                                                                                 | <sup>51</sup> |

## 2.3 Baseline characteristics of cohorts (Table S2)

**Table S 2: Selected characteristics of participants**

| Cohort / study                   | AGES          | ASCOT         | ASPS          | CARDIA        | CHS           | FHS           |               | FHS-3           | GHS-I      | GHS-II     | GHS-III    | HyperGEN   |
|----------------------------------|---------------|---------------|---------------|---------------|---------------|---------------|---------------|-----------------|------------|------------|------------|------------|
| Age, y mean (SD)                 | 76 (6)        | 64 (8)        | 66 (8)        | 31 (3)        | 75 (5)        | 74.9<br>(4.9) | 51.7<br>(9.7) | 40.16<br>(8.86) | 56 (11)    | 55 (11)    | 55 (11)    | 50 (14)    |
| Age range, y                     | 67-95         | 40-80         | 49-90         | 22-37         | 65-96         | 68-93         | 26-79         | 19-72           | 35-74      | 36-74      | 35-74      | 18 - 87    |
| Female sex, No. (%)              | 315 (57)      | 336 (22)      | 462 (57)      | 849 (53)      | 1981<br>(60)  | 430 (60)      | 1746<br>(54)  | 2050<br>(53.1)  | 1558 (49)  | 590 (50)   | 4797 (49)  | 639 (50.4) |
| Height, cm mean (SD)             | 167 (10)      | 170 (9)       | 166 (9)       | 171 (9)       | 164 (9)       | 162 (10)      | 168 (9)       | 171 (9)         | 171 (9)    | 169 (10)   | 170 (10)   | 170 (9)    |
| Weight, kg mean (SD)             | 75 (14)       | 85 (15)       | 73 (13)       | 73 (16)       | 72 (14)       | 70 (14)       | 76 (16)       | 79 (19)         | 79 (16)    | 79 (17)    | 80 (17)    | 85 (19)    |
| BMI, kg/m <sup>2</sup> mean (SD) | 26.9<br>(4.2) | 29.4<br>(4.7) | 26.8<br>(4.1) | 24.9<br>(4.6) | 26.4<br>(4.4) | 26.7<br>(4.4) | 26.9<br>(4.7) | 26.9 (5.5)      | 27.2 (4.8) | 27.3 (5.0) | 27.5 (5.1) | 29.4 (6.1) |
| Obesity, No (%)                  | 110 (20)      | 336 (38)      | 154 (19)      | 189 (12)      | 568 (17)      | 138 (19)      | 593 (18)      | 877 (23)        | 761 (24)   | 298 (25)   | 2516 (26)  | 513 (40.4) |
| Systolic BP, mmHg mean (SD)      | 143 (21)      | 135 (11)      | 143 (22)      | 106 (11)      | 133<br>(20)   | 147 (23)      | 125 (15)      | 117 (14)        | 134 (18)   | 131 (17)   | 131 (17)   | 123.5 (19) |
| Hypertension, No. (%)            | 430 (78)      | 885<br>(100)  | 281 (34)      | 63 (4)        | 1512<br>(47)  | 524 (74)      | 870 (27)      | 718 (19)        | 1692 (53)  | 570 (48)   | 4786 (49)  | 659 (52)   |
| Smoking, No. (%)                 | 59 (11)       | 207 (23)      | 95 (11)       | 350 (22)      | 221 (7)       | 74 (10)       | 619 (20)      | 671 (17)        | 585 (18)   | 249 (21)   | 1910 (20)  | 116 (9)    |
| Diabetes, No. (%)                | 72 (13)       | 165 (19)      | 74 (9)        | 30 (2)        | 272 (8)       | 42 (6)        | 130 (4)       | 116 (3)         | 237 (7)    | 90 (8)     | 735 (8)    | 165 (13)   |

**Supplemental Material: New Genetic variants for Cardiac Structure and Function – EchoGen**

**Table S 2, continued**

| <b>Cohort / study</b>                  | <b>KNHI</b> | <b>KORA-F3</b> | <b>KORA-F4</b> | <b>MICROS</b> | <b>PIVUS</b> | <b>RS-I</b> | <b>RS-II</b> | <b>RS-III</b> | <b>SHIP</b> | <b>SHIP-Trend</b> | <b>ULSAM</b> |
|----------------------------------------|-------------|----------------|----------------|---------------|--------------|-------------|--------------|---------------|-------------|-------------------|--------------|
| <b>Age, y mean (SD)</b>                | 64 (9)      | 62 (10)        | 58 (8)         | 46 (17)       | 75 (0)       | 75 (6)      | 68 (7)       | 56 (6)        | 54 (6)      | 50 (14)           | 71 (1)       |
| <b>Age range, y</b>                    | 50-85       | 35-79          | 25-74          | 19-83         | 75-76        | 65-99       | 58-98        | 46-97         | 25-86       | 20-81             | 69.7-73.3    |
| <b>Female sex, No. (%)</b>             | 315 (56)    | 290 (56)       | 201 (54)       | 110 (64)      | 282 (55)     | 1465 (59)   | 955 (56)     | 988 (56)      | 1825 (52)   | 554 (56)          | 0 (0)        |
| <b>Height, cm mean (SD)</b>            | 167 (10)    | 167 (9)        | 167 (9)        | 170 (8)       | 168 (9)      | 166 (9)     | 168.0 (9)    | 171 (9)       | 169 (4)     | 170 (9)           | 175 (6)      |
| <b>Weight, kg mean (SD)</b>            | 79 (15)     | 77 (13)        | 77 (13)        | 70 (13)       | 75 (14)      | 76 (13)     | 78.5 (14)    | 81 (16)       | 79 (17)     | 79 (15)           | 80 (12)      |
| <b>BMI, kg/m<sup>2</sup> mean (SD)</b> | 28.5 (7.7)  | 27.0 (4.0)     | 26.9 (4)       | 24.2 (3.7)    | 26.9 (4.4)   | 27.4 (4.1)  | 27.8 (4.0)   | 27.7 (4.7)    | 27.8 (4.8)  | 27.3 (4.6)        | 26.3 (3.4)   |
| <b>Obesity, No (%)</b>                 | 162 (29)    | 114 (22)       | 82 (22)        | 10 (5)        | 177 (21)     | 537 (23)    | 404 (25)     | 419 (24)      | 895 (26)    | 255 (26)          | 155 (13)     |
| <b>Systolic BP, mmHg mean (SD)</b>     | 145 (24)    | 133 (19)       | 135 (20)       | N/A           | 149 (19)     | 153 (21)    | 145 (20)     | 133 (19)      | 137 (21)    | 124 (17)          | 147 (19)     |
| <b>Hypertension, No. (%)</b>           | 422 (79)    | 106 (18)       | 75 (20)        | N/A           | 746 (83)     | 2133 (87)   | 1208 (74)    | 824 (47)      | 901 (26)    | 391 (40)          | 909 (75)     |
| <b>Smoking, No. (%)</b>                | 251 (45)    | 112 (19)       | 67 (18)        | N/A           | 51 (6)       | 298 (12)    | 275 (16)     | 467 (27)      | 955 (27)    | 216 (22)          | 245 (21)     |
| <b>Diabetes, No. (%)</b>               | 108 (19)    | N/A            | N/A            | N/A           | 126 (15)     | 329 (14)    | 180 (11)     | 119 (7)       | 278 (8)     | 31 (3)            | 131 (11)     |

**Supplemental Material: New Genetic variants for Cardiac Structure and Function – EchoGen**

**Table S 2, continued**

| <b>Cohort / study</b>                  | <b>CARLA</b> | <b>Cilento</b> | <b>MPP</b> | <b>YFS</b> | <b>Generation R</b> | <b>JHS</b> | <b>NOMAS</b> |
|----------------------------------------|--------------|----------------|------------|------------|---------------------|------------|--------------|
| <b>Age, y mean (SD)</b>                | 67 (10)      | 53 (19)        | 68 (6)     | 42 (5)     | 6 (0)               | 55 (13)    | 70 (9)       |
| <b>Age range, y</b>                    | 50 - 87      | 12-98          | 56-79      | 34-49      | 5-9                 | 21-93      | 41-97        |
| <b>Female sex, No. (%)</b>             | 636 (45)     | 745 (56)       | 525 (29)   | 937 (55)   | 1025 (49)           | 1109 (62)  | 653 (59)     |
| <b>Height, cm mean (SD)</b>            | 167 (9)      | 162.0 (10)     | 171.6 (9)  | 172 (9)    | 120 (6)             | 169 (9)    | 162 (10)     |
| <b>Weight, kg mean (SD)</b>            | 79 (15)      | 70 (14)        | 83.5 (15)  | 79 (17)    | 23 (3)              | 92 (22)    | 75 (14)      |
| <b>BMI, kg/m<sup>2</sup> mean (SD)</b> | 28.3 (4.5)   | 26.5 (4.8)     | 28.3 (4.3) | 26.5 (5.0) | 15.9 (1.4)          | 32.0 (7.5) | 28.7 (5.1)   |
| <b>Obesity, No (%)</b>                 | 998 (71)     | 271 (20)       | 172 (10)   | 347 (20)   | 32 (1)              | 931 (52)   | 383 (35)     |
| <b>Systolic BP, mmHg mean (SD)</b>     | 138 (20)     | 124.2 (14)     | 148 (20)   | 119 (14)   | 102.1 (7.9)         | 127 (18)   | 138 (19)     |
| <b>Hypertension, No. (%)</b>           | 1140 (81)    | 569 (42)       | 1419 (80)  | 141 (8)    | 3 (0)               | 56 (1003)  | 726 (66)     |
| <b>Smoking, No. (%)</b>                | 197 (14)     | 281 (21)       | 325 (18.1) | 347 (20)   | N/A                 | 235 (13)   | 174 (16)     |
| <b>Diabetes, No. (%)</b>               | 275 (20)     | 124 (9)        | 633 (35.3) | 40 (2)     | 0 (0)               | 286 (17)   | 219 (19.9)   |

## 2.4 Echo methods (Table S3)

Table S 3: Echo methods used by cohorts

| Cohort / study   | Echo device                                                  | LVEF method (as exclusion criteria for diastolic traits) 1= LVEF (Simpson) 2= LVEF (Teichholz) 3=Fractional shortening 4= visual estimation | Definition of binary diastolic traits used<br>1= tissue imaging 2= pulmonary venous inflow and mitral inflow at peak Valsalva maneuver | Reference |
|------------------|--------------------------------------------------------------|---------------------------------------------------------------------------------------------------------------------------------------------|----------------------------------------------------------------------------------------------------------------------------------------|-----------|
| AGES             | Siemens Medical Systems, Sequoia C256, Acuson                | 4                                                                                                                                           | 1                                                                                                                                      | 52        |
| ASCOT            | ATL, HDI 5000                                                | 1 or 2                                                                                                                                      | 1                                                                                                                                      | 53        |
| ASPS             | GE Medical, Vingmed CFM 750 and CFM 800                      | 2 or 4                                                                                                                                      | N/A                                                                                                                                    | 1         |
| CARDIA           | ACUSON 128                                                   | N/A                                                                                                                                         | N/A                                                                                                                                    | 54,55     |
| CARLA            | GE Medical, Vivid 5                                          | 1, 2 or 3                                                                                                                                   | 1                                                                                                                                      | 56,57     |
| CHS              | Toshiba, SSH-160A                                            | 4                                                                                                                                           | N/A                                                                                                                                    | 55,58     |
| Cilento          | GE HealthCare, Vivid 3                                       | 1                                                                                                                                           | N/A                                                                                                                                    | N/A       |
| FHS1, FHS2, FHS3 | Hewlett Packard, 77020AC / Sonos 1000                        | 3 or 4                                                                                                                                      | 1                                                                                                                                      | 59        |
| GenerationR      | ATL-Philips, Model HDI 5000 or GE Medical Systems, Logiq E9  | N/A                                                                                                                                         | N/A                                                                                                                                    | 60        |
| GHS-I, -II, -III | Philips, IE33                                                | 1                                                                                                                                           | 1                                                                                                                                      | 61        |
| HyperGEN         | Acuson 128                                                   | 2                                                                                                                                           | N/A                                                                                                                                    | 62-64     |
| JHS              | Hewlett Packard 4500                                         | 4                                                                                                                                           | 2                                                                                                                                      | 65        |
| KNHI             | Hewlett-Packard Sonos 5500                                   | 1                                                                                                                                           | 2                                                                                                                                      | 66        |
| KORA-F3, -F4     | Hewlett Packard, Sonos 1500                                  | 4                                                                                                                                           | 1                                                                                                                                      | 1,67      |
| MICROS           | Toshiba, Aplio XG                                            | 1                                                                                                                                           | 2                                                                                                                                      | N/A       |
| MPP              | Acuson, Sequoia or Philips, Sonos 5500                       | 4                                                                                                                                           | 1                                                                                                                                      | 45        |
| NOMAS            | Philips, IE33                                                | 1 or 4                                                                                                                                      | 1                                                                                                                                      | 68        |
| PIVUS            | Accuso, XP128                                                | 2                                                                                                                                           | N/A                                                                                                                                    | 69        |
| RS-I             | Esaote Biomedica AU3, Acuson, Cypress; GE, Vivid I (for TDI) | 3 or 4                                                                                                                                      | N/A                                                                                                                                    | 70        |
| RS-II, -III      | Acuson, Cypress; GE, Vivid I (for TDI)                       | 3 or 4                                                                                                                                      | N/A                                                                                                                                    | 70        |
| SHIP             | GE Medical, Vingmed CFM 800A                                 | 2                                                                                                                                           | 2                                                                                                                                      | 49,71     |
| SHIP-Trend       | GE Medical, Vivid i                                          | 2                                                                                                                                           | 1                                                                                                                                      | 49        |
| ULSAM            | Hewlett Packard, Sonos 1500                                  | 2                                                                                                                                           | N/A                                                                                                                                    | 72        |
| YFS              | ACUSON, Sequoia 512                                          | 1 or 2                                                                                                                                      | 1                                                                                                                                      | N/A       |

## 2.5 Echo values by cohorts (Table S4)

**Table S 4: Echo values by cohorts**

| Cohort / study | AoD <sup>73</sup> | LA <sup>73</sup> | LVDD <sup>73</sup> | LVWT <sup>73</sup> | LVM [g]  | FS [%]      | LVSD [n (%)] |
|----------------|-------------------|------------------|--------------------|--------------------|----------|-------------|--------------|
| AGES           | 3.2 (0.5)         | 3.9 (0.6)        | 4.4 (0.7)          | 2.2 (0.5)          | 168 (54) | 32.9 (10.5) | 108 (30)     |
| ASCOT          | N/A               | 4.1 (0.6)        | 4.9 (0.5)          | 2.5 (0.4)          | 238 (67) | N/A         | N/A          |
| ASPS           | 3.0 (0.5)         | 3.8 (0.6)        | 4.7 (0.6)          | 2.2 (0.4)          | 195 (63) | N/A         | 104 (13)     |
| CARDIA         | 2.8 (0.4)         | 3.5 (0.5)        | 5.0 (0.5)          | 1.7 (0.3)          | 146 (43) | 35.8 (5.7)  | 173 (12)     |
| CARLA          | 3.1 (0.4)         | 4.0 (0.6)        | 4.9 (0.7)          | 2.2 (0.4)          | 208 (68) | 37.6 (7.7)  | 82 (7)       |
| CHS            | 3.2 (0.4)         | 3.9 (0.7)        | 4.9 (0.6)          | 1.8 (0.3)          | 147 (44) | 41.8 (7.3)  | 234 (7)      |
| Cilento        | 3.4 (0.4)         | 3.7 (0.4)        | 4.9 (0.4)          | 2.0 (0.2)          | 176 (38) | 35.0 (2.7)  | N/A          |
| FHS1           | N/A               | N/A              | N/A                | N/A                | N/A      | N/A         | N/A          |
| FHS2           | 3.1 (0.3)         | 3.8 (0.4)        | 4.8 (0.4)          | 1.9 (0.2)          | 159 (37) | 36.5 (4.0)  | 126 (5)      |
| FHS3           | 3.1 (0.4)         | 2.7 (0.5)        | 4.9 (0.4)          | 1.8 (0.2)          | 158 (42) | 35.63 (3.3) | 60 (2)       |
| Generation R   | 1.9 (0.2)         | N/A              | 3.8 (0.3)          | N/A                | N/A      | N/A         | N/A          |
| GHS-I          | N/A               | N/A              | 4.5 (0.5)          | 2.0 (0.3)          | 159 (47) | 37.5 (6.3)  | 71 (2)       |
| GHS-II         | N/A               | N/A              | 4.6 (0.5)          | 2.0 (0.3)          | 157 (49) | 36.4 (5.4)  | 17 (1)       |
| GHS-III        | N/A               | N/A              | 4.9 (0.6)          | 1.9 (0.3)          | 163 (51) | 34.9 (4.2)  | 116 (1)      |
| HyperGEN       | 3.4 (0.4)         | 3.5 (0.6)        | 5.15 (0.5)         | 0.8 (0.2)          | 157 (47) | 33.7 (5.3)  | 151 (12.3)   |
| JHS            | 3.1 (0.3)         | 3.6 (0.4)        | 4.9 (0.4)          | 1.7 (0.3)          | 146 (37) | 38.8 (6.2)  | 193 (7)      |
| KNHI           | 3.2 (0.5)         | 4.0 (0.6)        | 4.9 (0.5)          | 2.2 (0.6)          | 219 (61) | N/A         | N/A          |
| KORA-F3        | 2.9 (0.4)         | 3.8 (0.5)        | 4.8 (0.4)          | 1.9 (0.3)          | 163 (38) | N/A         | 48 (8)       |
| KORA-F4        | 3.1 (0.4)         | 3.7 (0.5)        | 4.7 (0.6)          | 1.9 (0.5)          | 158 (63) | 38.0 (8.0)  | 44 (13)      |
| MICROS         | 3.2 (0.5)         | 3.7 (0.6)        | 4.9 (0.6)          | N/A                | N/A      | 43.9 (8.8)  | N/A          |
| MPP            | N/A               | 4.1 (0.6)        | 4.8 (0.6)          | 2.1 (0.3)          | 179 (54) | N/A         | 41 (2)       |
| NOMAS          | 3.1 (0.4)         | 3.8 (0.5)        | 4.4 (0.5)          | 2.3 (0.3)          | 183 (52) | 36.8 (6.9)  | N/A          |
| PIVUS          | N/A               | 3.9 (0.7)        | N/A                | 2.7 (0.4)          | 178 (59) | 45.9 (7.9)  | 30 (4)       |
| RS-I           | 3.3 (0.4)         | 4.0 (0.6)        | 5.0 (0.6)          | 1.6 (0.3)          | 144 (43) | 37.4 (7.3)  | 266 (12)     |
| RS-II          | 3.4 (0.4)         | 4.0 (0.6)        | 5.2 (0.5)          | 1.6 (0.2)          | 142 (40) | 40.8 (5.7)  | 65 (4)       |
| RS-III         | 3.3 (0.4)         | 4.0 (0.5)        | 5.2 (0.4)          | 1.5 (0.2)          | 132 (37) | 42.8 (3.9)  | 5 (0)        |
| SHIP           | 3.0 (0.4)         | 3.6 (0.6)        | 5.0 (0.5)          | 2.0 (0.4)          | 188 (15) | 37.0 (7.3)  | 402 (13)     |
| SHIP-Trend     | 2.8 (0.4)         | 3.9 (0.6)        | 4.9 (0.6)          | 2.0 (0.3)          | 169 (14) | 42.3 (8.4)  | 47 (5)       |
| ULSAM          | N/A               | 4.3 (0.6)        | N/A                | N/A                | 240 (64) | 35.9 (7.1)  | 53 (14)      |
| YFS            | 3.2 (0.3)         | 3.5 (0.4)        | 5.2 (0.5)          | 1.4 (0.2)          | 129 (32) | 32.1 (2.9)  | N/A          |

Table S 4, continued

| Cohort / study   | Mv-E [cm/s] | Mv-A [cm/s] | E/A       | DecTime [s]  | IVRT [s]    | E' [cm/s]  | E/E'       | DDpEF [n (%)] | HFpEF [n (%)] |
|------------------|-------------|-------------|-----------|--------------|-------------|------------|------------|---------------|---------------|
| AGES             | 70.9 (17.2) | 80.6 (19.6) | 0.9 (0.3) | 0.27 (0.06)  | N/A         | 9.9 (2.2)  | 7.5 (2.3)  | 101 (35)      | 77 (21)       |
| ASCOT            | 60.1 (12.7) | 70.7 (13.9) | 0.9 (0.2) | 0.19 (0.04)  | N/A         | 8.0 (1.8)  | 7.8 (1.9)  | N/A           | N/A           |
| ASPS             | N/A         | N/A         | N/A       | N/A          | N/A         | N/A        | N/A        | N/A           | N/A           |
| CARDIA           | N/A         | N/A         | N/A       | N/A          | N/A         | N/A        | N/A        | N/A           | N/A           |
| CARLA            | 67.2 (17.6) | 70.4 (20.5) | 1.0 (0.4) | 0.30 (0.11)  | 0.1 (0)     | 6.2 (1.8)  | 11.6 (4.4) | 411 (29)      | 26 (2)        |
| CHS              | 72.0 (15.9) | 83.3 (21.4) | 0.9 (0.3) | 0.25 (0.06)  | 0.73 (0.29) | N/A        | N/A        | N/A           | N/A           |
| Cilento          | 70.2 (16.8) | 71.2 (18.4) | 1.1 (0.4) | 0.18 (0.04)  | 0.10 (0.01) | N/A        | N/A        | N/A           | N/A           |
| FHS1             | 42.0 (15.8) | 60.6 (15.4) | 0.7 (0.2) | 0.15 (0.05)  | N/A         | N/A        | N/A        | N/A           | N/A           |
| FHS2             | N/A         | N/A         | N/A       | N/A          | N/A         | N/A        | N/A        | N/A           | N/A           |
| FHS3             | N/A         | N/A         | N/A       | N/A          | N/A         | N/A        | N/A        | N/A           | N/A           |
| Generati<br>on R | N/A         | N/A         | N/A       | N/A          | N/A         | N/A        | N/A        | N/A           | N/A           |
| GHS-I            | 78.4 (18.0) | 75.5 (19.0) | 1.1 (0.4) | 0.23 (0.05)  | 0.08 (0.03) | 11.2 (3.5) | 7.6 (2.7)  | 519 (20)      | 150 (7)       |
| GHS-II           | 76.7 (16.8) | 74.2 (17.7) | 1.1 (0.4) | 0.22 (0.04)  | 0.09 (0.02) | 11.2 (3.3) | 7.3 (2.4)  | 180 (19)      | 44 (5)        |
| GHS-III          | 78.6 (16.6) | 72.7 (19.2) | 1.1 (0.4) | 0.21 (0.04)  | 0.45 (0.05) | 10.8 (3.1) | 8.4 (23.3) | 1548 (19)     | 406 (6)       |
| HyperGE<br>N     | 62 (16.6)   | 58.5 (18.0) | 1.3 (0.4) | 0.186 (0.06) | 0.80 (0.02) | N/A        | N/A        | N/A           | N/A           |
| JHS              | 81.0 (20.0) | 84.0 (19.0) | 1.2 (0.3) | N/A          | 0.87 (0.14) | N/A        | N/A        | N/A           | N/A           |
| KNHI             | 76.5 (20.1) | 76.4 (21.2) | 1.1 (0.4) | 0.24 (0.06)  | 0.10 (0.02) | 8.8 (3.2)  | 10.0 (5.1) | 162 (41)      | 66 (14)       |
| KORA-F3          | 72.8 (17.4) | 74.1 (15.4) | 1.0 (0.3) | 0.23 (0.06)  | 0.11 (0.02) | 7.2 (2.0)  | 10.6 (3.3) | N/A           | N/A           |
| KORA-F4          | 62.0 (14.9) | 66.0 (16.4) | 1.0 (0.5) | 0.23 (0.07)  | 0.08 (0.03) | N/A        | N/A        | N/A           | N/A           |
| MICROS           | N/A         | N/A         | N/A       | N/A          | N/A         | N/A        | N/A        | N/A           | N/A           |
| MPP              | 72.2 (17.5) | 79.8 (18.2) | 0.9 (0.3) | 0.22 (0.05)  | N/A         | 7.8 (2.7)  | 10.3 (4.3) | 602 (46)      | 62 (5)        |
| NOMAS            | 71.3 (17.7) | 89.3 (20.8) | 0.8 (0.3) | 0.22 (0.05)  | N/A         | 7.3 (1.7)  | 10.1 (3.4) | 367 (62)      | 36 (14)       |
| PIVUS            | 60.0 (14.0) | 67.6 (17.0) | 0.9 (0.3) | N/A          | 1.11 (0.19) | 6.1 (1.3)  | 10.0 (2.7) | N/A           | N/A           |
| RS-I             | 64.6 (17.3) | 78.1 (18.4) | 0.8 (0.3) | 0.22 (0.05)  | N/A         | 7.1 (8.9)  | 12.2 (5.0) | N/A           | N/A           |
| RS-II            | 66.5 (14.9) | 75.3 (15.9) | 0.9 (0.2) | 0.21 (0.04)  | N/A         | 7.1 (1.8)  | 10.4 (3.5) | N/A           | N/A           |
| RS-III           | 70.3 (15.2) | 66.0 (13.9) | 1.1 (0.3) | 0.19 (0.03)  | N/A         | N/A        | N/A        | N/A           | N/A           |
| SHIP             | 68.8 (15.7) | 62.2 (15.7) | 1.2 (0.4) | 0.17 (0.42)  | 0.09 (0.02) | N/A        | N/A        | 334 (16)      | 37 (2)        |
| SHIP-<br>Trend   | 61.0 (15.0) | 63.0 (14.4) | 1.2 (0.4) | 0.17 (0.03)  | 0.88 (0.02) | 13.3 (3.9) | 5.7 (1.7)  | 63 (9)        | 5 (0)         |
| ULSAM            | N/A         | N/A         | N/A       | N/A          | N/A         | N/A        | N/A        | N/A           | N/A           |
| YFS              | 76.9 (13.0) | 51.4 (11.3) | 1.5 (0.4) | 0.22 (0.04)  | 0.11 (0.02) | 16.2 (2.7) | 4.8 (1.0)  | N/A           | N/A           |

Echo values for subjects with echo and genotyping data. Numbers are mean (SD) or numbers (percentage). LV= left ventricular; LVDD= LV diastolic dimensions; LVWT= LV wall thickness; LA= left atrial; FS= fractional shortening; LVSD= LV systolic dysfunction; E= Peak velocity of the mitral E-wave; A= Peak velocity of the mitral A-wave; E/A= Ratio of the mitral E- and A-wave; E/A\_val= Ratio of the mitral E- and A-wave during Valsalva maneuver; Dec time= Deceleration time of the mitral E-wave; IVRT= Isovolumetric relaxation time; E'= Peak velocity of the excursion of the lateral mitral annulus in the early diastolic phase; E/E'= Ration of E and 'E; S= systolic pulmonary venous forward flow; D= diastolic pulmonary venous forward flow; S/D= ratio of systolic and diastolic pulmonary venous flow (S/D); DDpEF= Diastolic Dysfunction with preserved ejection fraction; HFpEF= Heart failure with preserved ejection fraction.

## 2.6 Genotyping Methods and Imputation (Table S5)

**Table S 5: Genotyping information by cohorts**

| Cohort / study | Array type                       | Genotype calling    | QC filters for genotyped SNPs used for imputation                                                                                                                                                                     | No of SNPs used for imputation | Imputation software | Imputation Backbone for phased CEU haplotypes (NCBI build) | Filtering of imputed genotypes                                   | Data management and statistical analysis | Population stratification or Principal Components |
|----------------|----------------------------------|---------------------|-----------------------------------------------------------------------------------------------------------------------------------------------------------------------------------------------------------------------|--------------------------------|---------------------|------------------------------------------------------------|------------------------------------------------------------------|------------------------------------------|---------------------------------------------------|
| <b>AGES</b>    | Illumina 370CNV                  | Illumina BeadStudio | call rate < 97%<br>pHWE < $1 \times 10^{-6}$ , mishap (PLINK haplotype-based test for non-random missing genotype data[2])<br>$p < 1 \times 10^{-9}$ , and mismatched positions between Illumina, dbSNP and/or HapMap | 325,094                        | MACH version 1.0.16 | HapMap, release 22 (build 36)                              | None                                                             | ProABEL                                  | None                                              |
| <b>ASCOT</b>   | Illumina HumanCNV370-Duo         | Illumina BeadStudio | CR<0.97, MAF<0.05, HWE_pvalue<1e-07                                                                                                                                                                                   | 283,291                        | BEAGLE              | HapMap II release 24 CEU reference panel                   | Information score<0.6, MAF<5%                                    | PLINK, R                                 | Adjusted for first 10PCs                          |
| <b>ASPS</b>    | Illumina Human 610-Quad BeadChip | Illuminus           | call rate <97.5%, MAF <1%, , pHWE <1E-6                                                                                                                                                                               | 550,635                        | MACH v1.0.15        | HapMap, release 22 (build 36)                              | None                                                             | SPSS, ProbABEL, R                        | None                                              |
| <b>CARDIA</b>  | Affymetrix 6.0                   | BEAGLE, Birdseed    | call rate <95%, MAF<3%, pHWE <10E-4                                                                                                                                                                                   | 579,630                        | BEAGLE              | HapMap, release 22 (build 36)                              | Rsqr<0.3, MAF<1%                                                 | ProbABEL, PLINK, R                       | None                                              |
| <b>CARLA</b>   | ABI                              | N/A                 | N/A                                                                                                                                                                                                                   | N/A                            | N/A                 | NCBI built 37                                              | N/A                                                              | R version 2.14.1                         | None                                              |
| <b>CHS</b>     | Illumina 370CNV BeadChip system  | Illumina BeadStudio | call rate < 97%, HWE $P < 10^{-5}$ , > 2 duplicate errors or Mendelian inconsistencies (for reference CEPH trios), heterozygote frequency = 0, SNP not found in HapMap.                                               | 306,655                        | BIMBAM v0.99        | HapMap, release 22 (build 36)                              | SNPs were excluded for variance on the allele dosage $\leq 0.01$ | R, robust SE estimates                   | None                                              |

**Supplemental Material: New Genetic variants for Cardiac Structure and Function – EchoGen**

**Table S 5, continued**

| Cohort / study          | Array type                                        | Genotype calling          | QC filters for genotyped SNPs used for imputation                                                                                                                                                                                                                                                        | No of SNPs used for imputation      | Imputation software | Imputation Backbone for phased CEU haplotypes (NCBI build) | Filtering of imputed genotypes                 | Data management and statistical analysis                                                        | Population stratification or Principal Components                                                   |
|-------------------------|---------------------------------------------------|---------------------------|----------------------------------------------------------------------------------------------------------------------------------------------------------------------------------------------------------------------------------------------------------------------------------------------------------|-------------------------------------|---------------------|------------------------------------------------------------|------------------------------------------------|-------------------------------------------------------------------------------------------------|-----------------------------------------------------------------------------------------------------|
| <b>Cilento</b>          | Illumina 370K (n=859) Illumina OmniExpress(n=758) | Illumina BeadStudio       | Imputation was performed using the following filters: SNPs in common between the two arrays, call rate<95%, MAF<1%. For the directly typed SNPs in common between the two groups, the real genotype was used in the association analysis, while the imputation dosage was considered for the other SNPs. | 190862                              | MACH, minimac       | 1000G Phase I integrated Release Version 3 (build 37)      | None                                           | R, linear model, GenABEL and ProbABEL (mmscore function was used to account for relatedness)    | none                                                                                                |
| <b>FHS1, FHS2, FHS3</b> | Affymetrix 500K; Affymetrix 50K supplemental      | BRLMM                     | pHWE<1e-6, call rate<97%, mishap p<1e-9, MAF<0.01, Mendelian errors>100, SNPs not in Hapmap or strandedness issues merging with Hapmap                                                                                                                                                                   | 378,163                             | MACH version 1.0.15 | HapMap, release 22 (build 36)                              | None                                           | R, linear mixed effect models and GEE models, robust variance option to account for relatedness | Adjusted for first PC estimated from Eigenstrat associated with calcium levels ( $P < 0.05$ ). (35) |
| <b>Generation R</b>     | Illumina 610 Quad and 660W                        | Genomestudio 2009 V.1.1.9 | call rate <98%, MAF <1%, pHWE <10E-6                                                                                                                                                                                                                                                                     | 492,871                             | MACH and mini-mac   | HapMap release 22                                          | None                                           | MACH2QTL                                                                                        | Adjusted for the first 4 PC's                                                                       |
| <b>GHS-I, -II, -III</b> | Affymetrix SNP 6.0                                | Birdseed2                 | call rate ≤98%, MAF ≤0.01 and pHWE≤0.0001                                                                                                                                                                                                                                                                | 662,405 (GHS-I)<br>673,914 (GHS-II) | IMPUTE v2.1.0       | HapMap, release 24 (build 36)                              | None                                           | MetABEL, R                                                                                      | None                                                                                                |
| <b>HyperGEN</b>         | Affymetrix 5.0                                    | Birdsuite                 | monomorphic SNPs, X-chromosome SNPs, non-Mendelian inheritance errors, missing rate >5%, MAF<1%, Hardy-Weinberg p-value <10 <sup>-6</sup>                                                                                                                                                                | 358327                              | MACH                | HapMap, release 22 (build 36)                              | Rsq<0.3, MAF<1%, MAF<1%, HWP <10 <sup>-6</sup> | R, LMEKIN package                                                                               | Adjusted for 10 PCs                                                                                 |
| <b>JHS</b>              | Affymetrix SNP 6.0                                | Birdseed2                 | pHWE<1e-6, call rate<95%, MAF<0.01, Imputation quality >0.30                                                                                                                                                                                                                                             | 868,969 (JHS)<br>796,384 (ARIC-JHS) | MACH version 1.0.16 | HapMap, release 22 (build 36)                              | None                                           | ProbABEL                                                                                        | Adjusted for the first 10 PCs                                                                       |

**Supplemental Material: New Genetic variants for Cardiac Structure and Function – EchoGen**

**Table S 5, continued**

| Cohort / study | Array type                                                                   | Genotype calling                                             | QC filters for genotyped SNPs used for imputation                                                                                                                                                                                              | No of SNPs used for imputation                               | Imputation software            | Imputation Backbone for phased CEU haplotypes (NCBI build) | Filtering of imputed genotypes                                  | Data management and statistical analysis       | Population stratification or Principal Components                                                |
|----------------|------------------------------------------------------------------------------|--------------------------------------------------------------|------------------------------------------------------------------------------------------------------------------------------------------------------------------------------------------------------------------------------------------------|--------------------------------------------------------------|--------------------------------|------------------------------------------------------------|-----------------------------------------------------------------|------------------------------------------------|--------------------------------------------------------------------------------------------------|
| <b>KNHI</b>    | Affymetrix 500K (n= 127),<br>Affymetrix 5.0 (n= 17) Affymetrix 6.0 (n = 417) | Affy 500K: BRLMM<br>Affy 5.0: BRLMM-P<br>Affy 6.0: Birdseed2 | per chip type: SNP call rate <95%,<br>MAF <0.01, pHWE <10-5; in sample: SNP call rate <90%;<br>exclusion of SNPs with discordance rates >5% between chip types, exclusion of discordant genotypes for subjects typed on >1chip                 | SNPs with call rate >90% in sample: 384,234 (out of 736,307) | MACH                           | "HapMap, release 22 (build 36)<br>dbSNP 126                | None (QC filters on meta-level: RSQ < 0.6)                      | PLINK, R, linear models with ProbABEL, GenABEL | None (subjects excluded if related, wrong ethnicity, sex-mismatch, or individual call rate <90%) |
| <b>KORA-F3</b> | Affymetrix 500K                                                              | BRLMM                                                        | pHWE<1e-6, individual call rate<93%, snp call rate<95%,<br>MAF<0.01                                                                                                                                                                            | 379,392                                                      | Impute v1.0.0                  | HapMap, release 22 (build 36)                              | None                                                            | R, linear models                               | None                                                                                             |
| <b>KORA-F4</b> | Affymetrix 6.0                                                               | Birdseed2                                                    | On chip level only subjects with overall genotyping efficiencies of at least 93% were included resulting in an average genotyping efficiency of 93% per chip. In addition the called sex had to agree with the sex in the KORA study database. | 630,550                                                      | MACH v1.0.16                   | HapMap, release 22 (build 36)                              | None                                                            | R, MACH2QTL, ProbABEL                          | None                                                                                             |
| <b>LURIC</b>   | Affymetrix 6.0                                                               | Birdseed2                                                    | pHWE<1e-4, individual call rate<95%, snp call rate<98%,<br>MAF<0.01                                                                                                                                                                            | 686,195                                                      | MACH v1                        | HapMap, release 22 (build 36)                              | None                                                            | PLINK, R, SPSS                                 | None                                                                                             |
| <b>MAGNet</b>  | Affymetrix 6.0                                                               | Birdseed2                                                    | genotype call rate > 95%<br>minor allele frequency (MAF) > 15%<br>Hardy-Weinberg equilibrium (p > 10-6)                                                                                                                                        | 360,046                                                      | Minimac (v2012.1 1.16) program | N/A                                                        | imputation quality threshold of 0.5 and a MAF threshold of 0.15 | PLINK,R                                        | None                                                                                             |
| <b>MICROS</b>  | HumanHap 300v2                                                               | Illumina BeadStudio                                          | call rate <98%,<br>MAF <1%, pHWE <10E-6                                                                                                                                                                                                        | 290,356                                                      | MACH v1                        | HapMap, release 22 (build 36)                              | None                                                            | ProbABEL,mm score argument                     | None                                                                                             |
| <b>MPP</b>     | Sequenom MassArray iPlex                                                     | MassArray Typer 4.0                                          | N/A                                                                                                                                                                                                                                            | N/A                                                          | N/A                            | N/A                                                        | N/A                                                             | SAS 9.2                                        | None                                                                                             |

**Supplemental Material: New Genetic variants for Cardiac Structure and Function – EchoGen**

**Table S 5, continued**

| <b>Cohort / study</b> | <b>Array type</b>                                       | <b>Genotype calling</b>             | <b>QC filters for genotyped SNPs used for imputation</b>                                                        | <b>No of SNPs used for imputation</b>                    | <b>Imputation software</b> | <b>Imputation Backbone for phased CEU haplotypes (NCBI build)</b> | <b>Filtering of imputed genotypes</b>  | <b>Data management and statistical analysis</b>                                 | <b>Population stratification or Principal Components</b>                                                                     |
|-----------------------|---------------------------------------------------------|-------------------------------------|-----------------------------------------------------------------------------------------------------------------|----------------------------------------------------------|----------------------------|-------------------------------------------------------------------|----------------------------------------|---------------------------------------------------------------------------------|------------------------------------------------------------------------------------------------------------------------------|
| <b>NOMAS</b>          | Affymetrix SNP 6.0                                      | Affymetric Power Tools              | call rate<95%, pHWE<1e-6                                                                                        | 804,944 (Black)<br>815,972 (Hispanic)<br>795,588 (White) | IMPUTE 2                   | 1000 Genomes phase 1, version 3 reference panel                   | None                                   | SAS, PLINK                                                                      | Adjusted for PCs estimated using Eigenstrat (first 2 PCs for Hispanics, first PC for Blacks and Whites)                      |
| <b>PIVUS</b>          | Human Omni Express and Metabochip                       | Illumina BeadStudio                 | For SNPs with MAF >=0.05: pHWE<1e-6, call rate<95%; For SNPs with MAF <0.05: pHWE<1e-6, call rate<99%; MAF<0.01 | 738,879                                                  | IMPUTE version 2.1.2       | HapMap, release 22 (build 36)                                     | None                                   | SNPTEST                                                                         | Adjusted for the first 2 PCs estimated from MDS using PLINK                                                                  |
| <b>RS-I,-II, -III</b> | 550K (RS-I and RS-II) and 610K (RS-III) Illumina arrays | Illumina BeadStudio Genecall        | pHWE<1e-6, SNP call rate<97.5%, MAF<0.01                                                                        | RS-I: 512,349;<br>RS-II: 466,389; RS-III: 514,073        | MACH                       | HapMap, release 22 (build 36)                                     | None                                   | R, ProbABEL                                                                     | None                                                                                                                         |
| <b>SHIP</b>           | Affymetrix SNP 6.0                                      | Birdseed2                           | None                                                                                                            | 869,224                                                  | IMPUTE v0.5.0              | HapMap, release 22 (build 36)                                     | duplicate RSID but different positions | QUICKTEST version 0.95 (Params: --method-score), InforSense, InterSystems Caché | We observed no population stratification using principle components estimated using Eigenstrat. [Rice et al. PMID: 16862161] |
| <b>SHIP-Trend</b>     | Illumina Human Omni 2.5                                 | GenomeStudio Genotyping Module v1.0 | excluded: pHWE <= 0.0001 or CallRate <= 0.9 or monomorphic SNPs                                                 | 1,782,967                                                | IMPUTE v2.1.2.3            | HapMap, release 22 (build 36)                                     | duplicate RSID but different positions | QUICKTEST version 0.95 (Params: --method-score), InforSense, InterSystems Caché | We observed no population stratification using principle components estimated using Eigenstrat. [Rice et al. PMID: 16862161] |
| <b>ULSAM</b>          | Human Omni Express and Metabochip                       | Illumina BeadStudio                 | For SNPs with MAF >=0.05: pHWE<1e-6, call rate<95%; For SNPs with MAF <0.05: pHWE<1e-6, call rate<99%; MAF<0.01 | 738,879                                                  | IMPUTE                     | HapMap, release 22 (build 36)                                     | None                                   | SNPTEST                                                                         | Adjusted for the first 2 PCs estimated from MDS using PLINK                                                                  |
| <b>YFS</b>            | Illumina 670k                                           | Illuminus                           | call rate <95%, MAF<1%, pHWE <10E-6                                                                             | 546,677                                                  | SHAPEIT v1, IMPUTE v2.2.2  | 1000 Genomes Phase I (build 37)                                   | None                                   | R, SNPTEST                                                                      | None                                                                                                                         |

### 3 Additional tables and figures (Table S6-S19, Figures S1-S20)

**Table S 6: Individual study lambdas for left ventricular structure and systolic function echocardiographic traits**

| Study             | AoD  | LA   | LVDD | LVWT | LVM  | FS   | LVSD |
|-------------------|------|------|------|------|------|------|------|
| <b>AGES</b>       | 1.01 | 1.03 | 0.99 | 0.98 | 1.00 | 1.02 | 1.00 |
| <b>ASCOT</b>      | NA   | 1.01 | 1.01 | 0.99 | 0.94 | NA   | NA   |
| <b>ASPS</b>       | 1.01 | 1.02 | 0.99 | 1.01 | 0.99 | NA   | 1.01 |
| <b>CARDIA</b>     | 1.02 | 0.99 | 0.99 | 1.00 | 1.01 | 1.00 | 1.02 |
| <b>CHS</b>        | 1.03 | 1.09 | 1.02 | 1.00 | 1.02 | 1.01 | 1.01 |
| <b>FHS-2</b>      | 1.03 | 1.04 | 1.01 | 1.03 | 1.04 | 1.01 | 0.99 |
| <b>FHS-3</b>      | 1.03 | 1.02 | 1.02 | 1.03 | 1.03 | 1.03 | 1.03 |
| <b>GHS-I</b>      | NA   | NA   | 1.01 | 1.02 | 1.01 | 1.01 | 1.01 |
| <b>GHS-II</b>     | NA   | NA   | 1.00 | 1.01 | 1.01 | 1.00 | 0.99 |
| <b>HyperGen</b>   | 1.10 | 1.08 | 1.12 | 1.16 | 1.10 | 1.10 | 1.10 |
| <b>KNHI</b>       | 1.00 | 1.02 | 1.01 | 1.01 | 0.99 | NA   | NA   |
| <b>KORA-F3</b>    | 1.00 | 1.01 | 1.00 | 1.00 | 0.99 | 0.99 | 1.01 |
| <b>KORA-F4</b>    | 1.01 | 1.01 | 1.02 | 1.00 | 1.00 | 1.01 | 0.99 |
| <b>MICROS</b>     | 1.01 | 1.02 | 1.03 | 1.02 | NA   | 1.01 | NA   |
| <b>PIVUS</b>      | 1.01 | 1.00 | 1.02 | 1.01 | 1.02 | 0.98 | 0.97 |
| <b>RS-I</b>       | 1.02 | 1.02 | 1.00 | 1.01 | 1.01 | 1.01 | 1.01 |
| <b>RS-II</b>      | 0.98 | 1.01 | 1.00 | 0.98 | 1.00 | 1.00 | 0.99 |
| <b>RS-III</b>     | 1.03 | 1.03 | 1.03 | 1.02 | 1.04 | 1.01 | NA   |
| <b>SHIP</b>       | 1.02 | 1.02 | 1.01 | 1.02 | 0.99 | 1.02 | 1.01 |
| <b>SHIP-Trend</b> | 1.01 | 1.01 | 1.02 | 1.00 | 1.01 | 1.00 | 0.99 |
| <b>ULSAM</b>      | NA   | 1.02 | NA   | NA   | 1.00 | 1.00 | 1.03 |

**Table S 6, continued: Individual study lambdas for left ventricular structure and systolic function echocardiographic traits**

| <b>Study</b>      | <b>Mv-E</b> | <b>Mv-A</b> | <b>E/A</b> | <b>DecTime</b> | <b>IVRT</b> | <b>E'</b> | <b>E/E'</b> | <b>DDpEF</b> | <b>HFpEF</b> |
|-------------------|-------------|-------------|------------|----------------|-------------|-----------|-------------|--------------|--------------|
| <b>AGES</b>       | 0.99        | 0.99        | 1.00       | 1.02           | NA          | 0.99      | 0.97        | 1.01         | 1.00         |
| <b>ASCOT</b>      | 1.01        | 0.99        | 1.01       | 1.01           | NA          | 1.01      | 1.00        | NA           | NA           |
| <b>CARDIA</b>     | 1.00        | 1.00        | 1.01       | NA             | 1.01        | NA        | NA          | NA           | NA           |
| <b>CHS</b>        | 1.02        | 1.01        | 1.01       | 1.03           | 1.02        | NA        | NA          | NA           | NA           |
| <b>FHS-1</b>      | 1.02        | 1.03        | 1.01       | 1.03           | NA          | NA        | NA          | NA           | NA           |
| <b>GHS-I</b>      | 1.01        | 1.01        | 1.00       | 1.01           | 1.00        | 1.02      | 1.02        | 1.02         | 1.00         |
| <b>GHS-II</b>     | 1.01        | 1.003       | 1.01       | 1.01           | 0.99        | 1.01      | 1.01        | 1.00         | 0.99         |
| <b>HyperGen</b>   | 1.16        | 1.11        | 1.01       | 1.09           | 1.07        | NA        | NA          | NA           | NA           |
| <b>KNHI</b>       | 1.00        | 0.99        | 0.99       | 1.02           | 0.99        | 0.99      | 1.00        | 1.03         | 0.94         |
| <b>KORA-F3</b>    | 1.01        | 1.01        | 1.01       | 1.01           | 1.04        | 1.00      | 1.00        | 1.02         | 1.05         |
| <b>KORA-F4</b>    | 1.00        | 0.99        | 1.01       | NA             | 0.99        | NA        | NA          | NA           | NA           |
| <b>PIVUS</b>      | 1.00        | 1.01        | 1.01       | NA             | 1.02        | 1.01      | 1.02        | NA           | NA           |
| <b>RS-I</b>       | 1.01        | 1.02        | 1.02       | 1.01           | NA          | 1.01      | 1.01        | NA           | NA           |
| <b>RS-II</b>      | 1.01        | 1.01        | 0.98       | 0.98           | NA          | NA        | NA          | NA           | NA           |
| <b>RS-III</b>     | 1.02        | 1.02        | 1.03       | 1.00           | NA          | NA        | NA          | NA           | NA           |
| <b>SHIP</b>       | 1.00        | 1.01        | 1.01       | 1.01           | 1.02        | NA        | NA          | 0.99         | 1.02         |
| <b>SHIP-Trend</b> | 1.00        | 1.00        | 1.01       | 1.01           | 1.00        | 1.00      | NA          | 1.03         | NA           |

**Table S 7: Meta-analysis results of SNPs per phenotype with a  $P$  value  $< 10^{-4}$  and MAF  $< 0.01$  (LVSD: MAF  $< 0.03$ )**

See Supplemental Excel file “Supplemental Table 7.xls”

**Table S 8: Lookup of novel findings for left ventricular structure and systolic function echocardiographic traits in Caucasian children and generalizability to different ethnicities**

| Subpopulation Cohort |            |     | Caucasian Children* Generation R |      |                                 |                                |      | Hispanics Northern Manhattan Study |                          |                   |     | African Americans Northern Manhattan Study & Jackson Heart Study |                         |                   |      |
|----------------------|------------|-----|----------------------------------|------|---------------------------------|--------------------------------|------|------------------------------------|--------------------------|-------------------|-----|------------------------------------------------------------------|-------------------------|-------------------|------|
| Trait                | SNP        | Chr | Effect/<br>non-effect<br>allele  | EAF  | Effect<br>(SE)                  | <i>P</i><br>value              | N    | EAF                                | Effect<br>(SE)           | <i>P</i><br>value | N   | EAF <sup>1</sup>                                                 | Effect<br>(SE)          | <i>P</i><br>value | N    |
| AoD,<br>cm           | rs806322   | 13  | A/G                              | 0.61 | <b><i>-0.017</i></b><br>(0.005) | <b>6.65 x 10<sup>-4</sup>*</b> | 2070 | 0.49                               | 0.009<br>(0.020)         | 0.638             | 515 | 0.48                                                             | <i>-0.01</i> (0.01)     | 0.54              | 1300 |
|                      | rs6702619  | 1   | G/T                              | 0.48 | <i>0.011</i><br>(0.005)         | <b>0.024</b>                   | 2070 | 0.28                               | <i>0.017</i><br>(0.020)  | 0.408             | 515 | 0.14                                                             | <i>0.03</i> (0.02)      | 0.19              | 1300 |
|                      | rs17696696 | 16  | G/T                              | 0.60 | <i>-0.002</i><br>(0.005)        | 0.676                          | 2070 | 0.49                               | <i>-0.008</i><br>(0.019) | 0.682             | 515 | 0.34                                                             | <i>-0.02</i> (0.01)     | 0.07              | 1300 |
|                      | rs7127129  | 11  | G/A                              | 0.42 | <i>-0.006</i><br>(0.005)        | 0.260                          | 2070 | 0.29                               | <i>-0.031</i><br>(0.021) | 0.130             | 515 | 0.18                                                             | <i>-0.01</i> (0.02)     | 0.62              | 1300 |
|                      | rs17608766 | 17  | C/T                              | 0.15 | <i>0.019</i><br>(0.007)         | <b>5.92 x 10<sup>-3</sup></b>  | 2070 | 0.09                               | <i>0.003</i><br>(0.039)  | 0.934             | 515 | 0.03                                                             | <i>0.07</i> (0.04)      | 0.05              | 1300 |
|                      | rs4765663  | 12  | C/G                              | 0.14 | <i>-0.001</i><br>(0.008)        | 0.908                          | 2070 | 0.11                               | <i>0.006</i><br>(0.029)  | 0.845             | 515 | 0.08                                                             | <i>0.02</i> (0.02)      | 0.24              | 1300 |
| LVDD,<br>cm          | rs11207426 | 1   | A/G                              | 0.38 | <i>0.004</i><br>(0.005)         | 0.429                          | 2070 | 0.31                               | <i>0.024</i><br>(0.021)  | 0.241             | 515 | 0.45                                                             | <i>-0.01</i> (0.01)     | 0.53              | 1300 |
|                      | rs12541595 | 8   | T/G                              | 0.31 | <i>-0.002</i><br>(0.008)        | 0.776                          | 2069 | 0.23                               | <i>0.032</i><br>(0.027)  | 0.225             | 785 | 0.07                                                             | <i>0.02</i> (0.02)      | 0.44              | 1576 |
|                      | rs10774625 | 12  | G/A                              | 0.52 | <i>0.007</i><br>(0.008)         | 0.362                          | 2069 | 0.70                               | <i>0.002</i><br>(0.025)  | 0.930             | 785 | 0.93                                                             | <i>-0.001</i><br>(0.03) | 0.96              | 1576 |
| Mv-A                 | rs12440869 | 15  | T/A                              |      | Not available                   |                                |      | 0.34                               | <i>-0.621</i><br>(1.164) | 0.594             | 575 | 0.34                                                             | <i>0.41</i> (0.94)      | 0.66              | 520  |

Betas in italics represent directional consistency with meta-analysis results; Bold results represent nominally significant findings ( $P < 0.05$ ), results marked with \* are significant after Bonferroni correction for 10 SNPS ( $P < 0.005$ )

<sup>1</sup> From Jackson Heart Study

<sup>2</sup> Northern Manhattan Study N = 97 for AoD and 194 for LVDD; Jackson Heart Study N = 1203 for AoD and 1382 for LVDD

AoD= diameter of the aortic root; LVDD= LV diastolic internal dimension; Chr= chromosome; EAF= effect allele frequency; SE= standard error

**Table S9. Generalizability of novel findings for echocardiographic traits – Effect of genome-wide significant SNPs associated with aortic root diameter on pulse wave velocity in the AortaGen consortium**

| Trait                           | SNP        | Effect / non-effect allele | Effect (SE)    | <i>P</i>                |
|---------------------------------|------------|----------------------------|----------------|-------------------------|
| <b>Pulse wave velocity, m/s</b> | rs806322   | A/G                        | 0.005 (0.012)  | 0.689                   |
|                                 | rs6702619  | G/T                        | 0.003 (0.011)  | 0.805                   |
|                                 | rs17696696 | G/T                        | 0.042 (0.011)  | 1.55 x 10 <sup>-4</sup> |
|                                 | rs7127129  | G/A                        | 0.000 (0.011)  | 0.979                   |
|                                 | rs17608766 | C/T                        | -0.038 (0.016) | 0.018                   |
|                                 | rs4765663  | C/G                        | 0.007 (0.015)  | 0.630                   |
|                                 | rs11207426 | A/G                        | 0.028 (0.012)  | 0.021                   |

SE= standard error.

**Table S10. Generalizability of novel findings for echocardiographic traits – Effect of genome-wide significant SNPs on incident heart failure HF and mortality in patients with HF the CHARGE – Heart Failure consortium**

| SNP        | Effect/<br>non-effect allele | HR (95% CI)<br>Incident HF | <i>P</i><br>Incident HF | HR (95% CI)<br>Mortality in HF | <i>P</i><br>Mortality in HF |
|------------|------------------------------|----------------------------|-------------------------|--------------------------------|-----------------------------|
| rs806322   | A/G                          | 0.97 (0.91-1.03)           | 0.306                   | 1.00 (0.93-1.08)               | 0.971                       |
| rs6702619  | G/T                          | 0.99 (0.93-1.04)           | 0.636                   | 1.02 (0.95-1.09)               | 0.635                       |
| rs17696696 | G/T                          | 1.00 (0.94-1.06)           | 0.950                   | 1.06 (0.99-1.14)               | 0.103                       |
| rs7127129  | G/A                          | 0.99 (0.93-1.05)           | 0.705                   | 1.00 (0.93-1.08)               | 0.941                       |
| rs17608766 | C/T                          | 1.11 (1.01-1.21)           | 0.033                   | 0.98 (0.87-1.11)               | 0.799                       |
| rs4765663  | C/G                          | 1.04 (0.97-1.12)           | 0.254                   | 1.01 (0.92-1.10)               | 0.907                       |
| rs11207426 | A/G                          | 1.07 (1.01-1.14)           | 0.027                   | 1.04 (0.97-1.12)               | 0.289                       |
| rs12541595 | T/G                          | 0.96 (0.90-1.03)           | 0.232                   | 1.00 (0.92-1.08)               | 0.999                       |
| rs10774625 | G/A                          | 1.00 (0.95-1.06)           | 0.963                   | 1.01 (0.94-1.09)               | 0.726                       |
| rs12440869 | T/A                          | 1.04 (0.97-1.11)           | 0.263                   | 0.93 (0.86-1.00)               | 0.062                       |

HR= hazard ratio; CI= confidence interval; HF= heart failure.

**Table S11. Generalizability of novel findings for echocardiographic traits – Effect of the novel genome-wide significant SNPs on all-cause, cardiovascular and heart failure mortality in the LURIC cohort of patients with suspected coronary artery disease**

| SNP        | Effect/<br>non-effect<br>allele | HR (95% CI)<br>Mortality | <i>P</i><br>Mortality | HR (95% CI)<br>CV mortality | <i>P</i><br>CV<br>mortality | HR (95% CI)<br>HF mortality | <i>P</i><br>HF<br>mortality |
|------------|---------------------------------|--------------------------|-----------------------|-----------------------------|-----------------------------|-----------------------------|-----------------------------|
| rs806322   | A/G                             | 1.09 (0.99-1.20)         | 0.079                 | 1.05 (0.93-1.19)            | 0.428                       | 0.83 (0.65-1.07)            | 0.145                       |
| rs6702619  | G/T                             | 1.01 (0.92-1.11)         | 0.806                 | 0.99 (0.88-1.11)            | 0.827                       | 0.87 (0.68-1.12)            | 0.279                       |
| rs17696696 | G/T                             | 0.93 (0.85-1.03)         | 0.146                 | 0.96 (0.85-1.08)            | 0.451                       | 0.94 (0.74-1.21)            | 0.642                       |
| rs7127129  | G/A                             | 0.95 (0.86-1.04)         | 0.275                 | 0.97 (0.86-1.09)            | 0.600                       | 0.85 (0.66-1.09)            | 0.205                       |
| rs17608766 | C/T                             | 0.98 (0.86-1.12)         | 0.758                 | 0.97 (0.82-1.15)            | 0.717                       | 0.92 (0.64-1.31)            | 0.638                       |
| rs4765663  | C/G                             | 1.01 (0.89-1.14)         | 0.875                 | 0.95 (0.81-1.11)            | 0.517                       | 1.07 (0.77-1.47)            | 0.701                       |
| rs11207426 | A/G                             | 1.08 (0.98-1.19)         | 0.109                 | 1.05 (0.93-1.19)            | 0.399                       | 1.43 (1.13-1.83)            | 4.0 x 10 <sup>-3</sup>      |
| rs12541595 | T/G                             | 0.99 (0.89-1.09)         | 0.788                 | 0.97 (0.85-1.10)            | 0.615                       | 0.96 (0.74-1.26)            | 0.784                       |
| rs10774625 | G/A                             | 0.95 (0.86-1.04)         | 0.238                 | 0.94 (0.83-1.05)            | 0.273                       | 0.89 (0.70-1.14)            | 0.368                       |
| rs12440869 | T/A                             | 0.97 (0.87-1.08)         | 0.546                 | 0.90 (0.78-1.03)            | 0.131                       | 0.95 (0.71-1.26)            | 0.710                       |

HR= hazard ratio; CI= confidence interval; CV= cardiovascular; HF= heart failure.

**Table S12. Generalizability of novel findings for echocardiographic traits – Effect of the novel genome-wide significant SNPs on myocardial infarction (MI) and coronary artery disease (CAD) in the CARDIOGRAMplusC4D Consortium**

| SNP        | Effect/<br>non-effect<br>allele | HR (95% CI)<br>MI | <i>P</i><br>MI           | HR (95% CI)<br>CAD | <i>P</i><br>CAD          |
|------------|---------------------------------|-------------------|--------------------------|--------------------|--------------------------|
| rs806322   | A/G                             | 1.00 (0.98-1.02)  | 0.696                    | 1.00 (0.98-1.02)   | 0.912                    |
| rs6702619  | G/T                             | 0.99 (0.97-1.01)  | 0.288                    | 1.00 (0.98-1.02)   | 0.960                    |
| rs17696696 | G/T                             | 1.03 (1.00-1.05)  | 0.021                    | 1.04 (1.02-1.06)   | 8.45 x 10 <sup>-6</sup>  |
| rs7127129  | G/A                             | 1.02 (1.00-1.05)  | 0.023                    | 1.02 (1.00-1.03)   | 0.113                    |
| rs17608766 | C/T                             | 1.05 (1.02-1.09)  | 0.002                    | 1.05(1.02-1.09)    | 4.94 x 10 <sup>-4</sup>  |
| rs4765663  | C/G                             | 0.99 (0.96-1.01)  | 0.323                    | 0.99 (0.97-1.02)   | 0.551                    |
| rs11207426 | A/G                             | 0.99 (0.97-1.01)  | 0.218                    | 0.98 (0.96-0.99)   | 0.011                    |
| rs12541595 | T/G                             | 1.00 (0.98-1.03)  | 0.736                    | 1.00 (0.99-1.03)   | 0.636                    |
| rs10774625 | G/A                             | 0.93 (0.91-0.95)  | 5.09 x 10 <sup>-11</sup> | 0.94 (0.92-0.96)   | 2.69 x 10 <sup>-10</sup> |
| rs12440869 | T/A                             | 1.00 (0.98-1.03)  | 0.688                    | 1.00 (0.98-1.02)   | 0.799                    |

HR= hazard ratio; CI= confidence interval; MI= myocardial infarction; CAD = coronary artery disease.

**Table S 13: Top canonical pathways enriched with echo-related genes from Ingenuity Pathway Analysis**

| <b>Ingenuity Canonical Pathways</b> | <b>P value</b>       | <b>FDR</b> | <b>Ratio</b> | <b>Genes</b>                                                                                                                              |
|-------------------------------------|----------------------|------------|--------------|-------------------------------------------------------------------------------------------------------------------------------------------|
| Protein Kinase A Signaling          | $5.8 \times 10^{-6}$ | 0.002      | 19/386       | <i>ADCY8, CAMK2B, CDC27, CREB5, DUSP12, DUSP18, FLNC, GLI3, GNB4, HIST2H3C, LEF1, MYL4, NFKBIA, OPN1SW, PLCE1, PLCG1, PLN, PRKCA, TTN</i> |
| Death Receptor Signaling            | $6.9 \times 10^{-5}$ | 0.012      | 8/92         | <i>ACTA2, ART1, CRADD, FADD, FAS, LIMK1, NFKBIA, TNFRSF1A</i>                                                                             |
| Wnt/Ca+ pathway                     | $2.2 \times 10^{-4}$ | 0.019      | 6/56         | <i>AXIN1, CREB5, DVL1, PLCE1, PLCG1, PRKCA</i>                                                                                            |
| P2Y Purigenic Receptor Signaling    | $4.1 \times 10^{-4}$ | 0.028      | 8/119        | <i>ADCY8, CREB5, GNB4, ITGB3, OPN1SW, PLCE1, PLCG1, PRKCA</i>                                                                             |

FDR: False discovery rate; Ratio: number of molecules in a given pathway that meet cut criteria, divided by total number of molecules that make up that pathway

**Table S 14: Top canonical pathways enriched with echo-related genes from Ingenuity Pathway Analysis: additional informations on gene loci**

| <b>Gene</b>     | <b>Length</b> | <b>Most significant SNP<br/>within gene region</b> | <b>Locus</b> |
|-----------------|---------------|----------------------------------------------------|--------------|
| <i>ACTA2</i>    | 56317         | rs2862834                                          | 10q23.31     |
| <i>ADCY8</i>    | 260289        | rs263255                                           | 8q24.22      |
| <i>ART1</i>     | 19286         | rs7103680                                          | 11p15.4      |
| <i>AXIN1</i>    | 65237         | rs2685127                                          | 16p13.3      |
| <i>CAMK2B</i>   | 108482        | rs7804804                                          | 7p13         |
| <i>CDC27</i>    | 71355         | rs2292864                                          | 17q21.32     |
| <i>CRADD</i>    | 173381        | rs10859579                                         | 12q22        |
| <i>CREB5</i>    | 526572        | rs917275                                           | 7p15.1       |
| <i>DUSP12</i>   | 7372          | rs953301                                           | 1q23.3       |
| <i>DUSP18</i>   | 5834          | rs734479                                           | 22q12.2      |
| <i>DVL1</i>     | 13835         | rs12142199                                         | 1p36.33      |
| <i>FADD</i>     | 4240          | rs7127129                                          | 11q13.3      |
| <i>FAS</i>      | 25255         | rs2862834                                          | 10q23.31     |
| <i>FLNC</i>     | 28846         | rs7786074                                          | 7q32.1       |
| <i>GLI3</i>     | 276071        | rs7782675                                          | 7p14.1       |
| <i>GNB4</i>     | 55496         | rs4855074                                          | 3q26.33      |
| <i>HIST2H3C</i> | 507           | rs532941                                           | 1q21.2       |
| <i>ITGB3</i>    | 58870         | rs2292864                                          | 17q21.32     |
| <i>LEF1</i>     | 121412        | rs7665502                                          | 4q25         |
| <i>LIMK1</i>    | 38749         | rs4717863                                          | 7q11.23      |
| <i>MYL4</i>     | 14618         | rs3892085                                          | 17q21.32     |
| <i>NFKBIA</i>   | 3245          | rs8019505                                          | 14q13.2      |
| <i>OPN1SW</i>   | 3302          | rs7786074                                          | 7q32.1       |
| <i>PLCE1</i>    | 239319        | rs3758524                                          | 10q23.33     |
| <i>PLCG1</i>    | 38197         | rs2866372                                          | 20q12        |
| <i>PLN</i>      | 12146         | rs11967375                                         | 6q22.31      |
| <i>PRKCA</i>    | 507937        | rs6504434                                          | 17q24.2      |
| <i>TNFRSF1A</i> | 13361         | rs7958488                                          | 12p13.31     |
| <i>TTN</i>      | 281432        | rs12052983                                         | 2q31.2       |

**Table S 15: DEPICT**

Results of the DEPICT analyses are summarized in the Supplemental Excel file  
“Supplemental Table 15.xlsx”

**Table S 16: Cis eQTL analyses of whole blood and monocytic gene expression data**

| SNP        | Chr | Effect |              | Gene Name           | P value                    | P value                    |
|------------|-----|--------|--------------|---------------------|----------------------------|----------------------------|
|            |     | Allele | Illumina_ID  |                     | WESTRA<br>Whole Blood      | GHS<br>Monocytes           |
| rs10774625 | 12  | A      | ILMN_1743829 | <i>ATXN2</i>        | (-) $2.3 \times 10^{-3}$   | NS                         |
|            |     |        | ILMN_1752046 | <b><i>SH2B3</i></b> | (+) $8.2 \times 10^{-20}$  | (+) $1.8 \times 10^{-4}$   |
| rs12440869 | 15  | T      | ILMN_1655311 | <i>C15orf61</i>     | (+) $7.2 \times 10^{-7}$   | NS                         |
|            |     |        | ILMN_1682738 | <i>SMAD3</i>        | (-) $8.2 \times 10^{-13}$  | NS                         |
| rs17608766 | 17  | C      | ILMN_1815495 | <i>LOC644391</i>    | (+) $1.3 \times 10^{-9}$   | NS                         |
|            |     |        | ILMN_1722812 | <i>GOSR2</i>        | (-) $6.4 \times 10^{-6}$   | NS                         |
|            |     |        | ILMN_1656293 | <i>GOSR2</i>        | (+) $2.0 \times 10^{-3}$   | NS                         |
|            |     |        | ILMN_1680353 | <i>NSF</i>          | (+) $2.3 \times 10^{-4}$   | NS                         |
| rs17696696 | 16  | T      | ILMN_1657139 | <i>ADAT1</i>        | (+) $5.7 \times 10^{-6}$   | NS                         |
|            |     |        | ILMN_1800837 | <b><i>CFDP1</i></b> | (+) $6.2 \times 10^{-11}$  | (+) $7.6 \times 10^{-5}$   |
| rs2649     | 15  | T      | ILMN_1786211 | <i>HERC1</i>        | (+) $1.6 \times 10^{-3}$   | NS                         |
| rs7127129  | 11  | G      | ILMN_1758658 | <b><i>FADD</i></b>  | (+) $1.6 \times 10^{-37}$  | (+) $2.7 \times 10^{-4}$   |
| rs806322   | 13  | G      | ILMN_2043918 | <i>DLEU1</i>        | (+) $1.4 \times 10^{-5}$   | NS                         |
| rs11153730 | 6   | C      | ILMN_1904851 | <i>C6orf204</i>     | (+) $8.36 \times 10^{-22}$ | NS                         |
|            |     |        | ILMN_2270100 | <i>C6orf204</i>     | (+) $3.01 \times 10^{-05}$ | NS                         |
|            |     |        | ILMN_1855286 | <i>CEP85L</i>       | (+) $3.46 \times 10^{-04}$ | NS                         |
| rs1532292  | 17  | T      | ILMN_1753515 | <b><i>SRR</i></b>   | (-) $3.40 \times 10^{-20}$ | (-) $4.63 \times 10^{-10}$ |

Results from the eQTL analysis of SNPs identified in GWAS meta-analysis. Cis was defined as 250kb upstream/downstream of the respective SNP. (+) /(-) specify the effect directions of the eQTL with respect to the Effect Allele. A significance threshold of 0.01/15 ( $p=6.6 \times 10^{-4}$ ) was used to adjust for multiple testing.

**Table S 17: Significant eQTLs in the Genotype-Tissue Expression (GTEx) database**

| SNP ID     | Gencode ID         | Gene Symbol   | Effect allele | P value  | Effect size | Tissue                              |
|------------|--------------------|---------------|---------------|----------|-------------|-------------------------------------|
| rs17696696 | ENSG00000261783.1  | RP11-252K23.2 | G             | 2.00E-23 | -0.77       | Cells - Transformed fibroblasts     |
| rs17696696 | ENSG00000261783.1  | RP11-252K23.2 | G             | 2.50E-22 | -0.69       | Thyroid                             |
| rs17696696 | ENSG00000261783.1  | RP11-252K23.2 | G             | 1.70E-20 | -0.87       | Adipose - Visceral (Omentum)        |
| rs17696696 | ENSG00000153774.4  | CFDP1         | G             | 6.20E-17 | -0.34       | Cells - Transformed fibroblasts     |
| rs17696696 | ENSG00000050820.12 | BCAR1         | G             | 8.40E-17 | -0.48       | Esophagus - Mucosa                  |
| rs17696696 | ENSG00000261783.1  | RP11-252K23.2 | G             | 3.10E-16 | -0.72       | Artery - Aorta                      |
| rs17696696 | ENSG00000261783.1  | RP11-252K23.2 | G             | 8.80E-16 | -0.63       | Esophagus - Mucosa                  |
| rs17696696 | ENSG00000261783.1  | RP11-252K23.2 | G             | 1.60E-15 | -0.59       | Lung                                |
| rs17696696 | ENSG00000261783.1  | RP11-252K23.2 | G             | 5.70E-15 | -0.58       | Artery - Tibial                     |
| rs17696696 | ENSG00000261783.1  | RP11-252K23.2 | G             | 6.80E-15 | -0.58       | Nerve - Tibial                      |
| rs17696696 | ENSG00000261783.1  | RP11-252K23.2 | G             | 2.70E-14 | -0.52       | Adipose - Subcutaneous              |
| rs17696696 | ENSG00000261783.1  | RP11-252K23.2 | G             | 1.60E-10 | -0.58       | Esophagus - Muscularis              |
| rs17696696 | ENSG00000050820.12 | BCAR1         | G             | 1.70E-10 | 0.26        | Artery - Aorta                      |
| rs17696696 | ENSG00000261783.1  | RP11-252K23.2 | G             | 6.90E-10 | -0.69       | Adrenal Gland                       |
| rs17696696 | ENSG00000050820.12 | BCAR1         | G             | 7.30E-10 | 0.19        | Artery - Tibial                     |
| rs17696696 | ENSG00000261783.1  | RP11-252K23.2 | G             | 1.30E-09 | -0.72       | Pancreas                            |
| rs17696696 | ENSG00000261783.1  | RP11-252K23.2 | G             | 1.30E-09 | -0.45       | Skin - Sun Exposed (Lower leg)      |
| rs17696696 | ENSG00000261783.1  | RP11-252K23.2 | G             | 2.00E-09 | -0.56       | Breast - Mammary Tissue             |
| rs17696696 | ENSG00000261783.1  | RP11-252K23.2 | G             | 1.50E-08 | -0.43       | Whole Blood                         |
| rs17696696 | ENSG00000261783.1  | RP11-252K23.2 | G             | 1.60E-08 | -0.62       | Artery - Coronary                   |
| rs17696696 | ENSG00000153774.4  | CFDP1         | G             | 1.10E-07 | -0.19       | Adipose - Subcutaneous              |
| rs17696696 | ENSG00000261783.1  | RP11-252K23.2 | G             | 2.50E-07 | -0.63       | Vagina                              |
| rs17696696 | ENSG00000261783.1  | RP11-252K23.2 | G             | 3.00E-07 | -0.63       | Colon - Sigmoid                     |
| rs17696696 | ENSG00000261783.1  | RP11-252K23.2 | G             | 5.10E-07 | -0.72       | Brain - Cerebellar Hemisphere       |
| rs17696696 | ENSG00000261783.1  | RP11-252K23.2 | G             | 5.30E-07 | -0.64       | Prostate                            |
| rs17696696 | ENSG00000166822.8  | TMEM170A      | G             | 6.30E-07 | 0.23        | Skin - Sun Exposed (Lower leg)      |
| rs17696696 | ENSG00000261783.1  | RP11-252K23.2 | G             | 1.40E-06 | -0.53       | Stomach                             |
| rs17696696 | ENSG00000153774.4  | CFDP1         | G             | 1.70E-06 | -0.17       | Skin - Sun Exposed (Lower leg)      |
| rs17696696 | ENSG00000153774.4  | CFDP1         | G             | 1.80E-06 | -0.41       | Brain - Hippocampus                 |
| rs17696696 | ENSG00000166822.8  | TMEM170A      | G             | 2.00E-06 | -0.21       | Nerve - Tibial                      |
| rs17696696 | ENSG00000261783.1  | RP11-252K23.2 | G             | 4.00E-06 | -0.47       | Colon - Transverse                  |
| rs17696696 | ENSG00000153774.4  | CFDP1         | G             | 6.10E-06 | -0.17       | Nerve - Tibial                      |
| rs7127129  | ENSG00000254721.1  | RP11-805J14.5 | G             | 5.40E-10 | 0.23        | Cells - Transformed fibroblasts     |
| rs7127129  | ENSG00000168040.4  | FADD          | G             | 2.10E-09 | 0.22        | Cells - Transformed fibroblasts     |
| rs17608766 | ENSG00000179673.3  | RPRML         | C             | 1.60E-10 | -0.56       | Muscle - Skeletal                   |
| rs17608766 | ENSG00000179673.3  | RPRML         | C             | 3.00E-05 | -0.44       | Adipose - Subcutaneous              |
| rs11207426 | ENSG00000224609.2  | RP11-470E16.1 | A             | 7.20E-21 | 0.68        | Artery - Tibial                     |
| rs11207426 | ENSG00000224609.2  | RP11-470E16.1 | A             | 8.00E-16 | 0.49        | Adipose - Subcutaneous              |
| rs11207426 | ENSG00000224609.2  | RP11-470E16.1 | A             | 4.20E-15 | 0.62        | Artery - Aorta                      |
| rs11207426 | ENSG00000224609.2  | RP11-470E16.1 | A             | 7.90E-15 | 0.56        | Nerve - Tibial                      |
| rs11207426 | ENSG00000224609.2  | RP11-470E16.1 | A             | 6.70E-12 | 0.5         | Skin - Sun Exposed (Lower leg)      |
| rs11207426 | ENSG00000224609.2  | RP11-470E16.1 | A             | 8.90E-08 | 0.53        | Artery - Coronary                   |
| rs11207426 | ENSG00000224609.2  | RP11-470E16.1 | A             | 1.50E-07 | -0.23       | Muscle - Skeletal                   |
| rs11207426 | ENSG00000224609.2  | RP11-470E16.1 | A             | 2.00E-07 | 0.51        | Skin - Not Sun Exposed (Suprapubic) |
| rs11207426 | ENSG00000224609.2  | RP11-470E16.1 | A             | 2.20E-07 | 0.43        | Breast - Mammary Tissue             |
| rs12541595 | ENSG00000170873.14 | MTS1          | T             | 7.00E-18 | -0.61       | Heart - Left Ventricle              |
| rs12541595 | ENSG00000249816.2  | LINC00964     | T             | 7.00E-11 | -0.53       | Heart - Left Ventricle              |
| rs10774625 | ENSG00000111275.8  | ALDH2         | G             | 1.00E-08 | -0.26       | Skin - Sun Exposed (Lower leg)      |
| rs12440869 | ENSG00000103591.8  | AAGAB         | T             | 1.30E-06 | -0.19       | Esophagus - Muscularis              |
| rs1532292  | ENSG00000236838.2  | AC090617.1    | G             | 3.50E-11 | 0.78        | Testis                              |
| rs1532292  | ENSG00000167720.8  | SRR           | G             | 2.50E-10 | 0.33        | Cells - Transformed fibroblasts     |
| rs1532292  | ENSG00000167720.8  | SRR           | G             | 7.70E-10 | 0.38        | Adipose - Subcutaneous              |
| rs1532292  | ENSG00000141258.8  | SGSM2         | G             | 7.20E-09 | -0.21       | Esophagus - Mucosa                  |
| rs1532292  | ENSG00000167720.8  | SRR           | G             | 8.00E-09 | 0.42        | Adrenal Gland                       |

## Supplemental Material: New Genetic variants for Cardiac Structure and Function – EchoGen

|            |                   |                    |   |          |       |                                     |
|------------|-------------------|--------------------|---|----------|-------|-------------------------------------|
| rs1532292  | ENSG00000167720.8 | <i>SRR</i>         | G | 1.00E-08 | 0.37  | Artery - Tibial                     |
| rs1532292  | ENSG00000167720.8 | <i>SRR</i>         | G | 1.10E-08 | 0.41  | Esophagus - Mucosa                  |
| rs1532292  | ENSG00000167720.8 | <i>SRR</i>         | G | 1.70E-08 | 0.34  | Lung                                |
| rs1532292  | ENSG00000167720.8 | <i>SRR</i>         | G | 3.30E-07 | 0.38  | Breast - Mammary Tissue             |
| rs1532292  | ENSG00000167720.8 | <i>SRR</i>         | G | 3.60E-07 | 0.38  | Colon - Transverse                  |
| rs1532292  | ENSG00000167720.8 | <i>SRR</i>         | G | 7.90E-07 | 0.3   | Esophagus - Muscularis              |
| rs1532292  | ENSG00000167720.8 | <i>SRR</i>         | G | 1.40E-06 | 0.42  | Stomach                             |
| rs1532292  | ENSG00000141258.8 | <i>SGSM2</i>       | G | 1.70E-06 | -0.22 | Skin - Sun Exposed (Lower leg)      |
| rs1532292  | ENSG00000167720.8 | <i>SRR</i>         | G | 1.70E-06 | 0.34  | Artery - Aorta                      |
| rs1532292  | ENSG00000141258.8 | <i>SGSM2</i>       | G | 3.80E-06 | -0.23 | Skin - Not Sun Exposed (Suprapubic) |
| rs1532292  | ENSG00000167720.8 | <i>SRR</i>         | G | 4.00E-06 | 0.31  | Thyroid                             |
| rs1532292  | ENSG00000263345.1 | <i>RP1-59D14.5</i> | G | 1.10E-05 | -0.22 | Skin - Sun Exposed (Lower leg)      |
| rs11153730 | ENSG00000217330.1 | <i>SSXP10</i>      | C | 1.10E-10 | 0.36  | Artery - Tibial                     |
| rs11153730 | ENSG00000217330.1 | <i>SSXP10</i>      | C | 9.70E-07 | 0.39  | Artery - Aorta                      |
| rs11153730 | ENSG00000217330.1 | <i>SSXP10</i>      | C | 6.40E-06 | 0.48  | Heart - Atrial Appendage            |

This searches our precalculated eQTLs as generated by Matrix eQTL for tissues having more than 70 samples, using a +/- 1 Mb cis window around the transcript start site (TSS). These results have been filtered using a q-value threshold. More details are presented on the documentation page (Analysis Methods). URL: <http://gtexportal.org/home/>

**Table S 88: Percentage of variance explained by the genome-wide significant SNPs per phenotype in the Rotterdam Study, the Study of Health in Pomerania and the Framingham Heart Study**

| Trait       | RS-I<br>(%) | RS-II<br>(%)         | RS-III<br>(%) | SHIP<br>(%) | FHS<br>(%) | Sample-size<br>weighted<br>mean (%) | Sample-size<br>weighted<br>mean –<br>novel SNPs<br>only (%) |
|-------------|-------------|----------------------|---------------|-------------|------------|-------------------------------------|-------------------------------------------------------------|
| <b>AoD</b>  | 2.7         | 3.0                  | 2.2           | 1.0         | 1.2        | 1.7                                 | 1.0                                                         |
| <b>LVDD</b> | 0.2         | 0.4                  | 0.3           | 0.5         | 0.7        | 0.5                                 | 0.3                                                         |
| <b>Mv-A</b> | 0.4         | 4.0x10 <sup>-4</sup> | 0.2           | 0.2         | 0.4        | 0.2                                 | NA                                                          |

**Table S 19: Explained variance of all autosomal SNPs (MAF  $\geq$  1%) in SHIP**

| Trait   | Explained Variance (%) | SE (%) | P value              | N     |
|---------|------------------------|--------|----------------------|-------|
| AoD     | 29                     | 8.2    | $1.1 \times 10^{-4}$ | 3,458 |
| LA      | 16                     | 8.3    | $2.1 \times 10^{-2}$ | 3,457 |
| LVDD    | 18                     | 9.0    | $1.9 \times 10^{-2}$ | 3,168 |
| LVWT    | 18                     | 8.9    | $1.4 \times 10^{-2}$ | 3,168 |
| LVM     | 12                     | 8.5    | 0.07                 | 3,168 |
| FS      | 17                     | 9.1    | $2.3 \times 10^{-2}$ | 3,116 |
| LVSD    | 8.2                    | 9.3    | 0.19                 | 3,120 |
| Mv-A    | 11                     | 12.2   | 0.18                 | 2,315 |
| DecTime | 16                     | 11.9   | 0.09                 | 2,364 |
| IVRT    | 24                     | 12.2   | $1.9 \times 10^{-2}$ | 2,303 |
| HFpEF   | 20                     | 16.6   | 0.13                 | 1,766 |

AoD= aortic root diameter; LA= left atrial size; LVDD= left ventricular end-diastolic diameter; LVWT= left ventricular wall thickness; LVM= left ventricular mass; FS= left ventricular fractional shortening; LVSD= left ventricular systolic dysfunction; A= peak velocity of the mitral A-wave; DecTime= deceleration time; IVRT= isovolumetric relaxation time; HFpEF= heart failure with preserved ejection fraction; SE= standard error; \* P values are from GCTA analyses.<sup>11</sup> The explained variance for the traits E (peak velocity of the mitral E-wave), E/A (ratio of the peak velocity of the mitral E-Wave divided by the peak velocity of the mitral A-wave) and DDpEF (diastolic dysfunction with preserved ejection fraction) was 0 – therefore the numbers are not displayed in this table. For the traits E' (Peak velocity of the excursion of the lateral mitral annulus in the early diastolic phase) and E/E' (Ratio of the peak velocity of the excursion of the lateral mitral annulus in the early diastolic phase by TDI and the peak velocity of the mitral E-wave by Doppler imaging) no values were calculated due to the low number of samples available in SHIP.

**Figure S 1: QQ plot - AoD.**

$P$  values were obtained by calculating Wald test statistics (sample size:  $n=26,741$ ).

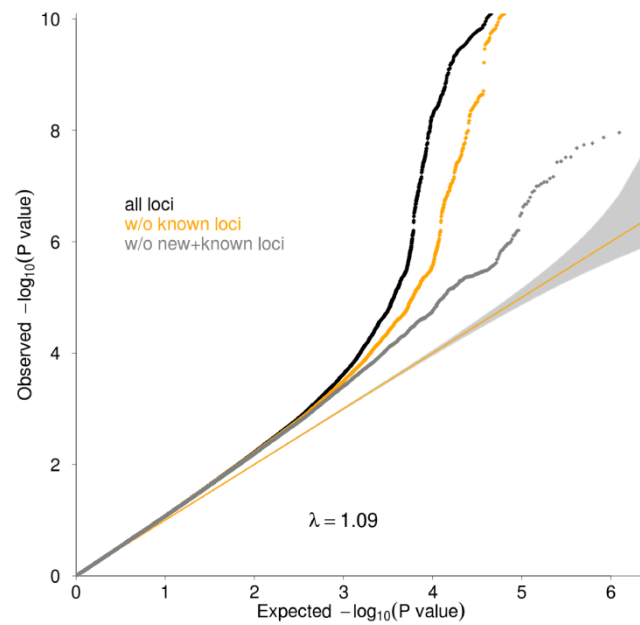

**Figure S 2: QQ plot – LA.**

$P$  values were obtained by calculating Wald test statistics (sample size:  $n=26,189$ ).

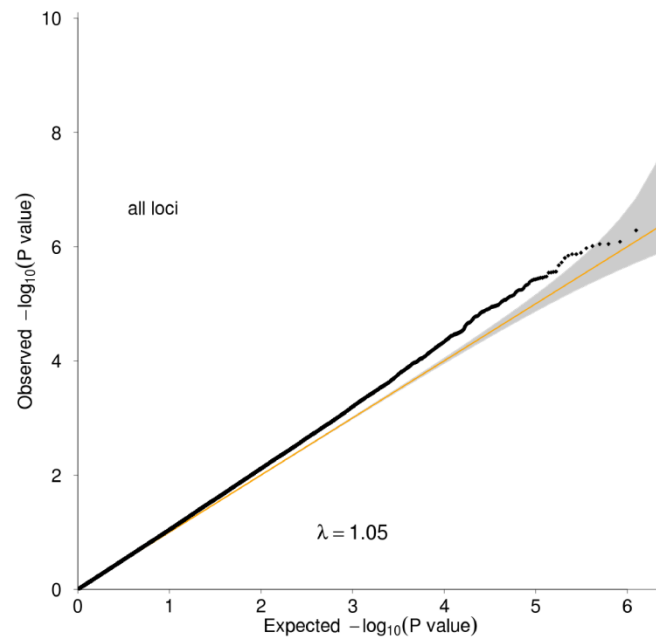

**Figure S 3: QQ plot – LVDD.**

$P$  values were obtained by calculating Wald test statistics (sample size:  $n=30,201$ ).

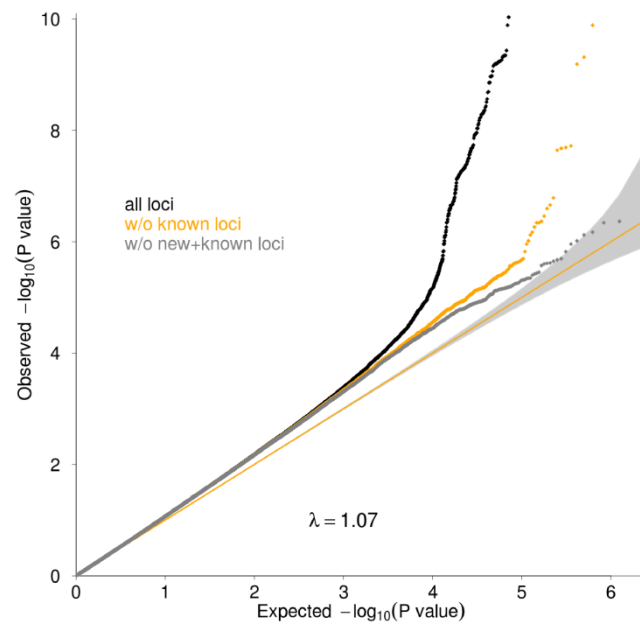

**Figure S 4: QQ plot – LVWT.**

$P$  values were obtained by calculating Wald test statistics (sample size:  $n=30,043$ ).

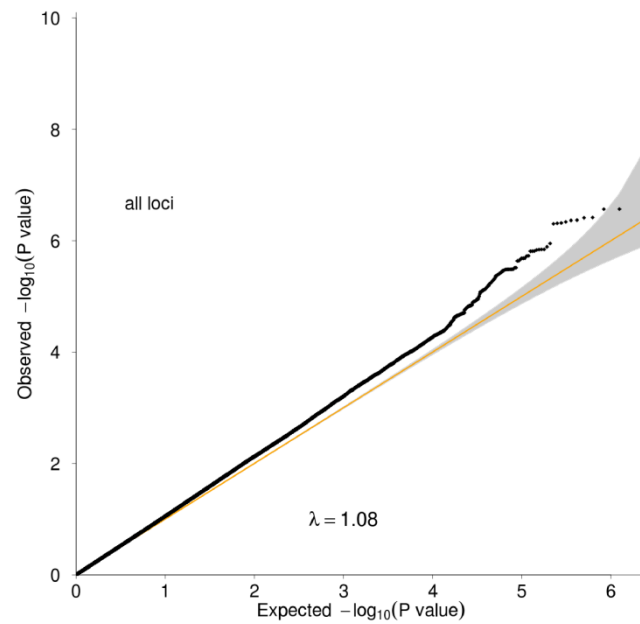

**Figure S 5: QQ plot – LVM.**

*P* values were obtained by calculating Wald test statistics (sample size:  $n=30,142$ ).

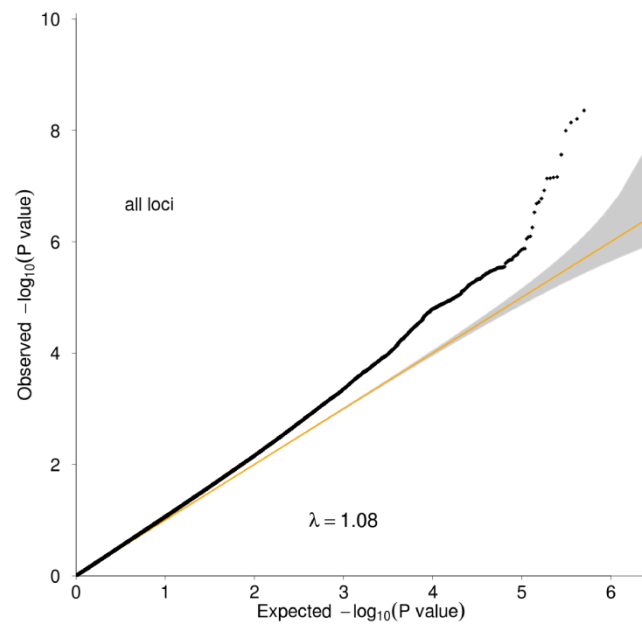

**Figure S 6: QQ plot – FS.**

*P* values were obtained by calculating Wald test statistics (sample size:  $n=28,083$ ).

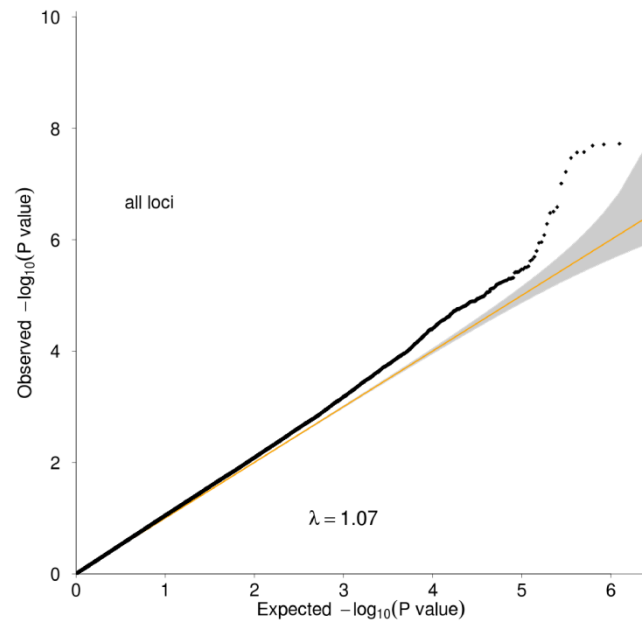

**Figure S 7: LVSD.**

P values were obtained by calculating Wald test (sample size: n=27,864).

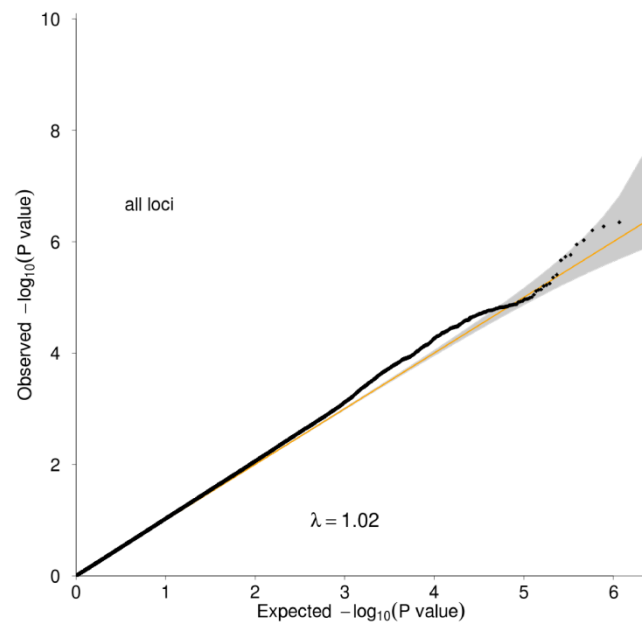

**Figure S 8: QQ plot Mv-E.**

P values were obtained by calculating Wald test (sample size: n=21,852).

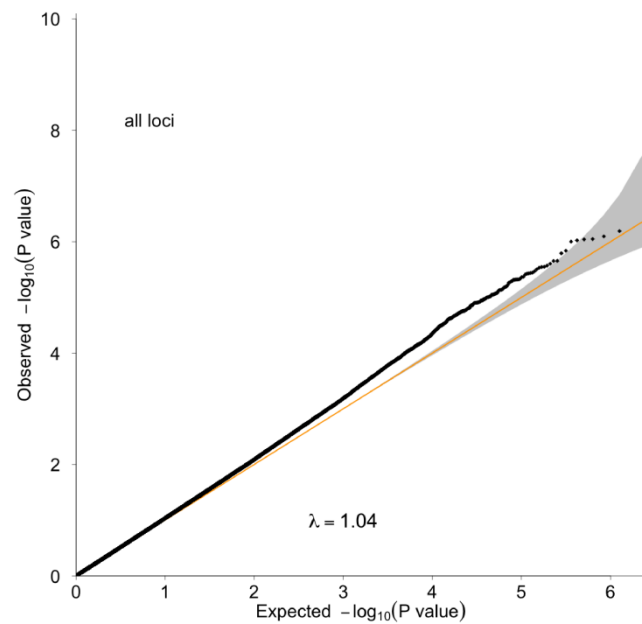

**Figure S 9: QQ plot – Mv-A.**

*P* values were obtained by calculating Wald test statistics (sample size:  $n=21,643$ ).

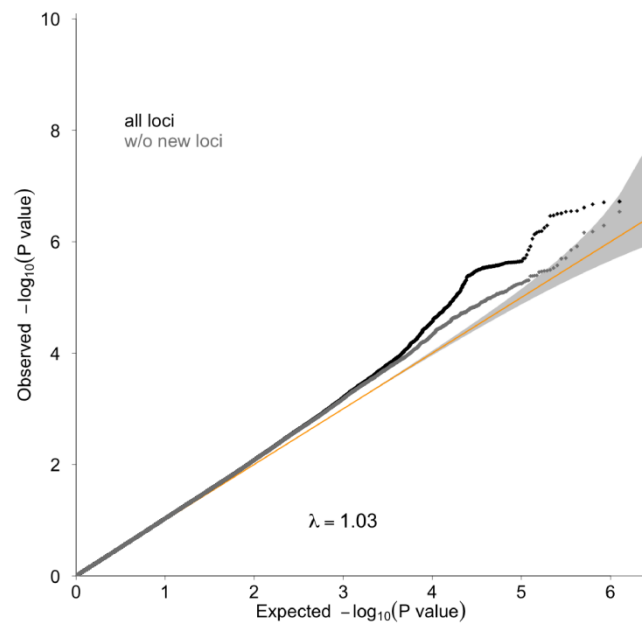

**Figure S 10: QQ plot – E/A.**

*P* values were obtained by calculating Wald test statistics (sample size:  $n=21,348$ ).

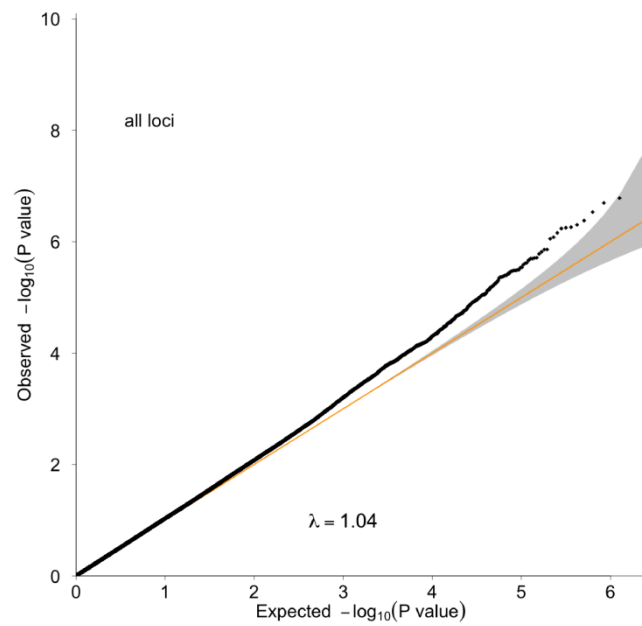

**Figure S 11: QQ plot – DecTime.**

*P* values were obtained by calculating Wald test statistics (sample size:  $n=16,681$ ).

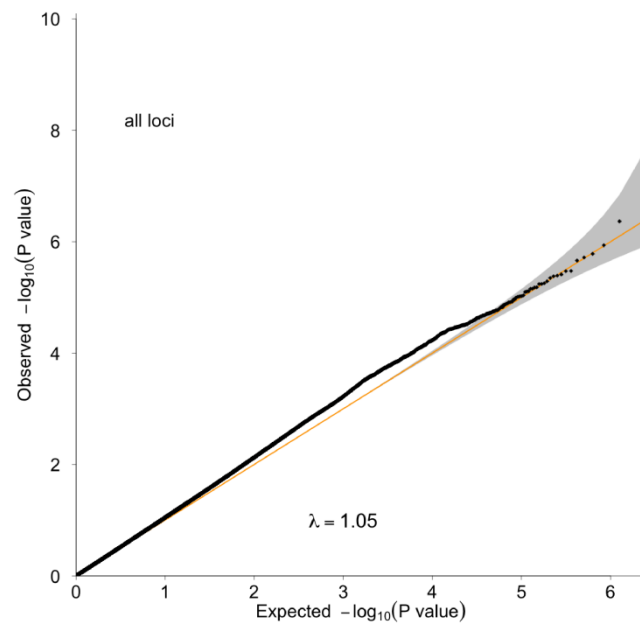

**Figure S 12: QQ plot – IVRT.**

*P* values were obtained by calculating Wald test statistics (sample size:  $n=12,151$ ).

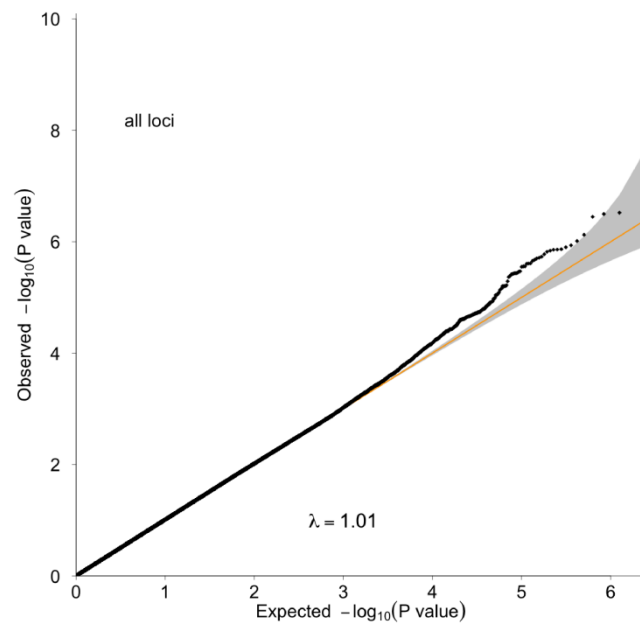

**Figure S 13: QQ plot – E'.**

*P* values were obtained by calculating Wald test statistics (sample size: *n*=8,500).

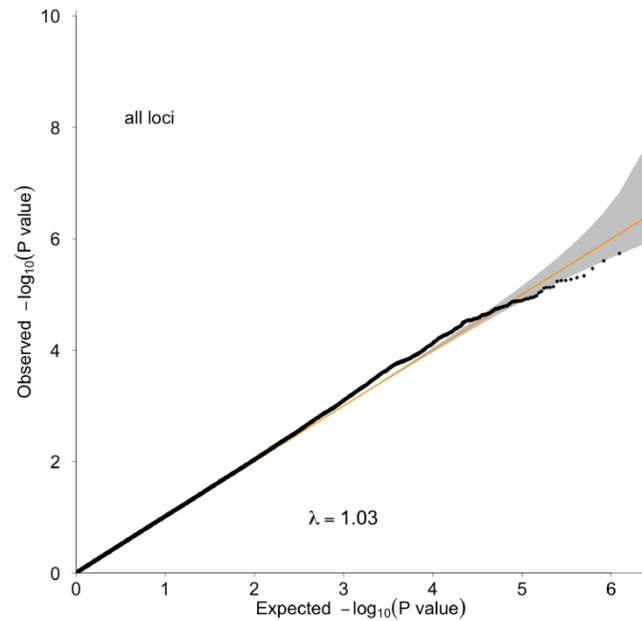

**Figure S 14: QQ plot – E/E'.**

*P* values were obtained by calculating Wald test statistics (sample size: *n*=7,832).

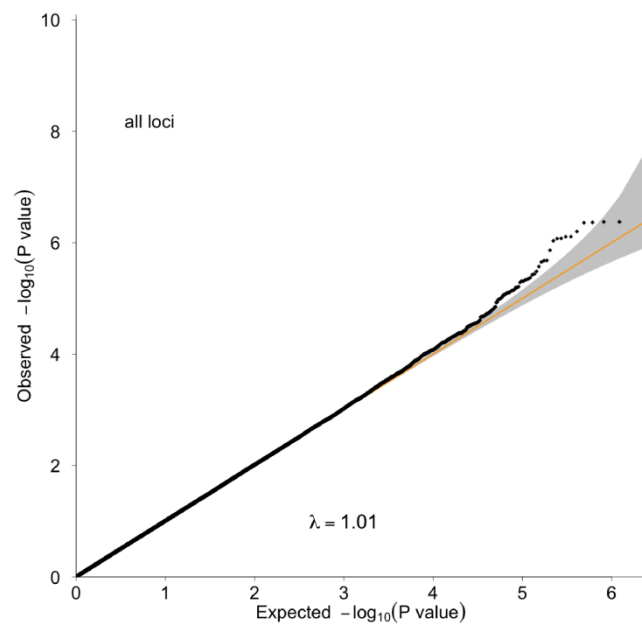

**Figure S 15: QQ plot – DDpEF.**

$P$  values were obtained by calculating Wald test statistics (sample size:  $n=7,262$ ).

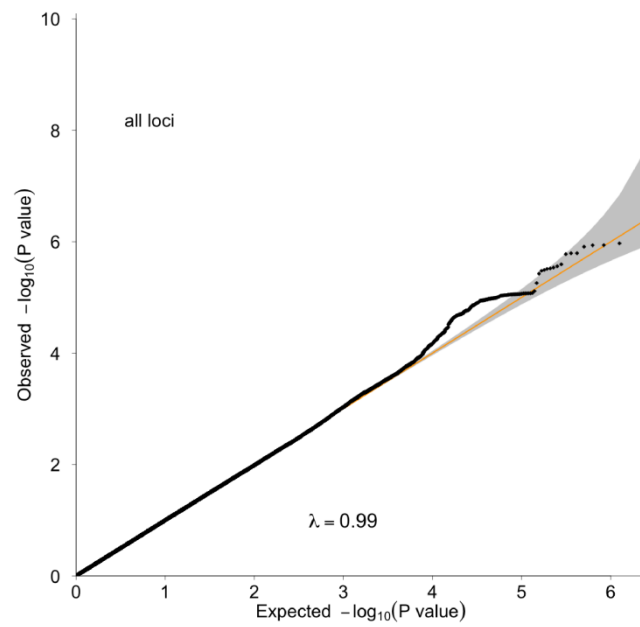

**Figure S 16: QQ plot – HFpEF.**

$P$  values were obtained by calculating Wald test statistics (sample size:  $n=5,297$ ).

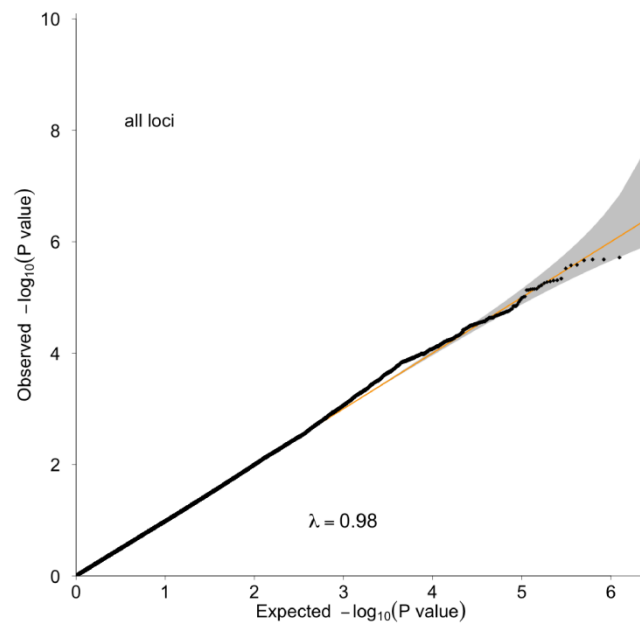

Figure S 17: Forest plots for genome-wide significant hits

## AoD rs806322

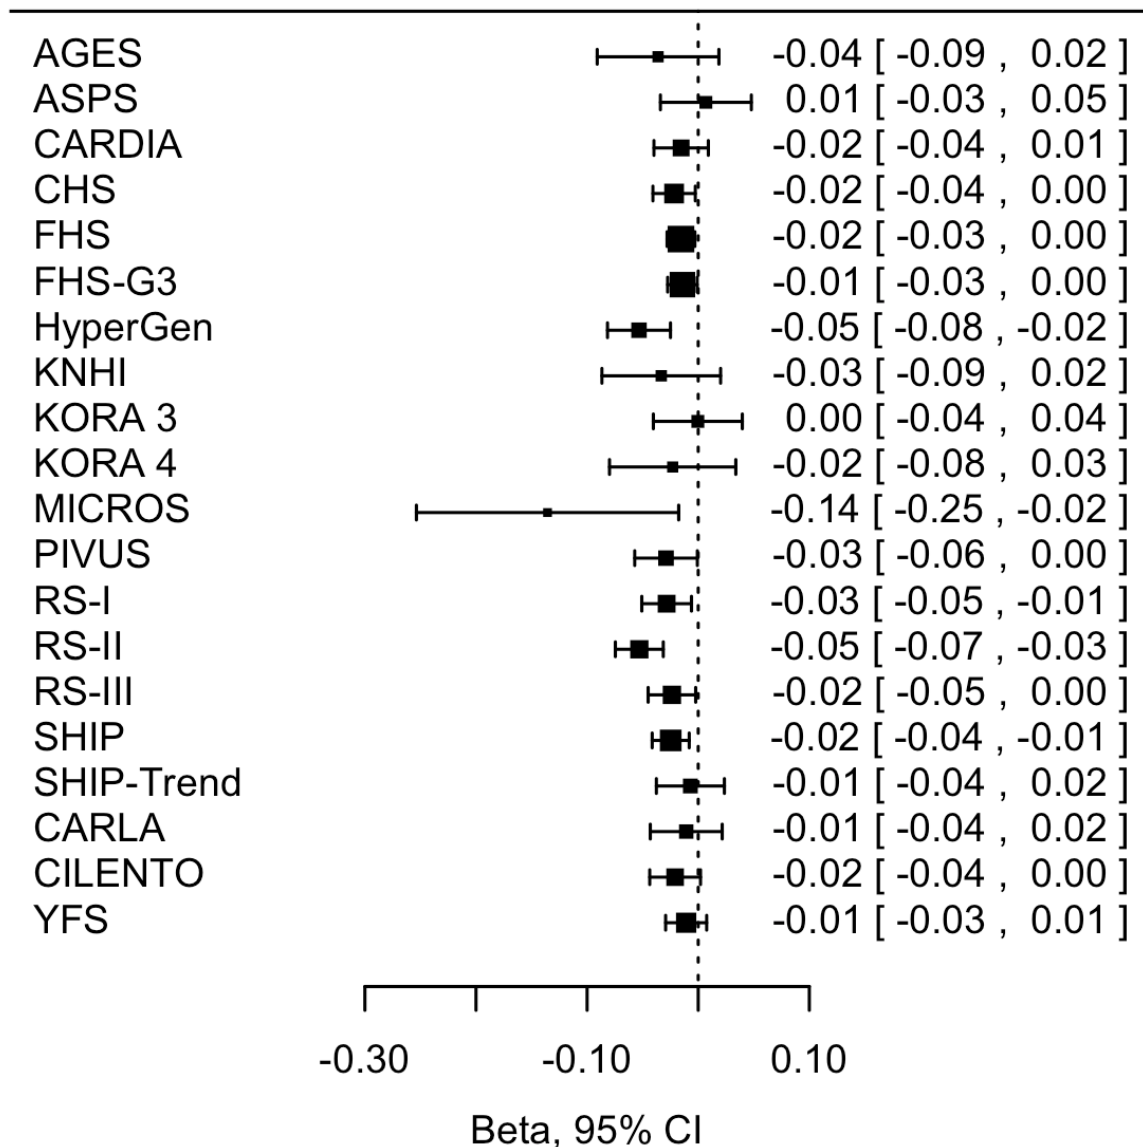

n=30,704

## AoD rs4765663

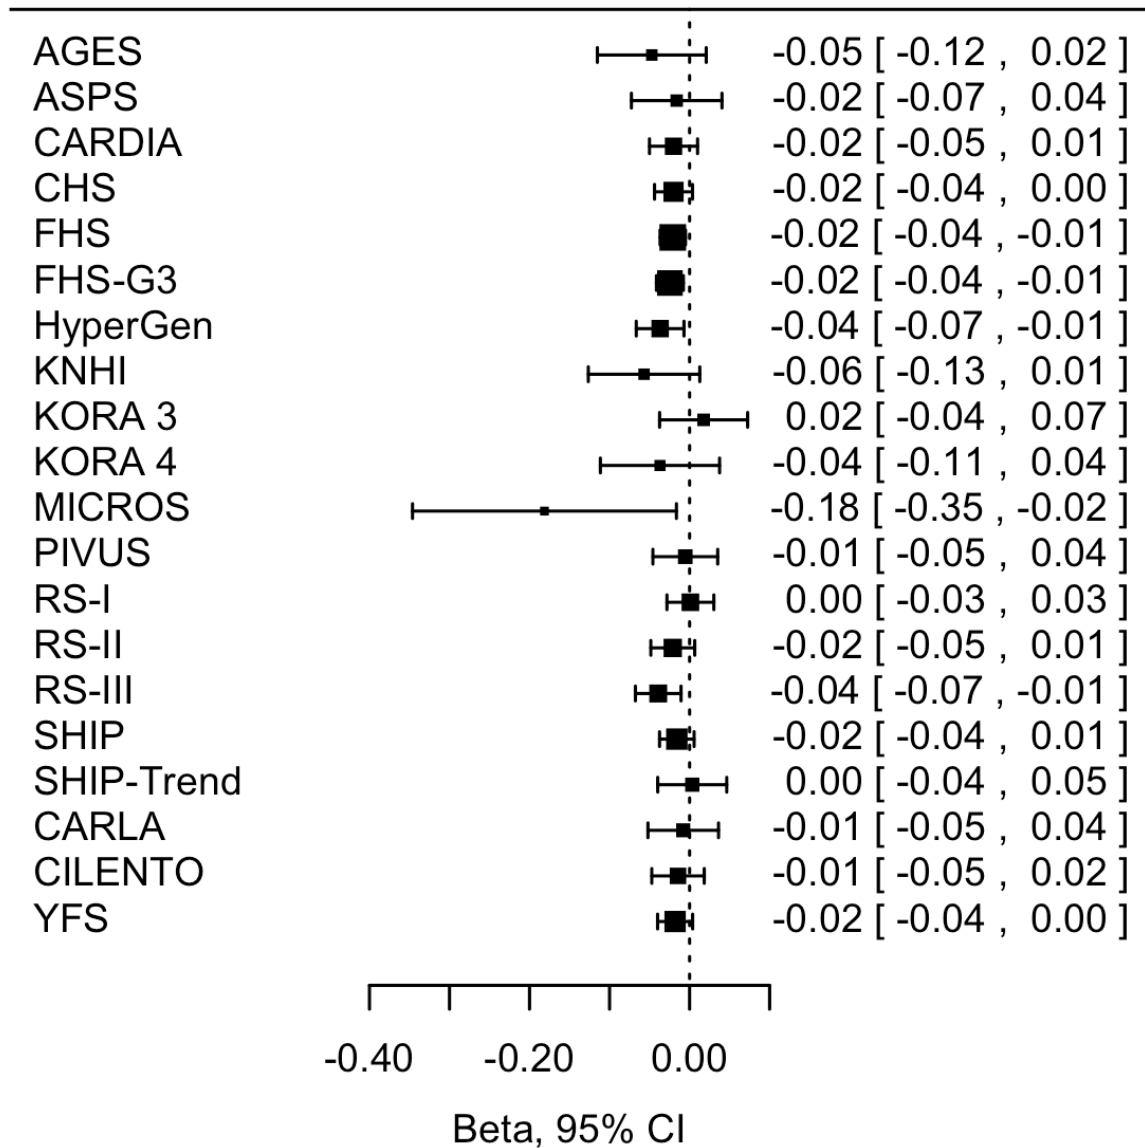

n=30,704

## AoD rs6702619

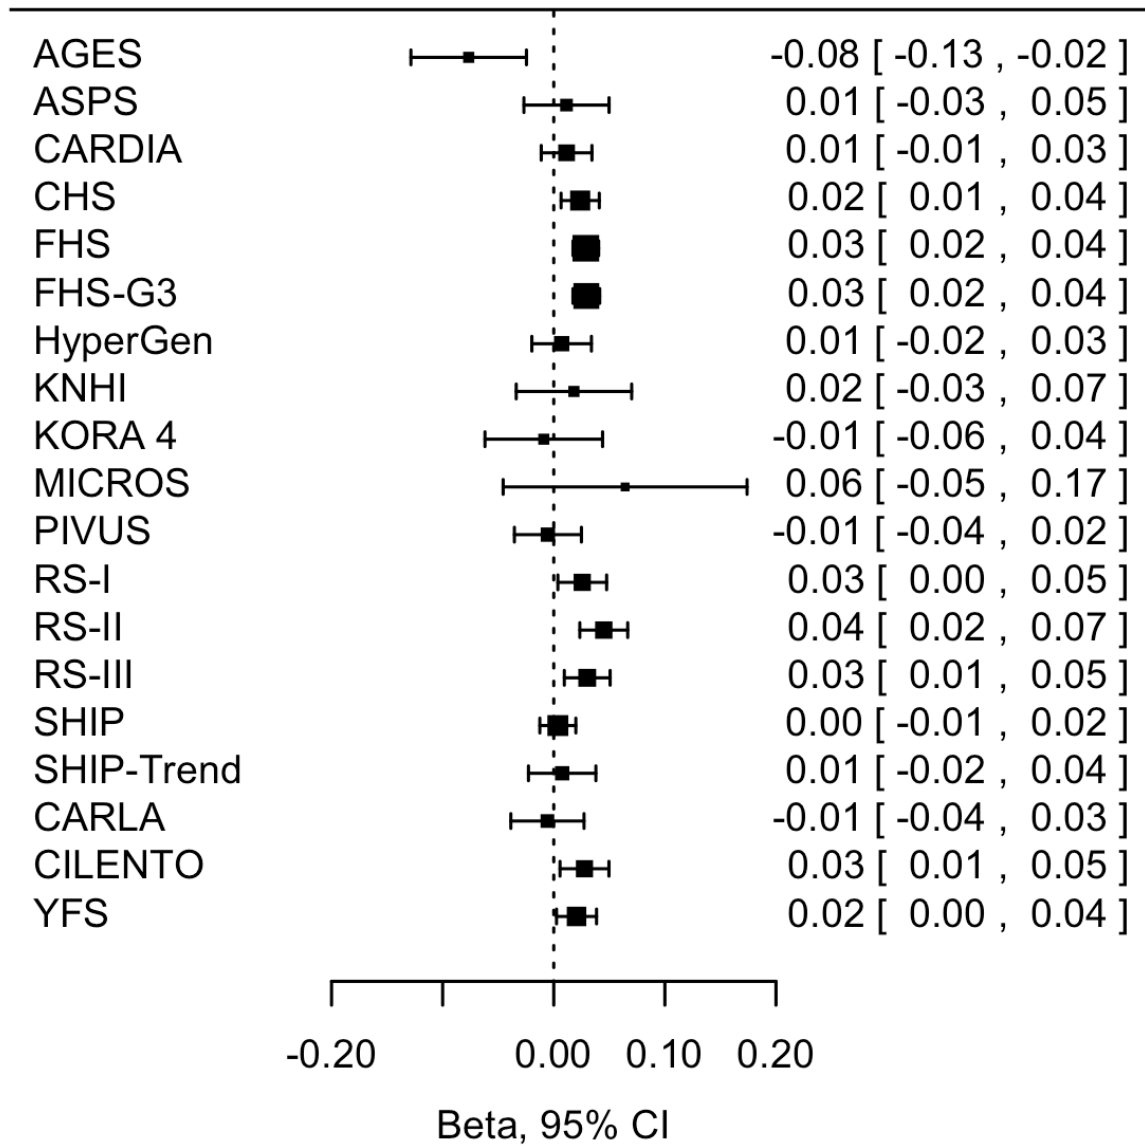

n=30,704

## AoD rs7127129

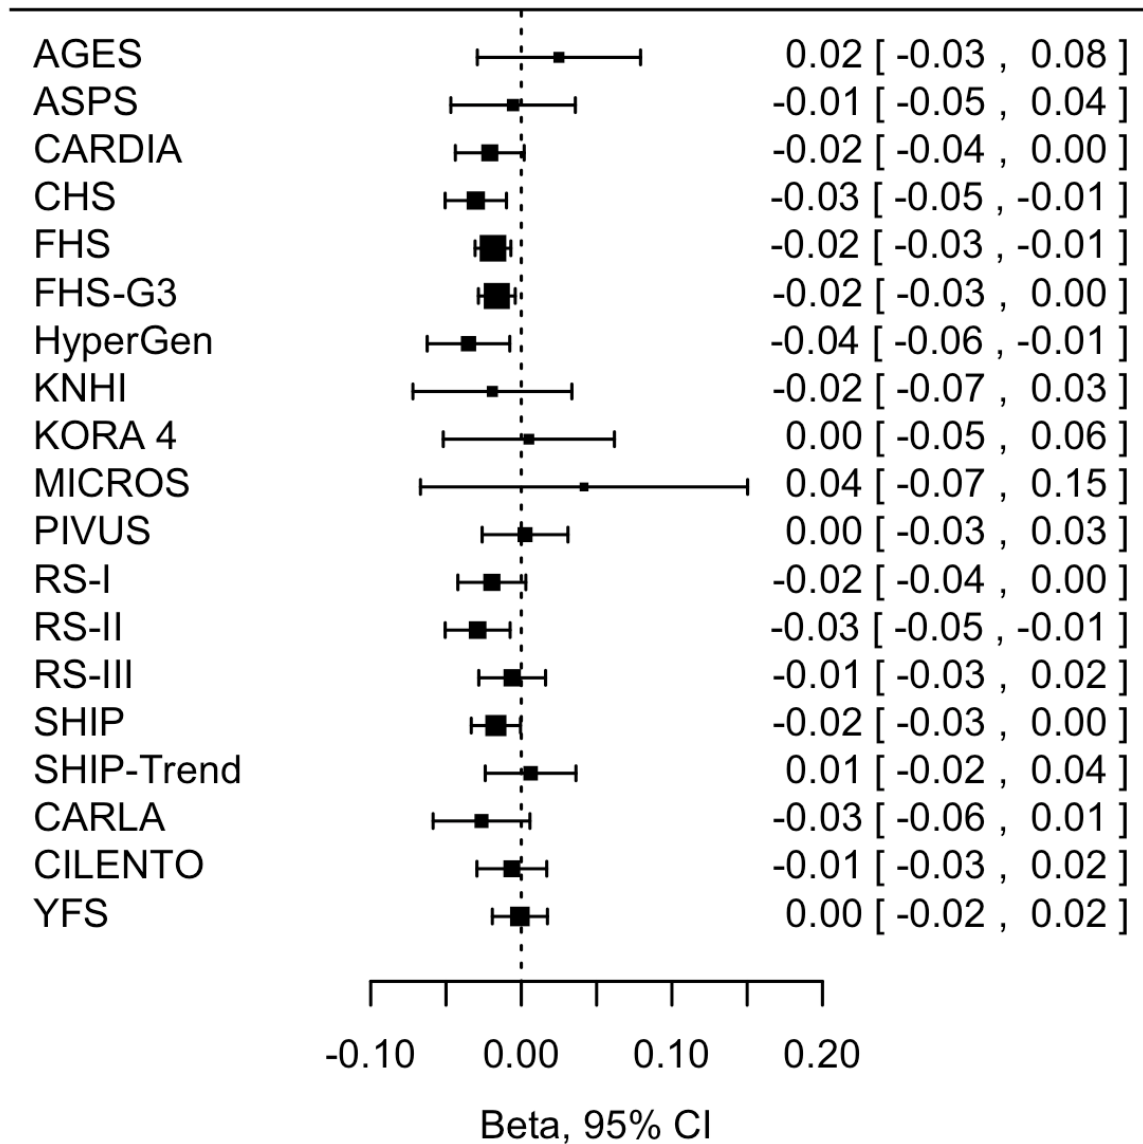

n=30,704

## AoD rs11207426

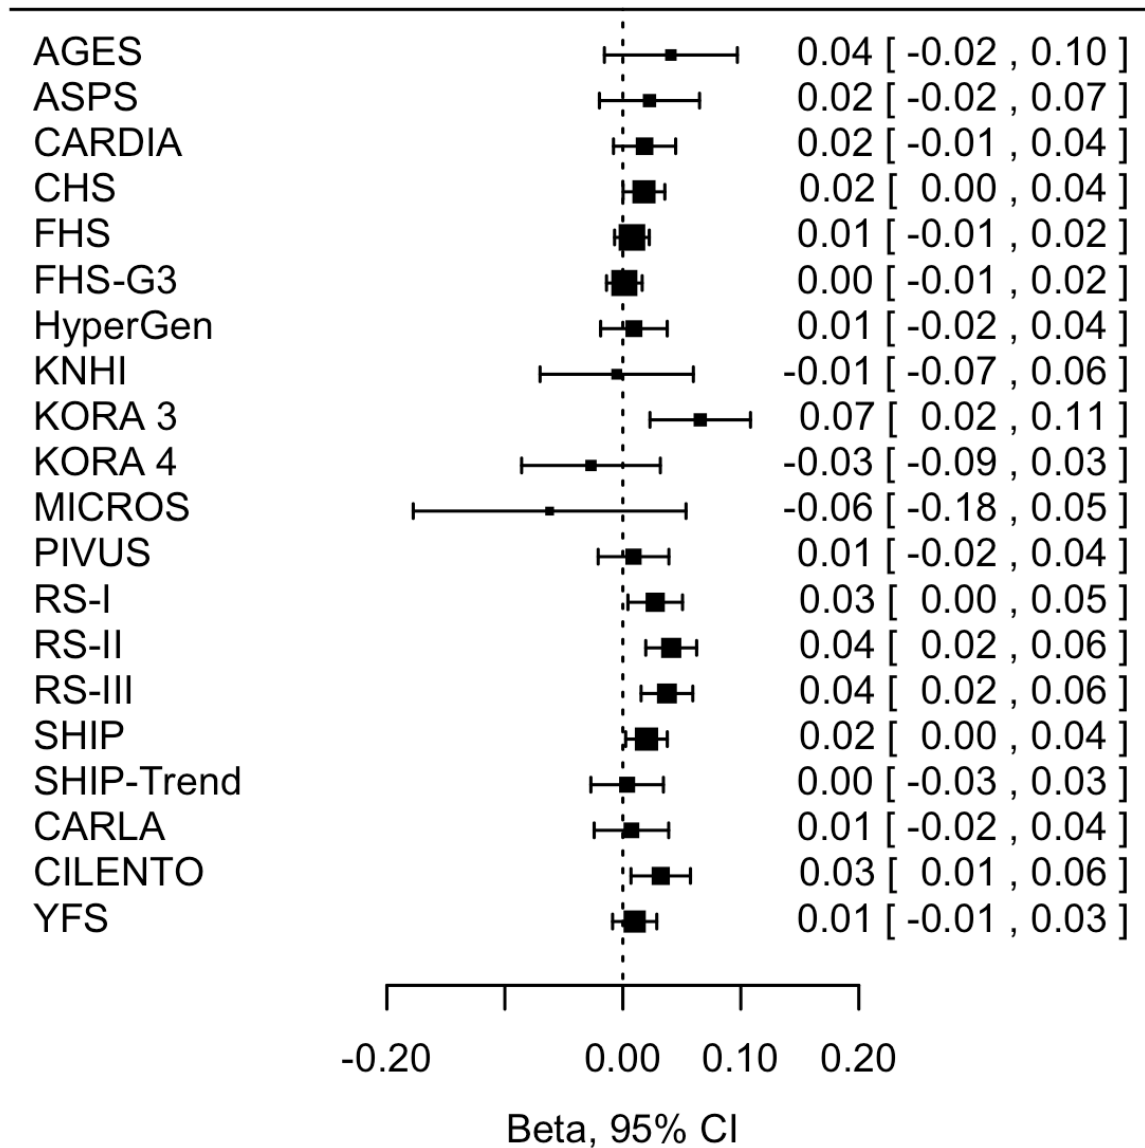

n=30,704

## AoD rs17608766

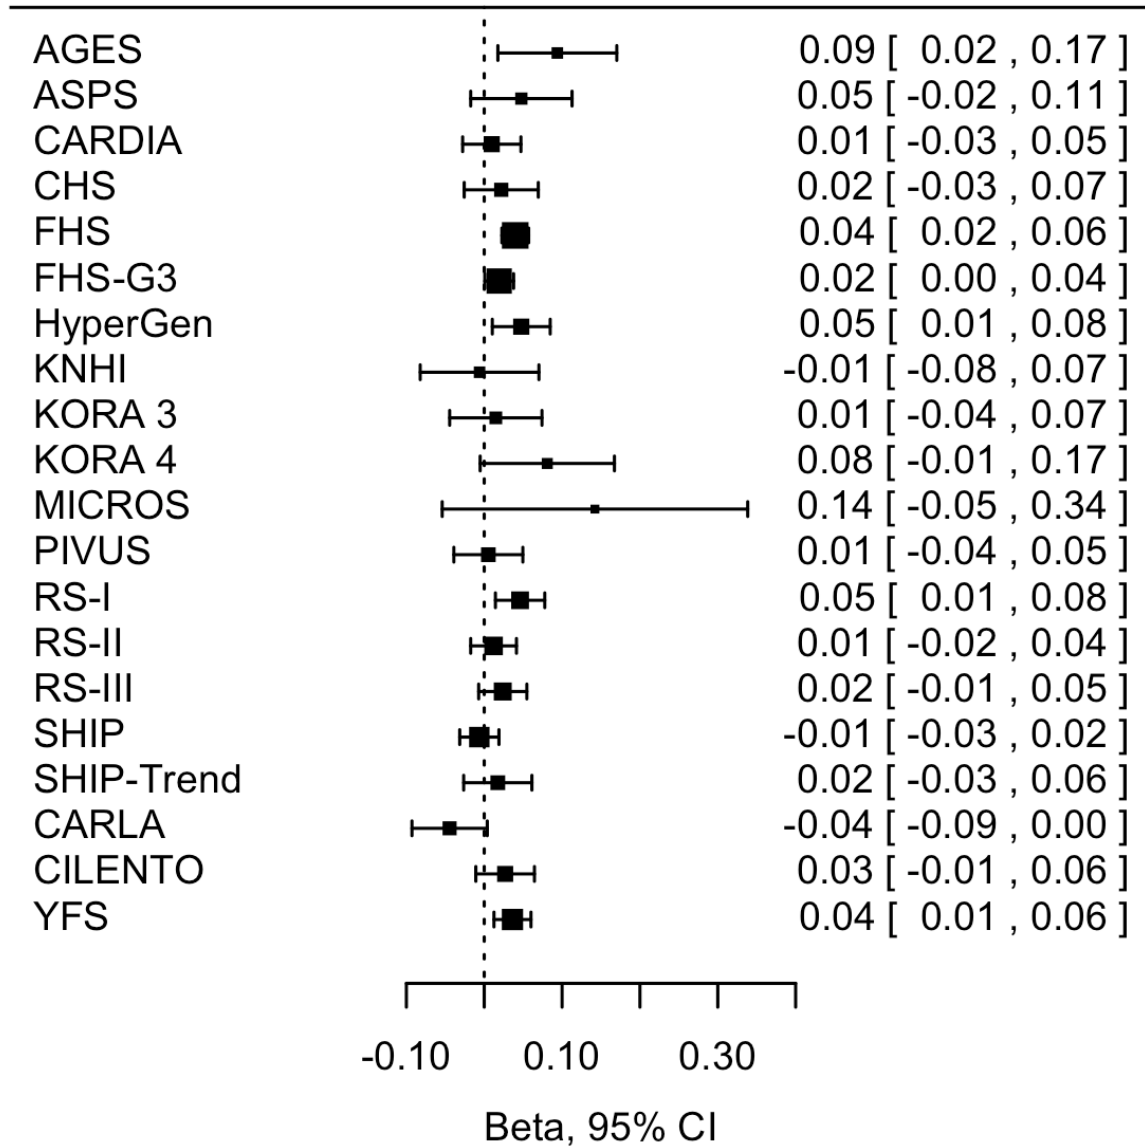

n=30,704

## AoD rs17696696

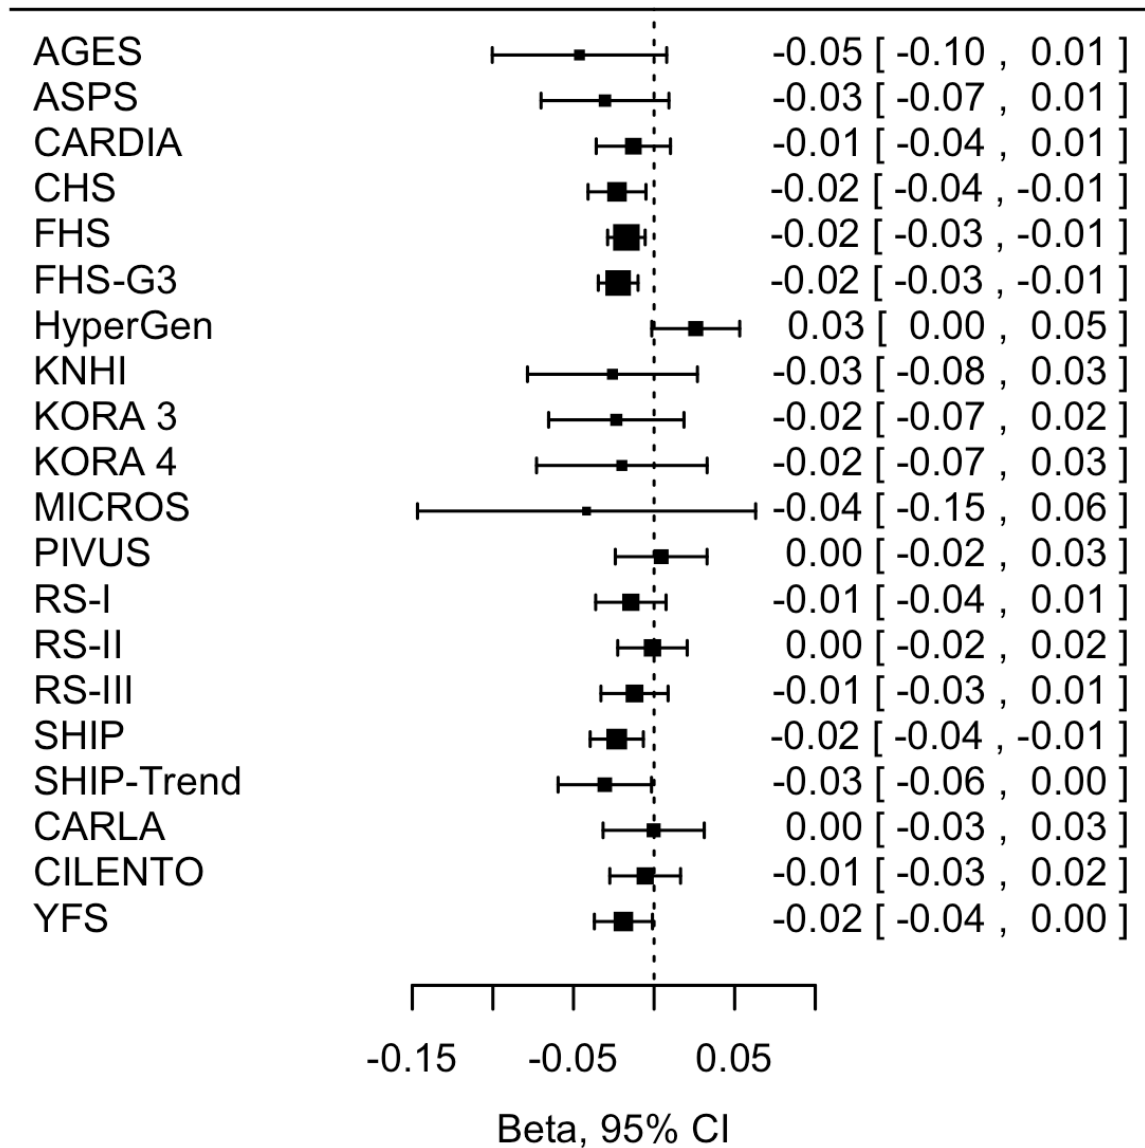

n=30,704

## LVDD rs10774625

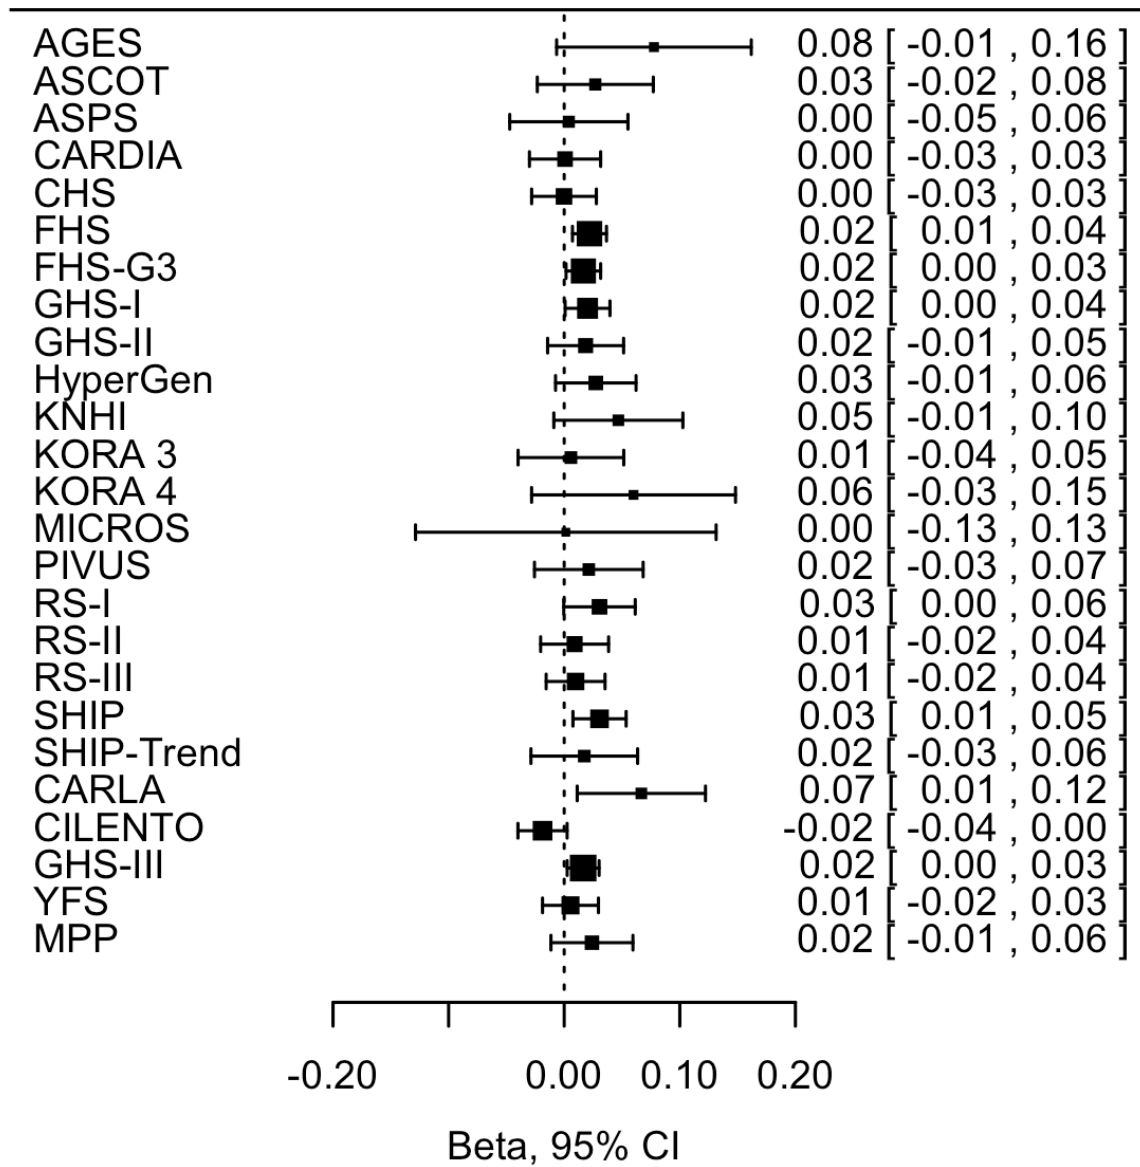

n=43,623

## Mv-A rs12440869

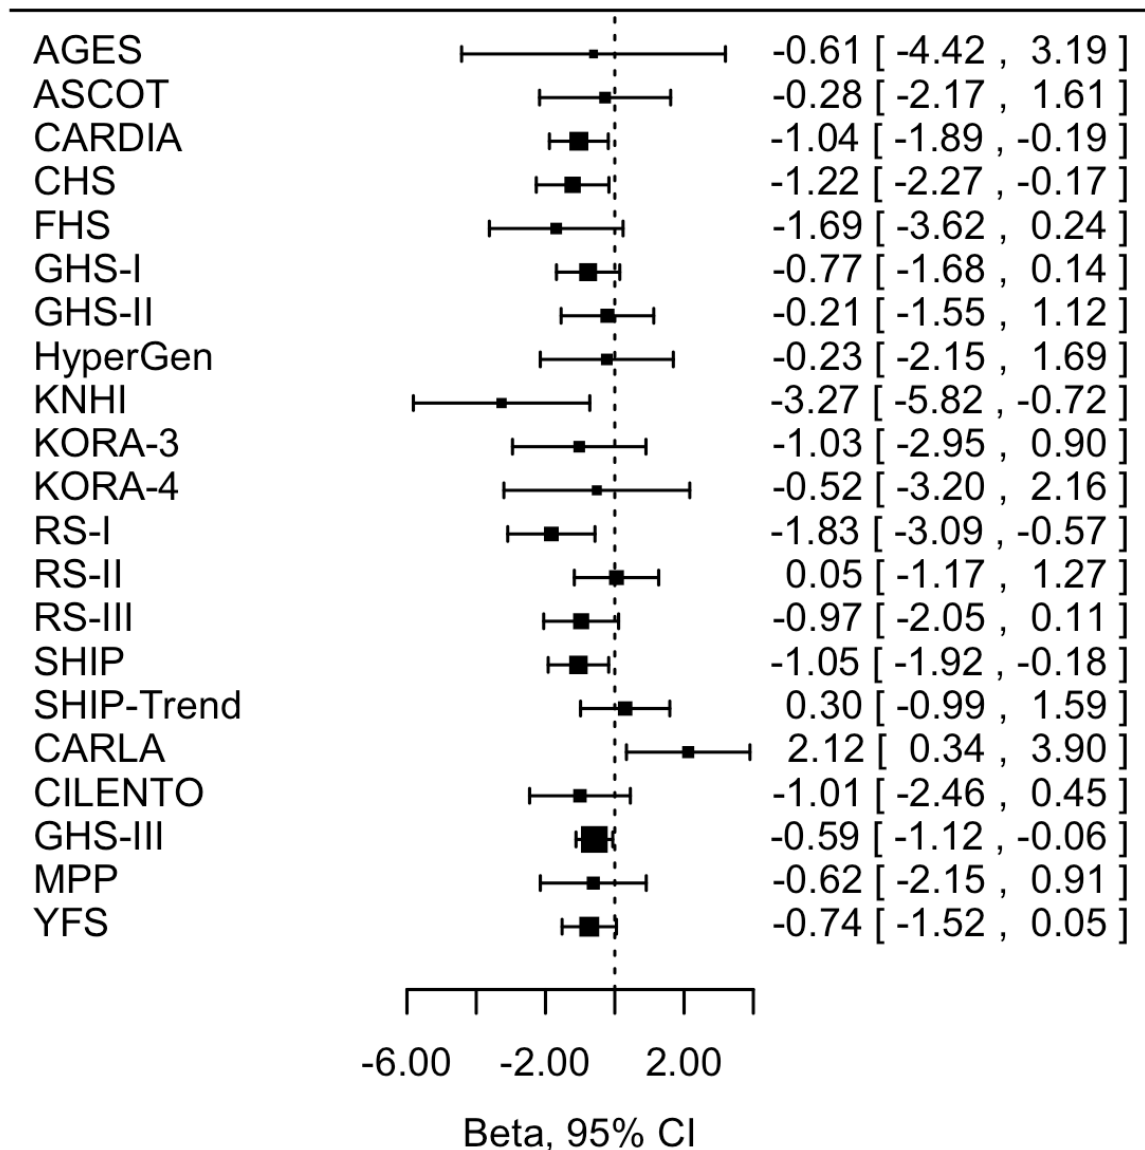

n=36,430

**Figure S 18: Regional plots for all genome-wide significant hits.**

*P* values were obtained by calculating Wald test statistics

**AoD, n=26,741**

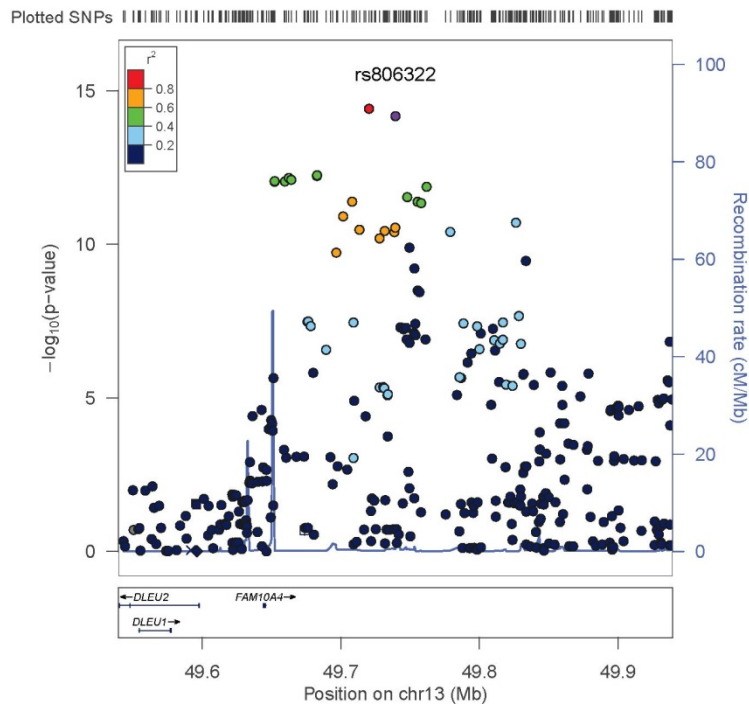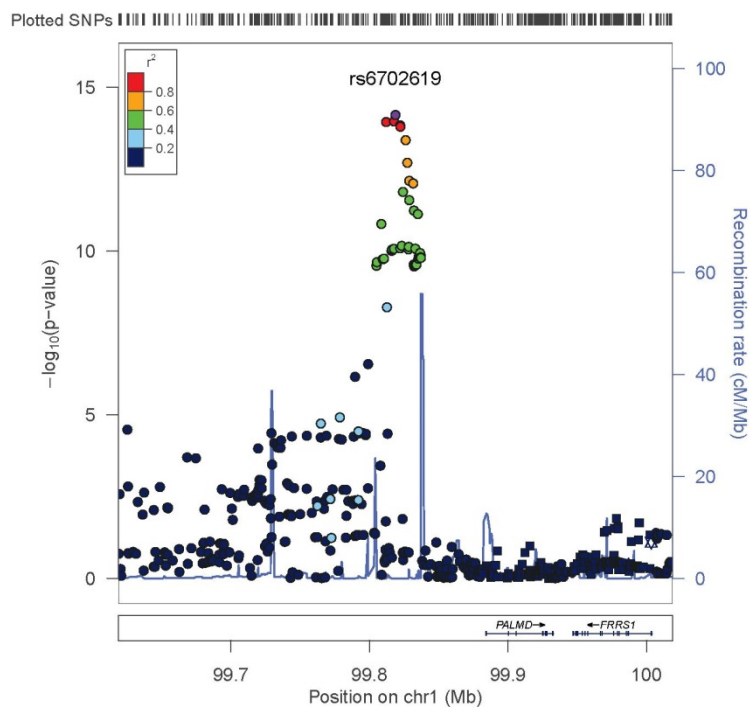

Supplemental Material: New Genetic variants for Cardiac Structure and Function – EchoGen

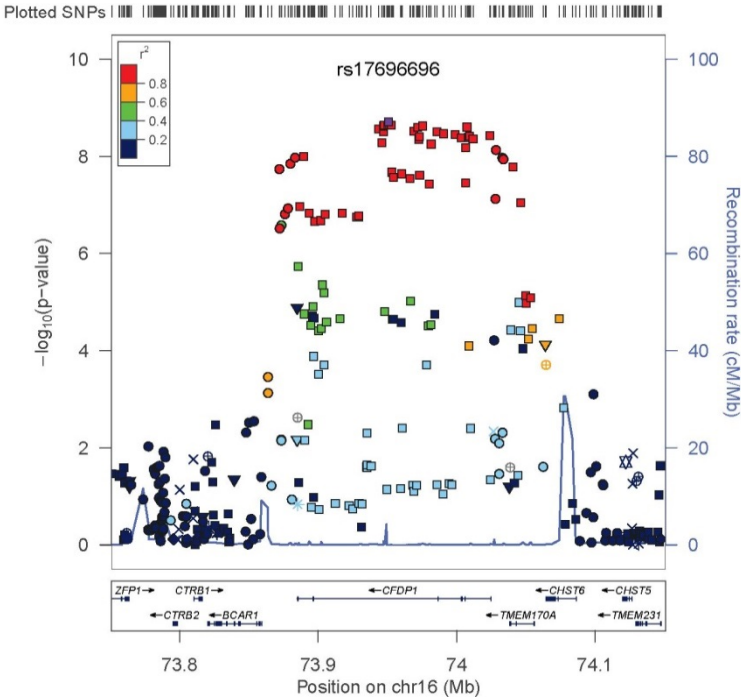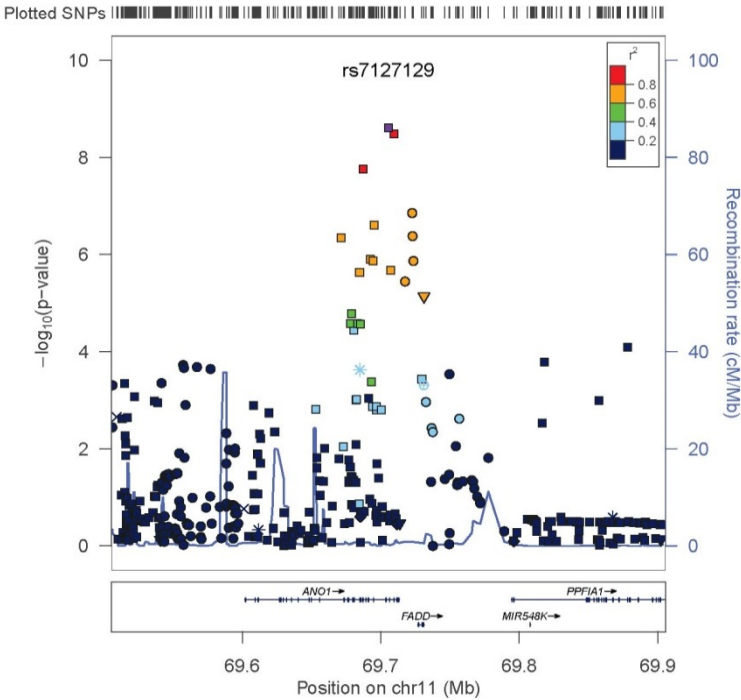

Supplemental Material: New Genetic variants for Cardiac Structure and Function – EchoGen

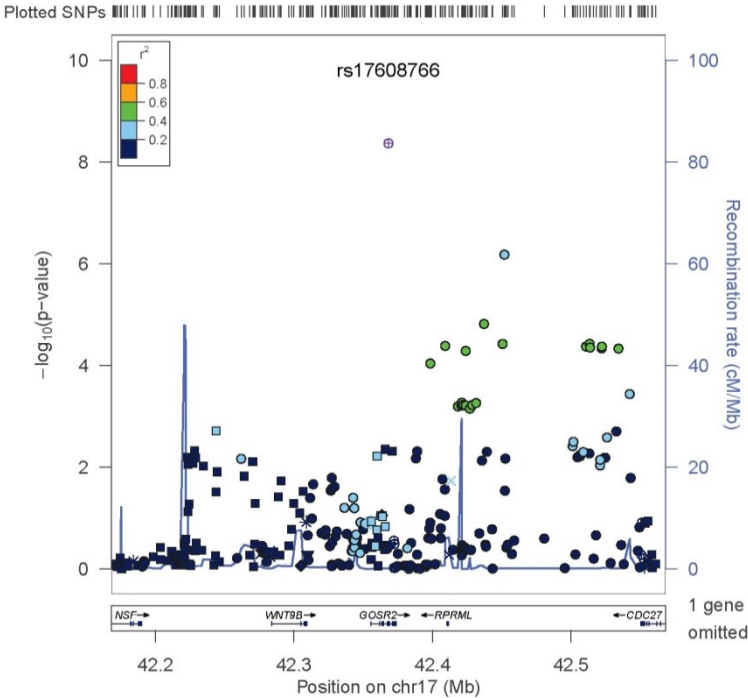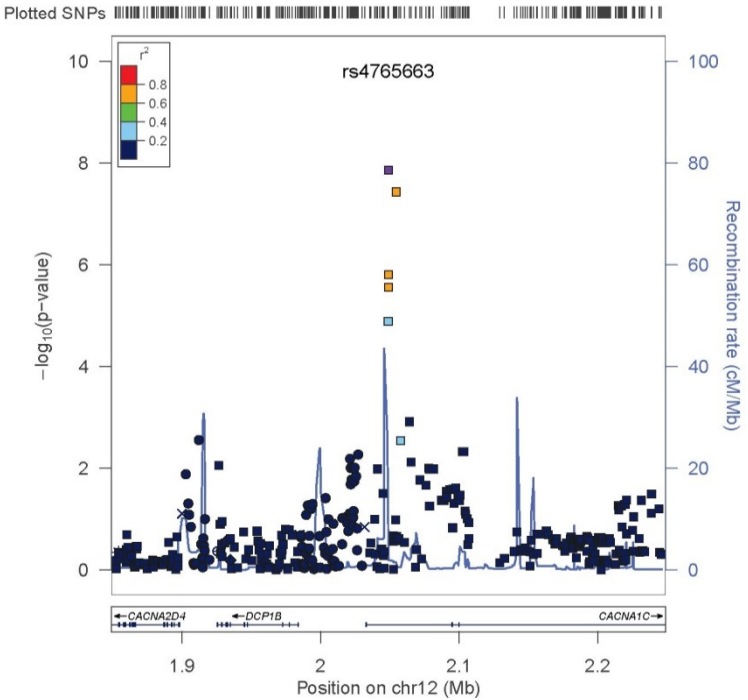

Supplemental Material: New Genetic variants for Cardiac Structure and Function – EchoGen

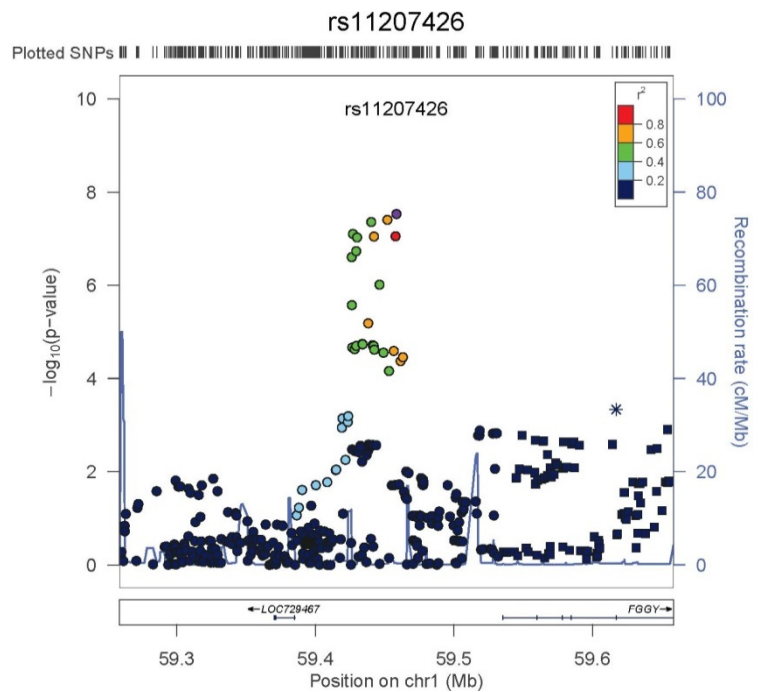

LVDD, n=30,201

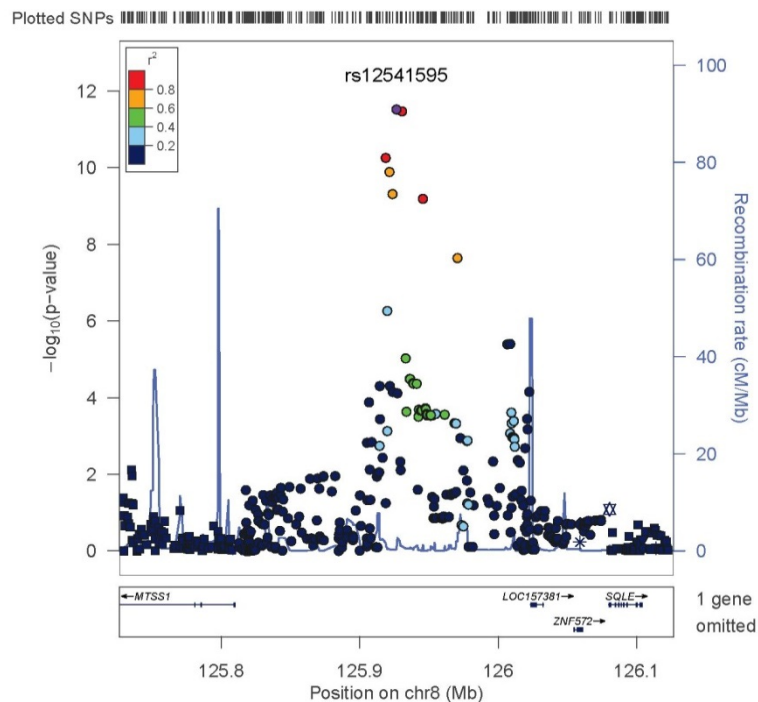

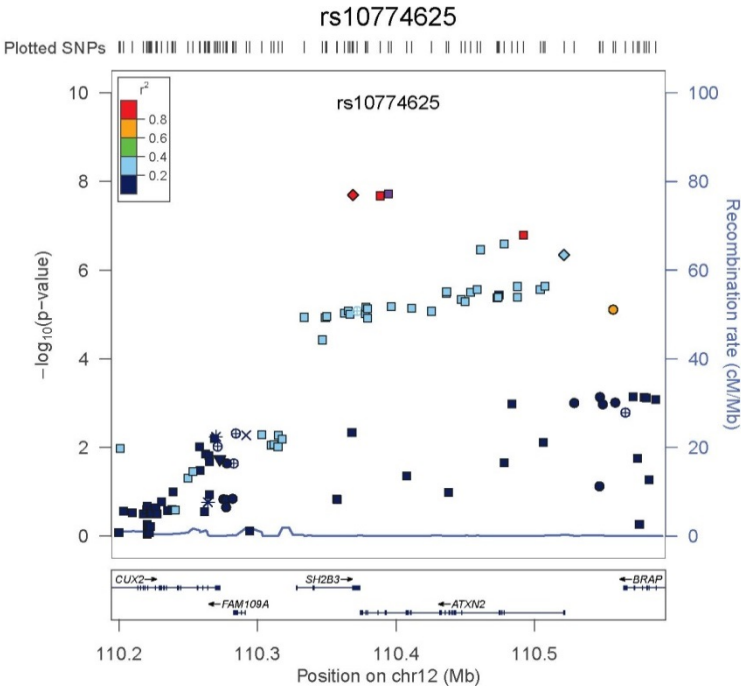

**Mv-A, n=21,643**

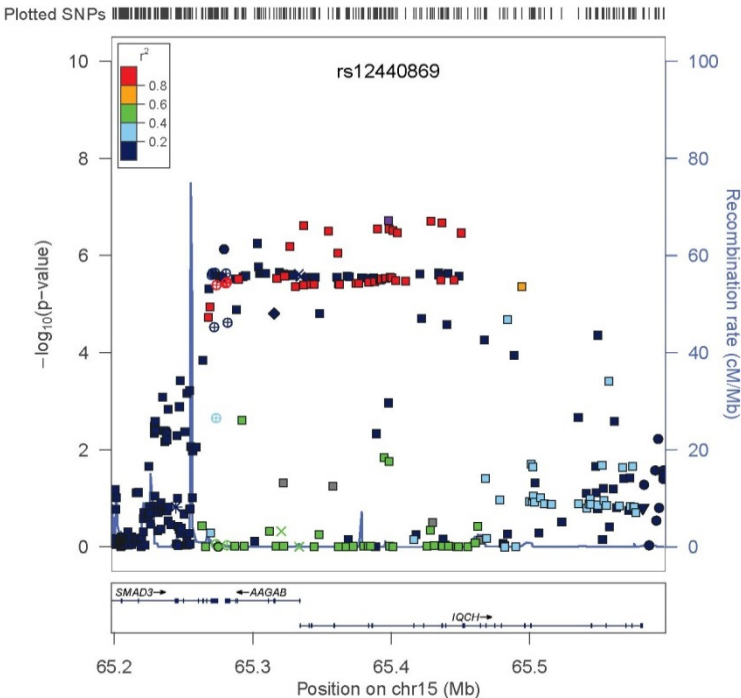

Figure S 19: Funnel plots for the novel genome-wide significant hits

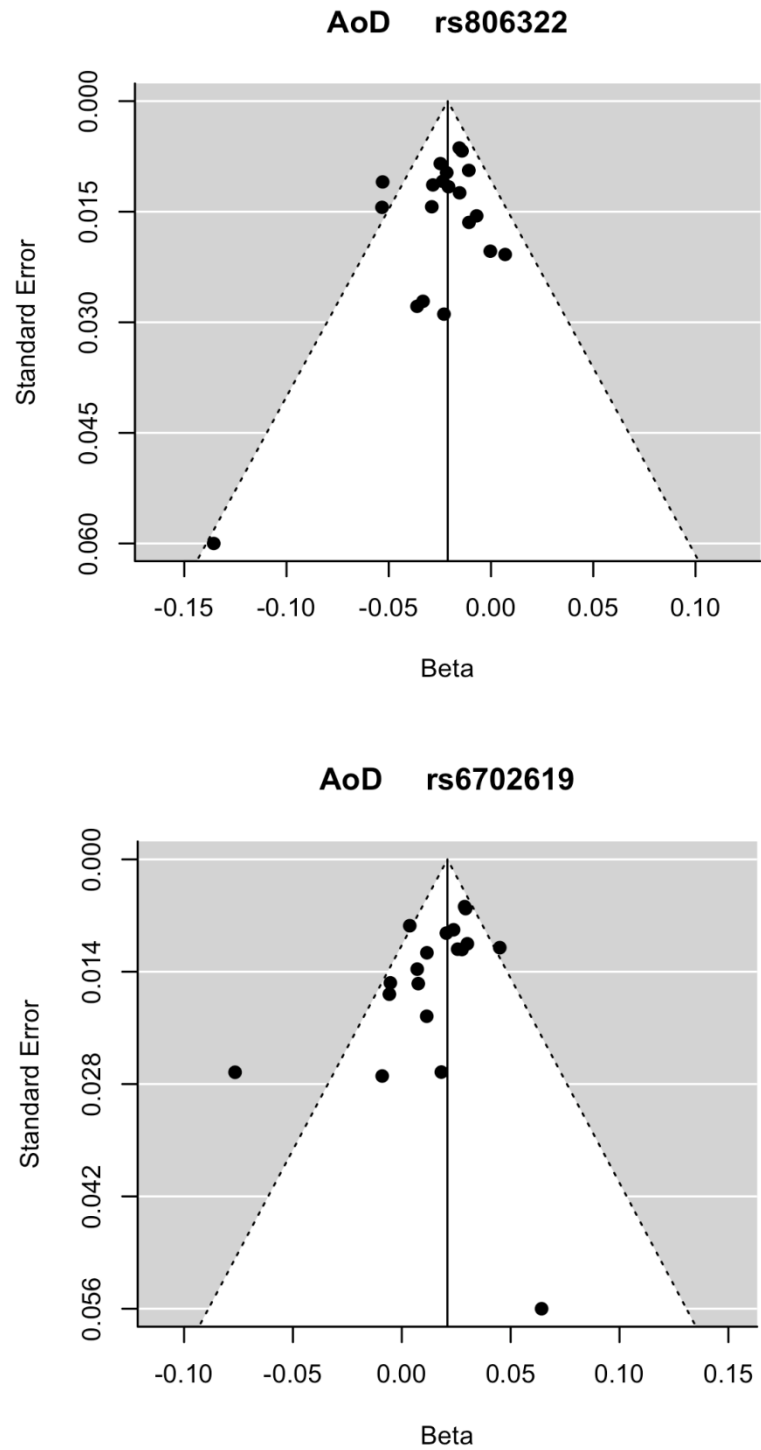

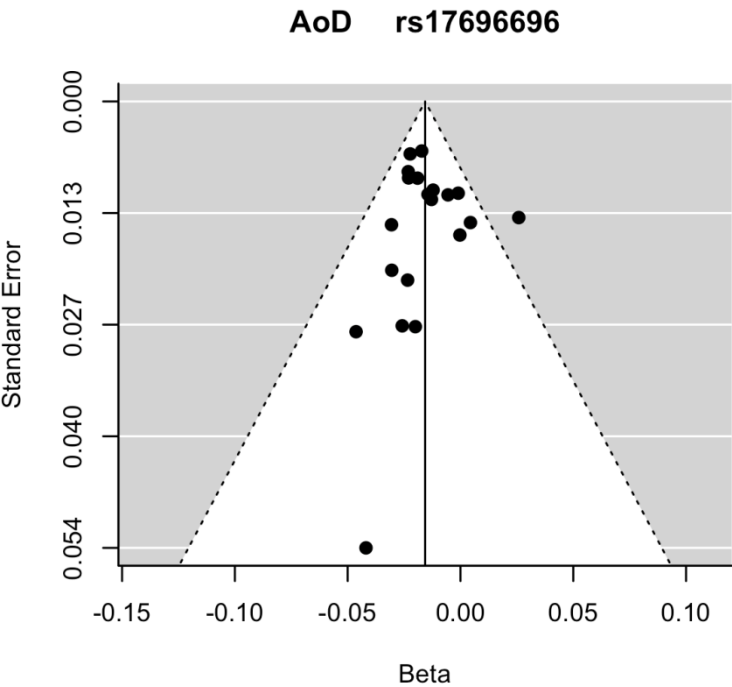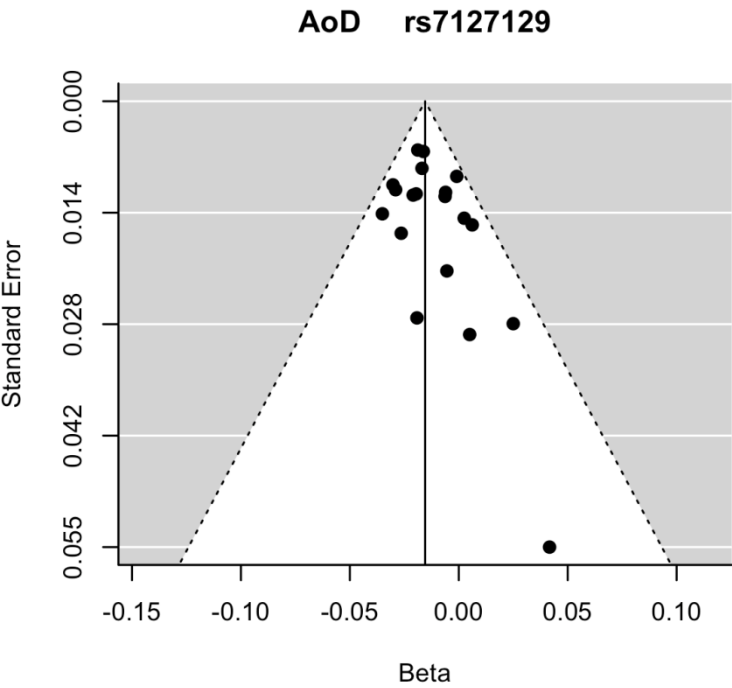

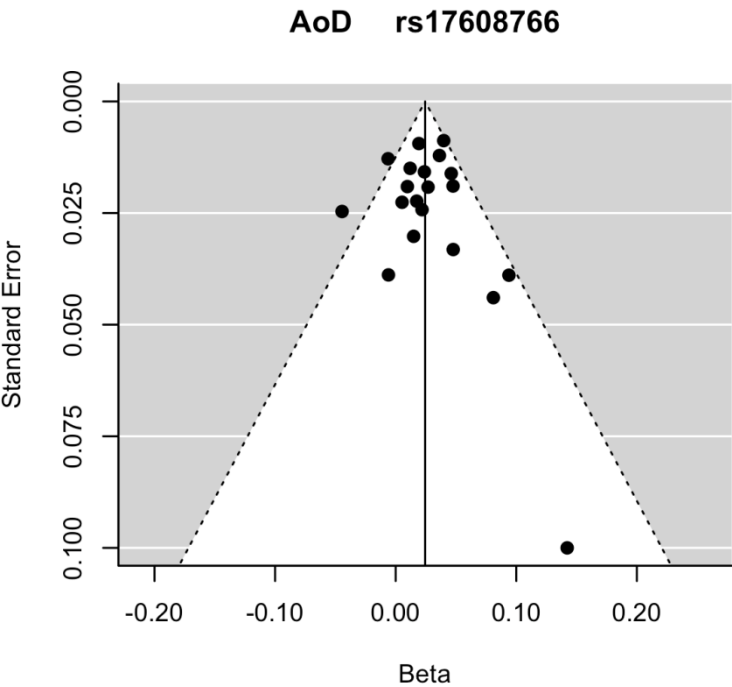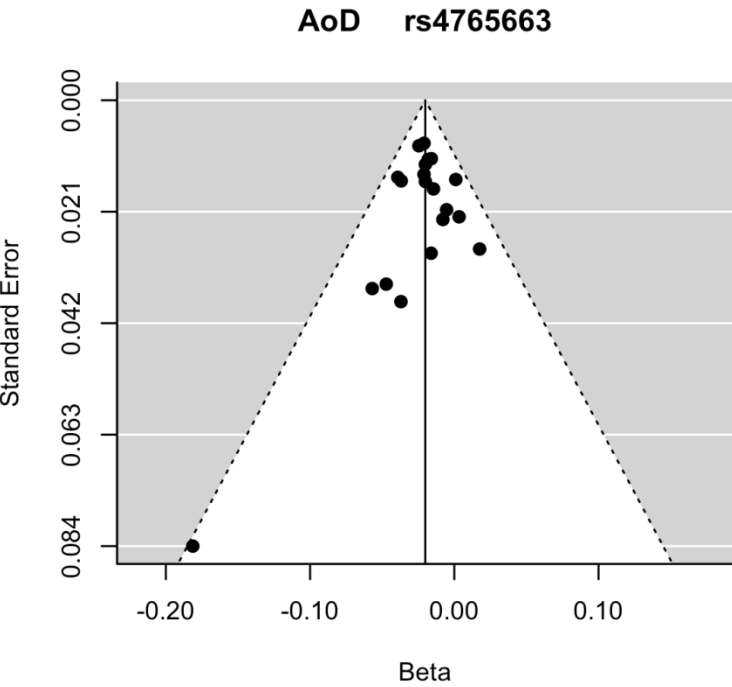

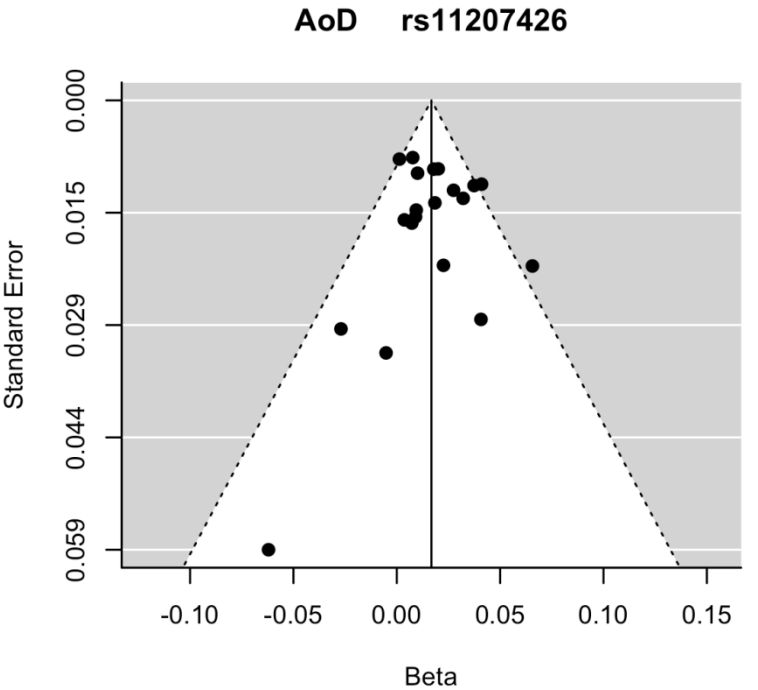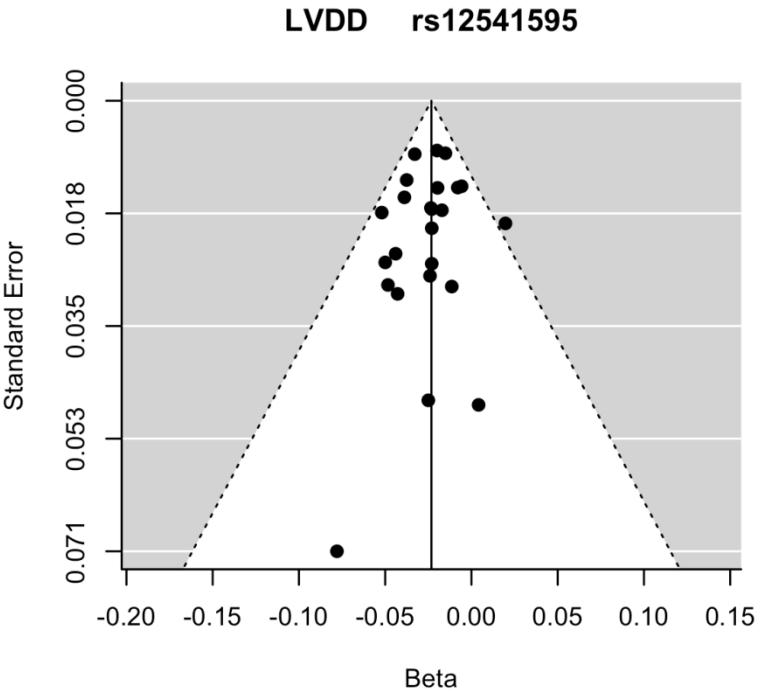

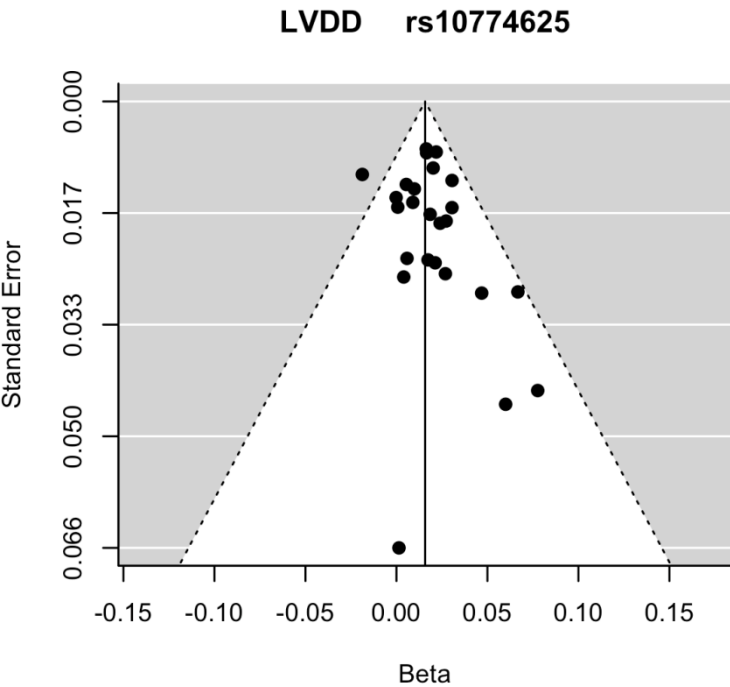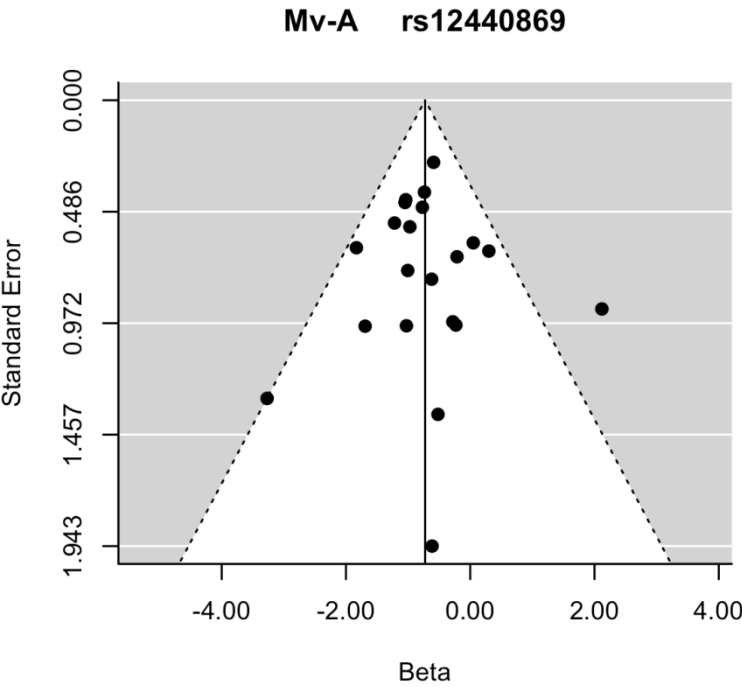

71

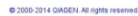

## **4 Acknowledgements**

### **General funding and acknowledgements**

This work was supported by a grant from the National Heart, Lung, and Blood Institute, USA (contract no: N01-HL-25195; R01HL 093328 to RSV), a MAIFOR grant from the University Medical Center Mainz, Germany (to PSW), the “Center for Translational Vascular Biology (CTVB)” of the Johannes Gutenberg-University of Mainz, and the Federal Ministry of Research and Education, Germany (contract no: BMBF 01EO1003 to PSW). This work was also supported by the research project Greifswald Approach to Individualized Medicine (GANI\_MED). GANI\_MED has been funded by the Federal Ministry of Education and Research and the Ministry of Cultural Affairs of the Federal State of Mecklenburg, West Pomerania (contract no: 03IS2061A).

We would like to thank all study participants, and the colleagues and coworkers from all cohorts and sites who were involved in the generation of data or in the analysis. We especially thank Andrew Johnson (Framingham Heart Study) for generation of the gene annotation database used for analysis. We thank the German Center for Cardiovascular Research (DZHK e.V.) for supporting the analysis and publication of this project. RSV is a member of the Scientific Advisory Board of the DZHK. Data on coronary artery disease and myocardial infarction have been contributed by CARDIoGRAMplusC4D investigators and have been downloaded from [www.CARDIOGRAMPLUSC4D.ORG](http://www.CARDIOGRAMPLUSC4D.ORG)

### **Study-specific acknowledgements, funding and ethics statements**

#### **AortaGen Consortium**

For full acknowledgements and funding information, please refer to Mitchell et al. (45).

### **Age, Gene/Environment Susceptibility (AGES) Study**

The Age, Gene/Environment Susceptibility Study has been funded by NIH contract N01-AG-1-2100, the NIA Intramural Research Program, Hjartavernd (the Icelandic Heart Association), and the Althingi (the Icelandic Parliament). The study is approved by the Icelandic National Bioethics Committee, VSN: 00-063. The researchers are indebted to the participants for their willingness to participate in the study. The AGES Reykjavik Study GWAS was approved by the National Bioethics Committee (VSN: 00-063) and the Data Protection Authority. Informed consent was obtained from all participants.

### **Anglo-Scandinavian Cardiac Outcomes Trial - Hypertension Association**

#### **Cardiovascular Disease (ASCOT) Study**

The Anglo-Scandinavian Cardiac Outcomes Trial and the establishment of the associated genetic repository were funded by Pfizer, New York, USA with some additional funding provided by Servier Research Group, Paris, France, and Leo Laboratories, Copenhagen, Denmark. Genotyping was funded by Barts, the London School of Medicine and Dentistry, and by the Centre Nationale de Genotypage Paris. The research was also in part funded by an Irish Research Council GREP award. We thank the other investigators, the staff, and the participants of the ASCOT study for their important contributions. The study conformed to good clinical practice guidelines and was approved by the respective local hospital ethics committees (St. Mary's Hospital, London, UK and Beaumont Hospital, Dublin, Ireland). Written informed consent for the study was obtained from all participants.

### **Austrian Stroke Prevention Study (ASPS)**

Current analyses of ASPS are funded by the Austrian Science Fund Project P20545\_P05 Genetics of cerebral small vessel disease (to H Schmidt). We are indebted to Birgit Reinhart for her continuous administrative support in the setting of the Austrian Stroke Prevention Study and to Johann Semmler for his high-quality technical assistance. The authors thank the staff and the participants of the ASPS for their valuable contributions. The study protocol was approved and accepted by the ethics committee of the Medical University of Graz, Austria, and informed consent was obtained from all study participants.

### **Coronary Artery Risk Development in Young Adults (CARDIA) Study**

The CARDIA Study is conducted and supported by the National Heart, Lung, and Blood Institute in collaboration with the University of Alabama at Birmingham (HHSN268201300025C & HHSN268201300026C), Northwestern University (HHSN268201300027C), University of Minnesota (HHSN268201300028C), Kaiser Foundation Research Institute (HHSN268201300029C), and Johns Hopkins University School of Medicine (HHSN268200900041C). CARDIA is also partially supported by the Intramural Research Program of the National Institute on Aging. Genotyping and imputation were funded as part of the Gene Environment Association Studies (GENEVA) through grants U01-HG004729, U01-HG04424, and U01-HG004446 from the National Human Genome Research Institute. This manuscript has been reviewed and approved by CARDIA for scientific content. SJ Shah is supported by R01 HL1075755. Informed consent was obtained from all participants, and the institutional review board at each participating CARDIA center approved the study.

### **Cardiovascular Disease, Living and Ageing in Halle (CARLA) Study**

This study was funded by a grant from the Deutsche Forschungsgemeinschaft (DFG, German Research Foundation) as part of the Collaborative Research Center 598 “Heart failure in the elderly—cellular mechanisms and therapy” at the Medical Faculty of the Martin-Luther-University Halle-Wittenberg; by a grant of the Wilhelm-Roux Programme of the Martin-Luther-University Halle-Wittenberg; by the Federal Employment Office; and by the Ministry of Education and Cultural Affairs of Saxony-Anhalt. The study was in accordance with the declaration of Helsinki. All participants gave their written informed consent. The study was approved by the local ethic commission of the Medical Faculty of the Martin-Luther-University Halle-Wittenberg.

**Cohorts for Heart and Aging Research in Genomic Epidemiology– Heart Failure Working Group (CHARGE-HF)**

For a full list of CHARGE-HF working group members contributing to this work and for CHARGE-HF acknowledgements, please reference (3).

**Cardiovascular Health Study (CHS)**

Cardiovascular Health Study: This CHS research was supported by NHLBI contracts HHSN268201200036C, HHSN268200800007C, N01HC55222, N01HC85079, N01HC85080, N01HC85081, N01HC85082, N01HC85083, N01HC85086, N01HC85084, N01HC35129; and NHLBI grants U01HL080295, R01HL087652, R01HL105756, R01HL103612, and R01HL120393 with additional contribution from the National Institute of Neurological Disorders and Stroke (NINDS). Additional support was provided through R01AG023629 from the National Institute on Aging (NIA). A full list of principal CHS investigators and institutions can be found at CHS-NHLBI.org. The provision of genotyping data was supported in part by the National Center for Advancing

Translational Sciences, CTSI grant UL1TR000124, and the National Institute of Diabetes and Digestive and Kidney Disease Diabetes Research Center (DRC) grant DK063491 to the Southern California Diabetes Endocrinology Research Center. The content is solely the responsibility of the authors and does not necessarily represent the official views of the National Institutes of Health. CHS was approved by institutional review committees at each site, the subjects gave informed consent, and those included in the present analysis consented to the use of their genetic information for the study of cardiovascular disease.

#### **Genetic Park of Cilento and Vallo di Diano Project (Cilento)**

This work was supported by grants from the Italian Ministry of Universities and CNR (Interomics Flagship Project, PON03PE\_00060\_7), the Assessorato Ricerca Regione Campania, the Fondazione con il SUD (2011-PDR-13), and the Istituto Banco di Napoli - Fondazione to MC. We thank the populations of Cilento for their participation in the study.

We thank Dr. Gianluigi Iovino for echocardiographic examinations. The study design was approved by the ethics committee of Azienda Sanitaria Locale Napoli 1. The study was conducted according to the criteria set by the declaration of Helsinki and each subject signed an informed consent before participating to the study.

#### **DEPICT**

TH Pers is supported by The Danish Council for Independent Research Medical Sciences (FSS) and The Alfred Benzon Foundation.

#### **Framingham Heart Study, original cohort, offspring and third generation (FHS1, FHS2, FHS3)**

This work was partially supported by the National Heart, Lung and Blood Institute's Framingham Heart Study (Contracts No. N01-HC-25195 and HHSN268201500001I), research grants (5R01HL107385-04 1R01HL126136-01A1), and a contract with Affymetrix, Inc for genotyping services (Contract No. N02-HL-6-4278). A portion of this research utilized the Linux Cluster for Genetic Analysis (LinGA-II) funded by the Robert Dawson Evans Endowment of the Department of Medicine at Boston University School of Medicine and Boston Medical Center. This research was conducted in part using data and resources from the Framingham Heart Study of the National Heart Lung and Blood Institute of the National Institutes of Health and Boston University School of Medicine. The analyses reflect intellectual input and resource development from the Framingham Heart Study investigators participating in the SNP Health Association Resource (SHARe) project. Each study participant provided written informed consent for participation in the study and for genetic analyses and the study was approved by the Boston University Medical Center Institutional Review Board.

### **The Generation R Study (Generation R)**

The general design of Generation R Study is made possible by financial support from the Erasmus Medical Center, Rotterdam, the Erasmus University Rotterdam, the Netherlands Organization for Health Research and Development (ZonMw), the Netherlands Organisation for Scientific Research (NWO), the Ministry of Health, Welfare and Sport and the Ministry of Youth and Families. VW Jaddoe received an additional grant from the Netherlands Organization for Health Research and Development (VIDI 016.136.361) and a European Research Council Consolidator Grant (ERC-2014-CoG-648916). The Generation R Study is conducted by the Erasmus Medical Center in close

collaboration with the School of Law and Faculty of Social Sciences of the Erasmus University Rotterdam, the Municipal Health Service Rotterdam area, Rotterdam, the Rotterdam Homecare Foundation, Rotterdam and the Stichting Trombosedienst & Artsenlaboratorium Rijnmond (STAR-MDC), Rotterdam. We gratefully acknowledge the contribution of children and parents, general practitioners, hospitals, midwives and pharmacies in Rotterdam. The generation and management of GWAS genotype data for the Generation R Study were done at the Genetic Laboratory of the Department of Internal Medicine, Erasmus MC, the Netherlands. We would like to thank Karol Estrada, Dr. Tobias A. Knoch, Anis Abuseiris, Luc V. de Zeeuw, and Rob de Graaf, for their help in creating GRIMP, BigGRID, MediGRID, and Services@MediGRID/D-Grid, (funded by the German Bundesministerium fuer Forschung und Technology; grants 01 AK 803 A-H, 01 IG 07015 G) for access to their grid computing resources. We thank Mila Jhamai, Manoushka Ganesh, Pascal Arp, Marijn Verkerk, Lizbeth Herrera and Marjolein Peters for their help in creating, managing and QC of the GWAS database. Also, we thank Karol Estrada for his support in creation and analysis of imputed data. The Generation R Study is made possible by financial support from the Erasmus Medical Center, Rotterdam, the Erasmus University Rotterdam and the Netherlands Organization for Health Research and Development. The study protocol was approved by the Medical Ethics Committee of the Erasmus Medical Center, Rotterdam. Written informed consent was obtained for all participants.

### **Gutenberg Health Study (GHS-I, -II, -III)**

The Gutenberg Health Study is funded through the government of Rhineland-Palatinate („Stiftung Rheinland-Pfalz für Innovation“, contract AZ 961-386261/733), the research

programs “Wissen schafft Zukunft” and “Center for Translational Vascular Biology (CTVB)” of the Johannes Gutenberg-University of Mainz, and its contract with Boehringer Ingelheim and PHILIPS Medical Systems, including an unrestricted grant for the Gutenberg Health Study. PS Wild is funded by the Federal Ministry of Education and Research (BMBF 01EO1003) and he received honoraria for lectures or consulting from Boehringer Ingelheim and Bayer HealthCare, Leverkusen. We thank all study participants for their willingness to provide data for this research project and we are indebted to all coworkers for their enthusiastic commitment. The study followed the recommendations of the Declaration of Helsinki and was approved by the ethics committee of the Chamber of Physicians of Rhineland-Palatinate, Germany (reference no. 837.020.07). Written informed consent was obtained from all participants.

### **Hypertension Genetic Epidemiology Network (HyperGEN)**

The HyperGEN Echocardiography ancillary study was funded by the National Institutes of Health (R01 HL 55673). The HyperGEN parent study was funded by cooperative agreements (U10) with the National Heart, Lung, and Blood Institute: HL54471, HL54472, HL54473, HL54495, HL54496, HL54497, HL54509, HL54515. The authors thank the HyperGEN participants and staff for their valuable contributions. HyperGEN was approved by the institutional review committees at each site. All participants gave informed consent, and those included in the present analysis consented to the use of their genetic information for cardiovascular disease or related conditions.

### **Jackson Heart Study (JHS)**

The Jackson Heart Study is supported by contracts HSN268201300046C, HHSN268201300047C, HHSN268201300048C, HHSN268201300049C,

HHSN268201300050C from the National Heart, Lung, and Blood Institute on Minority Health and Health Disparities. The authors thank the Jackson Heart Study team (University of Mississippi Medical Center, Jackson State University and Tougaloo College) and participants for their long-term commitment that continues to improve our understanding of the genetic epidemiology of cardiovascular and other chronic diseases. The study protocol was approved by the University of Mississippi Medical Center Internal Review Board committee on human subjects. All participants gave informed consent.

#### **Kompetenznetz Herzinsuffizienz (KNHI)**

EB, BP, HB and GH received funding by the national genome research network NGFN of the BMBF (grant numbers 01GS0837 and 01GS0422, funding MS and DMalzahn); FE and BP received funding by the competence network heart failure Germany. The study was approved by the ethics committee of the Georg-August-University in Göttingen, Germany and all participants gave informed consent.

#### **Cooperative Health Research in the Region of Augsburg, followup studies F3 and F4 (KORA-F3 and –F4)**

The Cooperative Health Research in the Region of Augsburg studies were financed by the Helmholtz Zentrum München, German Research Center for Environmental Health, Neuherberg, Germany and supported by grants from the German Federal Ministry of Education and Research (BMBF). Part of this work was financed by the German National Genome Research Network (NGFN). Our research was supported within the Munich Center of Health Sciences (MC Health) as part of LMUinnovativ. The studies

were approved by the local ethics committees and all participants gave informed consent.

### **Ludwigshafen Risk and Cardiovascular Health (LURIC) Study**

This work was supported by the 7th Framework Program (AtheroRemo, grant agreement number 201668 and RiskyCAD, grant agreement number 305739) of the EU and by the INTERREG-IV-Oberrhein-Program (Project A28, Genetic mechanisms of cardiovascular diseases) with support from the European Regional Development Fund (ERDF) and the Wissenschaftsoffensive TMO. We extend our appreciation to the participants of the LURIC study and thank the LURIC study team who were either temporarily or permanently involved in patient recruitment as well as sample and data handling, in addition to the laboratory staff at the Ludwigshafen General Hospital and the Universities of Freiburg and Ulm, Germany. The study was approved by the ethics committee at the "Landesärztekammer Rheinland-Pfalz" and was conducted in accordance with the "Declaration of Helsinki". Informed written consent was obtained from all participants.

### **Myocardial Applied Genomics Network (MAGNet)**

MAGNet (<http://www.med.upenn.edu/magnet/>) is funded by NIH R01HL105993.

MAGNet protocols have been approved by institutional review boards at University of Pennsylvania, Stanford University, and Cleveland Clinic, Gift of Life.

### **Microisolates in South Tyrol (MICROS) Study**

The MICROS study was supported by the Ministry of Health and Department of Educational Assistance, University and Research of the Autonomous Province of Bolzano, the South Tyrolean Sparkasse Foundation, and the European Union

framework program 6 EUROSPAN project (contract no. LSHG-CT-2006-018947). For the MICROS study, we thank the primary care practitioners Raffaella Stocker, Stefan Waldner, Toni Pizzecco, Josef Plangger and Ugo Marcadent, and Helmuth Weiss and the personnel of the Hospital of Silandro (Department of Laboratory Medicine) for their participation and collaboration in the research project. The MICROS study was approved by the ethical committee of the Autonomous Province of Bolzano. Informed consent was obtained from all participants.

### **Malmö Preventive Project (MPP)**

This work in the MPP was supported by grants from the the Swedish Heart-Lung Foundation (JGS, OM, PN), the Swedish Research Council (to JGS and OM), the European Research Council (OM), the Faculty of Medicine of Lund University (OM), Skåne University Hospital (JGS, OM) and the Crafoord Foundation (JGS, OM). This study was approved by the Ethics Committee of Lund University. All participants provided written informed consent before entering the study.

### **Northern Manhattan Study (NOMAS)**

NOMAS is supported by the National Institute of Neurological Disorders and Stroke (NINDS) of the National Institutes of Health (NIH) through grants R37 NS2993 (Dr. Sacco and Elkind) and R01 NS36286 (Dr. Di Tullio). MDT is supported by grant NINDS R01 NS083784. RLS and NDD are supported by McKnight Brain Foundation. The authors gratefully acknowledge Ashley Beecham and Shengru Guo for their analytical support. The authors also gratefully acknowledge the McKnight Institute for providing funding to genotype NOMAS participants. All patients provided informed consent to

participate in the study. The study was approved by the Institutional Review Boards of Columbia University and the University of Miami.

### **Prospective Investigation of the Vasculature in Uppsala Seniors (PIVUS) Study**

This study was supported by grants from the Swedish Foundation for Strategic Research (project grant no. ICA08-0047), the Swedish Research Council (project grant no. 2012-1397), the Swedish Heart-Lung Foundation (project grant no. 20120197), the Swedish Society of Medicine, and Uppsala University. Genotyping was performed by the SNP&SEQ Technology Platform in Uppsala ([www.genotyping.se](http://www.genotyping.se)), which is supported by Uppsala University, Uppsala University Hospital, Science for Life Laboratory - Uppsala and the Swedish Research Council (Contracts 80576801 and 70374401). Genotyping was performed by the SNP&SEQ Technology Platform in Uppsala ([www.genotyping.se](http://www.genotyping.se)). We thank Tomas Axelsson, Ann-Christine Wiman and Caisa Pöntinen for their excellent assistance with genotyping. APM is a Wellcome Trust Senior Research Fellow in Basic Biomedical Science (grant number WT098017). The study was approved by the Ethics Committee of Uppsala University and all participants provided informed consent.

### **Rotterdam Study (RS)-I, -II, -III**

The generation and management of GWAS genotype data for the Rotterdam Study is supported by the Netherlands Organisation of Scientific Research NWO Investments (nr. 175.010.2005.011, 911-03-012). This study is funded by the Research Institute for Diseases in the Elderly (014-93-015; RIDE2), the Netherlands Genomics Initiative (NGI)/Netherlands Organisation for Scientific Research (NWO) project nr. 050-060-810. The Rotterdam Study is funded by Erasmus Medical Center and Erasmus University,

Rotterdam, Netherlands Organization for the Health Research and Development (ZonMw), the Research Institute for Diseases in the Elderly (RIDE), the Ministry of Education, Culture and Science, the Ministry for Health, Welfare and Sports, the European Commission (DG XII), and the Municipality of Rotterdam. OH Franco works in ErasmusAGE, a center for aging research across the life course funded by Nestlé Nutrition (Nestec Ltd.), Metagenics Inc. and AXA. Nestlé Nutrition (Nestec Ltd.), Metagenics Inc. and AXA had no role in design and conduct of the study; collection, management, analysis, and interpretation of the data; and preparation, review or approval of the manuscript. The generation and management of GWAS genotype data for the Rotterdam Study is supported by the Netherlands Organisation of Scientific Research NWO Investments (nr. 175.010.2005.011, 911-03-012). This study is funded by the Research Institute for Diseases in the Elderly (014-93-015; RIDE2), the Netherlands Genomics Initiative (NGI)/Netherlands Organisation for Scientific Research (NWO) project nr. 050-060-810. We thank Pascal Arp, Mila Jhamai, Marijn Verkerk, Lizbeth Herrera and Marjolein Peters for their help in creating the GWAS database, and Karol Estrada and Maksim V. Struchalin for their support in creation and analysis of imputed data. The Rotterdam Study is funded by Erasmus Medical Center and Erasmus University, Rotterdam, Netherlands Organization for the Health Research and Development (ZonMw), the Research Institute for Diseases in the Elderly (RIDE), the Ministry of Education, Culture and Science, the Ministry for Health, Welfare and Sports, the European Commission (DG XII), and the Municipality of Rotterdam. The authors are grateful to the study participants, the staff of the Rotterdam Study and the participating general practitioners and pharmacists. The Rotterdam Study has been approved by the

Medical Ethics Committee of the Erasmus MC and by the Dutch Ministry of Health, Welfare and Sport, implementing the “Wet Bevolkings Onderzoek: ERGO (Population Screening Act: Rotterdam Study). All participants provided written informed consent to participate in the study and to obtain information from their treating physicians.

### **Study of Health in Pomerania (SHIP and SHIP-Trend)**

SHIP is part of the Community Medicine Research net of the University of Greifswald, Germany, which is funded by the Federal Ministry of Education and Research (grants no. 01ZZ9603, 01ZZ0103, and 01ZZ0403), the Ministry of Cultural Affairs as well as the Social Ministry of the Federal State of Mecklenburg-West Pomerania. Echocardiography in the 5-year follow-up (SHIP-1) was funded by the Competence Network Heart Failure of the Federal Ministry of Education and Research. Genome-wide data have been supported by the Federal Ministry of Education and Research (grant no. 03ZIK012) and a joint grant from Siemens Healthcare, Erlangen, Germany and the Federal State of Mecklenburg- West Pomerania. The University of Greifswald is a member of the Caché Campus program of the InterSystems GmbH. All participants gave informed written consent. The study followed the recommendations of the Declaration of Helsinki and was approved by the Ethics Committee of the University of Greifswald.

### **Uppsala Longitudinal Study of Adult Men (ULSAM)**

This study was supported by grants from the Swedish Foundation for Strategic Research (project grant no. ICA08-0047), the Swedish Research Council (project grant no. 2012-1397), the Swedish Heart-Lung Foundation (project grant no. 20120197), the Swedish Society of Medicine, and Uppsala University. Genotyping was performed by the SNP&SEQ Technology Platform in Uppsala ([www.genotyping.se](http://www.genotyping.se)), which is

supported by Uppsala University, Uppsala University Hospital, Science for Life Laboratory - Uppsala and the Swedish Research Council (Contracts 80576801 and 70374401). Genotyping was performed by the SNP&SEQ Technology Platform in Uppsala ([www.genotyping.se](http://www.genotyping.se)). APM is a Senior Fellow in Basic Biomedical Science under award WT098017. We thank Tomas Axelsson, Ann-Christine Wiman and Caisa Pöntinen for their excellent assistance with genotyping. The study was approved by the Ethics Committee of Uppsala University and all participants provided informed consent.

### **The Cardiovascular Risk in Young Finns Study (YFS)**

The Young Finns Study has been financially supported by the Academy of Finland: grants 286284, 134309 (Eye), 126925, 121584, 124282, 129378 (Salve), 117787 (Gendi), and 41071 (Skidi); the Social Insurance Institution of Finland; Competitive State Research Financing of the Expert Responsibility area of Kuopio, Tampere and Turku University Hospitals (grant X51001); Juho Vainio Foundation; Paavo Nurmi Foundation; Finnish Foundation for Cardiovascular Research ; Finnish Cultural Foundation; Tampere Tuberculosis Foundation; Emil Aaltonen Foundation; Yrjö Jahnsson Foundation; Signe and Ane Gyllenberg Foundation; and Diabetes Research Foundation of Finnish Diabetes Association. The expert technical assistance in the statistical analyses by Irina Lisinen is gratefully acknowledged. The study was approved by the local ethics committees (University Hospitals of Helsinki, Turku, Tampere, Kuopio and Oulu) and was conducted following the guidelines of the Declaration of Helsinki. All participants gave their written informed consent.

### **Role of the sponsors**

The sponsors had no role in the study design, analyses, drafting of the manuscript, or the decision to publish.

Drs. Wild, Felix, Schillert, Teumer, Zeller, Vasan and Dörr had full access to all of the data in the study and take responsibility for the integrity of the data and the accuracy of the data analysis.

## 5 References

1. Vasan, R.S. *et al.* Genetic variants associated with cardiac structure and function: a meta-analysis and replication of genome-wide association data. *JAMA* **302**, 168-78 (2009).
2. Anand, I.S., Florea, V.G., Solomon, S.D., Konstam, M.A. & Udelson, J.E. Noninvasive assessment of left ventricular remodeling: concepts, techniques, and implications for clinical trials. *J Card Fail* **8**, S452-64 (2002).
3. Gardin, J.M. How reliable are serial echocardiographic measurements in detecting regression in left ventricular hypertrophy and changes in function? *J Am Coll Cardiol* **34**, 1633-6 (1999).
4. Devereux, R.B. *et al.* An appraisal of echocardiography as an epidemiological tool. The Strong Heart Study. *Ann Epidemiol* **13**, 238-44 (2003).
5. Gosse, P. *et al.* Centralized echocardiogram quality control in a multicenter study of regression of left ventricular hypertrophy in hypertension. *J Hypertens* **16**, 531-5 (1998).
6. Palmieri, V. *et al.* Reliability of echocardiographic assessment of left ventricular structure and function: the PRESERVE study. Prospective Randomized Study Evaluating Regression of Ventricular Enlargement. *J Am Coll Cardiol* **34**, 1625-32 (1999).
7. Lang, R.M. *et al.* Recommendations for chamber quantification. *Eur J Echocardiogr* **7**, 79-108 (2006).
8. Devereux, R.B. *et al.* Echocardiographic assessment of left ventricular hypertrophy: comparison to necropsy findings. *Am J Cardiol* **57**, 450-8 (1986).
9. Vasan, R.S. *et al.* Plasma natriuretic peptides for community screening for left ventricular hypertrophy and systolic dysfunction: the Framingham heart study. *JAMA* **288**, 1252-9 (2002).
10. Redfield, M.M. *et al.* Burden of systolic and diastolic ventricular dysfunction in the community: appreciating the scope of the heart failure epidemic. *JAMA* **289**, 194-202 (2003).
11. Yang, J., Lee, S.H., Goddard, M.E. & Visscher, P.M. GCTA: a tool for genome-wide complex trait analysis. *Am J Hum Genet* **88**, 76-82 (2011).

12. Jaddoe, V.W. *et al.* The Generation R Study: design and cohort update 2012. *Eur J Epidemiol* **27**, 739-56 (2012).
13. Nikpay, M. *et al.* A comprehensive 1,000 Genomes-based genome-wide association meta-analysis of coronary artery disease. *Nat Genet* **47**, 1121-30 (2015).
14. Howie, B., Fuchsberger, C., Stephens, M., Marchini, J. & Abecasis, G.R. Fast and accurate genotype imputation in genome-wide association studies through pre-phasing. *Nat Genet* **44**, 955-9 (2012).
15. Irizarry, R.A. *et al.* Exploration, normalization, and summaries of high density oligonucleotide array probe level data. *Biostatistics* **4**, 249-64 (2003).
16. Johnson, W.E., Li, C. & Rabinovic, A. Adjusting batch effects in microarray expression data using empirical Bayes methods. *Biostatistics* **8**, 118-27 (2007).
17. Westra, H.J. *et al.* Systematic identification of trans eQTLs as putative drivers of known disease associations. *Nat Genet* **45**, 1238-43 (2013).
18. Zeller, T. *et al.* Genetics and beyond--the transcriptome of human monocytes and disease susceptibility. *PLoS One* **5**, e10693 (2010).
19. Segre, A.V. *et al.* Common inherited variation in mitochondrial genes is not enriched for associations with type 2 diabetes or related glycemic traits. *PLoS Genet* **6**(2010).
20. Benjamini, Y. & Hochberg, Y. Controlling the False Discovery Rate - a Practical and Powerful Approach to Multiple Testing. *Journal of the Royal Statistical Society Series B-Methodological* **57**, 289-300 (1995).
21. Rossin, E.J. *et al.* Proteins encoded in genomic regions associated with immune-mediated disease physically interact and suggest underlying biology. *PLoS Genet* **7**, e1001273 (2011).
22. Consortium, E.P. An integrated encyclopedia of DNA elements in the human genome. *Nature* **489**, 57-74 (2012).
23. Pers, T.H. *et al.* Biological interpretation of genome-wide association studies using predicted gene functions. *Nature Communications* **5**, 5890 (2014).
24. Fehrmann, R.S.N. *et al.* Gene expression analysis identifies global gene dosage sensitivity in cancer. *Nature Genetics* (2015).

25. Harris, T.B. *et al.* Age, Gene/Environment Susceptibility-Reykjavik Study: multidisciplinary applied phenomics. *Am J Epidemiol* **165**, 1076-87 (2007).
26. Dahlöf, B. *et al.* Prevention of cardiovascular events with an antihypertensive regimen of amlodipine adding perindopril as required versus atenolol adding bendroflumethiazide as required, in the Anglo-Scandinavian Cardiac Outcomes Trial-Blood Pressure Lowering Arm (ASCOT-BPLA): a multicentre randomised controlled trial. *Lancet* **366**, 895-906 (2005).
27. Schmidt, R. *et al.* Assessment of cerebrovascular risk profiles in healthy persons: definition of research goals and the Austrian Stroke Prevention Study (ASPS). *Neuroepidemiology* **13**, 308-13 (1994).
28. Friedman, G.D. *et al.* CARDIA: study design, recruitment, and some characteristics of the examined subjects. *J Clin Epidemiol* **41**, 1105-16 (1988).
29. Greiser, K.H. *et al.* Cardiovascular disease, risk factors and heart rate variability in the elderly general population: design and objectives of the CARdiovascular disease, Living and Ageing in Halle (CARLA) Study. *BMC Cardiovasc Disord* **5**, 33 (2005).
30. Fried, L.P. *et al.* The Cardiovascular Health Study: design and rationale. *Ann Epidemiol* **1**, 263-76 (1991).
31. Colonna, V. *et al.* Campora: a young genetic isolate in South Italy. *Hum Hered* **64**, 123-35 (2007).
32. Colonna, V. *et al.* Comparing population structure as inferred from genealogical versus genetic information. *Eur J Hum Genet* **17**, 1635-41 (2009).
33. Dawber, T.R., Meadors, G.F. & Moore, F.E., Jr. Epidemiological approaches to heart disease: the Framingham Study. *Am J Public Health Nations Health* **41**, 279-81 (1951).
34. Kannel, W.B., Feinleib, M., McNamara, P.M., Garrison, R.J. & Castelli, W.P. An investigation of coronary heart disease in families. The Framingham offspring study. *Am J Epidemiol* **110**, 281-90 (1979).
35. Splansky, G.L. *et al.* The Third Generation Cohort of the National Heart, Lung, and Blood Institute's Framingham Heart Study: design, recruitment, and initial examination. *Am J Epidemiol* **165**, 1328-35 (2007).

36. Wild, P.S. *et al.* [The Gutenberg Health Study]. *Bundesgesundheitsblatt Gesundheitsforschung Gesundheitsschutz* **55**, 824-9 (2012).
37. Williams, R.R. *et al.* NHLBI family blood pressure program: methodology and recruitment in the HyperGEN network. Hypertension genetic epidemiology network. *Ann Epidemiol* **10**, 389-400 (2000).
38. Taylor, H.A., Jr. *et al.* Toward resolution of cardiovascular health disparities in African Americans: design and methods of the Jackson Heart Study. *Ethn Dis* **15**, S6-4-17 (2005).
39. Pilz, S. *et al.* Associations of methylarginines and homoarginine with diastolic dysfunction and cardiovascular risk factors in patients with preserved left ventricular ejection fraction. *J Card Fail* **20**, 923-30 (2014).
40. Schunkert, H. *et al.* Cardiovascular phenotypes and functional parameters in the general population--results of the MONICA/KORA studies. *Gesundheitswesen* **67 Suppl 1**, S74-8 (2005).
41. Wichmann, H.E., Gieger, C., Illig, T. & Group, M.K.S. KORA-gen--resource for population genetics, controls and a broad spectrum of disease phenotypes. *Gesundheitswesen* **67 Suppl 1**, S26-30 (2005).
42. Holle, R., Happich, M., Lowel, H., Wichmann, H.E. & Group, M.K.S. KORA--a research platform for population based health research. *Gesundheitswesen* **67 Suppl 1**, S19-25 (2005).
43. Winkelmann, B.R. *et al.* Rationale and design of the LURIC study--a resource for functional genomics, pharmacogenomics and long-term prognosis of cardiovascular disease. *Pharmacogenomics* **2**, S1-73 (2001).
44. Pattaro, C. *et al.* The genetic study of three population microisolates in South Tyrol (MICROS): study design and epidemiological perspectives. *BMC Med Genet* **8**, 29 (2007).
45. Leosdottir, M. *et al.* Myocardial structure and function by echocardiography in relation to glucometabolic status in elderly subjects from 2 population-based cohorts: a cross-sectional study. *Am Heart J* **159**, 414-420 e4 (2010).
46. Sacco, R.L. *et al.* Design of a family study among high-risk Caribbean Hispanics: the Northern Manhattan Family Study. *Ethn Dis* **17**, 351-7 (2007).

47. Lind, L., Fors, N., Hall, J., Marttala, K. & Stenborg, A. A comparison of three different methods to evaluate endothelium-dependent vasodilation in the elderly: the Prospective Investigation of the Vasculature in Uppsala Seniors (PIVUS) study. *Arterioscler Thromb Vasc Biol* **25**, 2368-75 (2005).
48. Hofman, A. *et al.* The Rotterdam Study: objectives and design update. *Eur J Epidemiol* **22**, 819-29 (2007).
49. Völzke, H. *et al.* Cohort profile: the study of health in Pomerania. *Int J Epidemiol* **40**, 294-307 (2011).
50. Hedstrand, H. A study of middle-aged men with particular reference to risk factors for cardiovascular disease. *Ups J Med Sci Suppl* **19**, 1-61 (1975).
51. Raitakari, O.T. *et al.* Cohort profile: the cardiovascular risk in Young Finns Study. *Int J Epidemiol* **37**, 1220-6 (2008).
52. McAreavey, D. *et al.* Correlation of echocardiographic findings with cerebral infarction in elderly adults: the AGES-Reykjavik study. *Stroke* **41**, 2223-8 (2010).
53. Stanton, A. *et al.* An intensive phenotyping study to enable the future examination of genetic influences on hypertension-associated cardiovascular disease. *J Hum Hypertens* **15 Suppl 1**, S13-8 (2001).
54. Paczek, A. *et al.* Comparison of M-mode and two-dimensional echocardiographic algorithms used to estimate left ventricular mass: the Coronary Artery Risk Development in Young Adults Study. *J Am Soc Echocardiogr* **8**, 780-92 (1995).
55. Gardin, J.M. *et al.* Sex, age, and disease affect echocardiographic left ventricular mass and systolic function in the free-living elderly. The Cardiovascular Health Study. *Circulation* **91**, 1739-48 (1995).
56. Medenwald, D. *et al.* Inflammation and echocardiographic parameters of ventricular hypertrophy in a cohort with preserved cardiac function. *Open Heart* **1**, e000004 (2014).
57. Tiller, D. *et al.* Prevalence of symptomatic heart failure with reduced and with normal ejection fraction in an elderly general population-the CARLA study. *PLoS One* **8**, e59225 (2013).

58. Gardin, J.M. *et al.* Echocardiographic design of a multicenter investigation of free-living elderly subjects: the Cardiovascular Health Study. *J Am Soc Echocardiogr* **5**, 63-72 (1992).
59. Sundstrom, J. *et al.* Relations of plasma total TIMP-1 levels to cardiovascular risk factors and echocardiographic measures: the Framingham heart study. *Eur Heart J* **25**, 1509-16 (2004).
60. Taal, H.R. *et al.* Parental smoking during pregnancy and cardiovascular structures and function in childhood: the Generation R Study. *Int J Epidemiol* **42**, 1371-80 (2013).
61. Wild, P.S. *et al.* Distribution and categorization of left ventricular measurements in the general population: results from the population-based Gutenberg Heart Study. *Circ Cardiovasc Imaging* **3**, 604-13 (2010).
62. Devereux, R.B., Dahlof, B., Levy, D. & Pfeffer, M.A. Comparison of enalapril versus nifedipine to decrease left ventricular hypertrophy in systemic hypertension (the PRESERVE trial). *Am J Cardiol* **78**, 61-5 (1996).
63. Devereux, R.B. *et al.* Relations of Doppler stroke volume and its components to left ventricular stroke volume in normotensive and hypertensive American Indians: the Strong Heart Study. *Am J Hypertens* **10**, 619-28 (1997).
64. Devereux, R.B. *et al.* Relations of left ventricular mass to demographic and hemodynamic variables in American Indians: the Strong Heart Study. *Circulation* **96**, 1416-23 (1997).
65. Samdarshi, T.E. *et al.* Distribution and determinants of Doppler-derived diastolic flow indices in African Americans: the Jackson Heart Study (JHS). *Am Heart J* **158**, 209-16 (2009).
66. Wachter, R. *et al.* Impact of obstructive sleep apnoea on diastolic function. *Eur Respir J* **41**, 376-83 (2013).
67. Baessler, A. *et al.* Association of the Ghrelin receptor gene region with left ventricular hypertrophy in the general population: results of the MONICA/KORA Augsburg Echocardiographic Substudy. *Hypertension* **47**, 920-7 (2006).
68. Russo, C. *et al.* Race/ethnic disparities in left ventricular diastolic function in a triethnic community cohort. *Am Heart J* **160**, 152-8 (2010).

69. Sundstrom, J., Arnlov, J., Stolare, K. & Lind, L. Blood pressure-independent relations of left ventricular geometry to the metabolic syndrome and insulin resistance: a population-based study. *Heart* **94**, 874-8 (2008).
70. Kardys, I. *et al.* Echocardiographic parameters and all-cause mortality: the Rotterdam Study. *Int J Cardiol* **133**, 198-204 (2009).
71. Dörr, M. *et al.* The association of thyroid function with cardiac mass and left ventricular hypertrophy. *J Clin Endocrinol Metab* **90**, 673-7 (2005).
72. Andren, B., Lind, L., Hedenstierna, G. & Lithell, H. Left ventricular hypertrophy and geometry in a population sample of elderly males. *Eur Heart J* **17**, 1800-7 (1996).
73. McMahon, D.M., Liu, J., Zhang, H., Torres, M.E. & Best, R.G. Maternal obesity, folate intake, and neural tube defects in offspring. *Birth Defects Res Part A Clin Mol Teratol* **97**, 115-122 (2013).

## **Consortium Details**

AortaGen Consortium Members: Gary F. Mitchell, Germaine C. Verwoert, Kirill V. Tarasov, Aaron Isaacs, Albert V. Smith, Yasmin, Ernst R. Rietzschel, Toshiko Tanaka, Yongmei Liu, Afshin Parsa, Samer S. Najjar, Kevin M. O'Shaughnessy, Sigurdur Sigurdsson, Marc L. De Buyzere, Martin G. Larson, Mark P.S. Sie, Jeanette S. Andrews, Wendy S. Post, Francesco U.S. Mattace-Raso, Carmel M. McEniery, Gudny Eiriksdottir, Patrick Segers, Ramachandran S. Vasan, Marie Josee E. van Rijn, Timothy D. Howard, Patrick F. McArdle, Abbas Dehghan, Elizabeth S. Jewell, Stephen J. Newhouse, Sofie Bekaert, Naomi M. Hamburg, Anne B. Newman, Albert Hofman, Angelo Scuteri, Dirk De Bacquer, Mohammad Arfan Ikram, Bruce M. Psaty, Christian Fuchsberger, Matthias Olden, Louise V. Wain, Paul Elliott, Nicholas L. Smith, Janine F. Felix, Jeanette Erdmann, Joseph A. Vita, Kim Sutton-Tyrrell, Eric J.G. Sijbrands, Serena Sanna, Lenore J. Launer, Tim De Meyer, Andrew D. Johnson, Anna F.C. Schut, David M. Herrington, Fernando Rivadeneira, Manuela Uda, Ian B. Wilkinson, Thor Aspelund, Thierry C. Gillebert, Luc Van Bortel, Emelia J. Benjamin, Ben A. Oostra, Jingzhong Ding, Quince Gibson, André G. Uitterlinden, Gonçalo R. Abecasis, John R. Cockcroft, Vilmundur Gudnason, Guy G. De Backer, Luigi Ferrucci, Tamara B. Harris, Alan R. Shuldiner, Cornelia M. van Duijn, Daniel Levy, Edward G. Lakatta, Jacqueline C.M. Witteman. Affiliations at the time of the original publication: Cardiovascular Engineering, Inc, Norwood, MA (G.F.M.); the Department of Epidemiology (G.C.V., A.D., A.H., M.A.I., J.F.F., F.R., A.G.U., J.C.M.W.), Department of Internal Medicine (G.C.V., F.U.S.M., E.J.G.S., F.R., A.G.U.), Genetic Epidemiology Unit (A.I., M.P.S.S., M.J.E.V.R., A.F.C.S., B.A.O., C.M.V.D.), Erasmus Medical Center, Rotterdam, The Netherlands; the Netherlands Consortium on Healthy Aging, The Netherlands (G.C.V., F.U.S.M., A.D., M.A.I., J.F.F., F.R., A.G.U., J.C.M.W.); Laboratory of Cardiovascular Science (K.V.T., S.S.N., A.S., E.G.L.), Laboratory of Genetics (K.V.T.), Clinical Research Branch (T.T., L.F.), Laboratory of Epidemiology, Demography, and Biometry (L.J.L., T.B.H.), Intramural Research Program,

National Institute on Aging, NIH, Baltimore, MD; Centre for Medical Systems Biology, Leiden, The Netherlands (A.I., B.A.O., C.M.V.D.); Icelandic Heart Association, Kopavogur, Iceland (A.V.S., S.S., G.E., T.A., V.G.); University of Iceland, Reykjavik, Iceland (A.V.S., T.A., V.G.); Clinical Pharmacology Unit, University of Cambridge, Addenbrooke's Hospital, Cambridge, United Kingdom (Y., K.M.O., C.M.M., S.J.N., I.B.W.); Department of Cardiology, Ghent University Hospital, Belgium (E.R.R., T.C.G., M.L.D.B.); the Department of Internal Medicine (E.R.R.), Department of Public Health (D.D.B., G.G.D.B.), bioMMeda (Biofluid, Tissue, and Solid Mechanics for Medical Applications), Institute Biomedical Technology (P.S.), the Department of Molecular Biotechnology (Faculty of Bioscience Engineering) (T.D.M.), the Clinical Research Center (S.B.), the Heymans Institute of Pharmacology (L.V.B.), Ghent University, Belgium; the Department of Epidemiology and Prevention (Y.L.), the Department of Biostatistical Sciences, Division of Public Health Sciences (J.S.A.), the Department of Cardiology (D.M.H.), Sticht Center on Aging (J.D.), Wake Forest University School of Medicine, Winston-Salem, NC; University of Maryland School of Medicine, Baltimore, MD (A.P., P.F.M., Q.G., A.R.S.); the Division of Cardiology, Washington Hospital Center, Washington, DC (S.S.N.); the Department of Mathematics and Statistics, Boston University, Boston, MA (M.G.L.); NHLBI's Framingham Study, Framingham, MA (M.G.L., R.S.V., M.O., A.D.J., E.J.B., D.L.); Division of Cardiology, The Johns Hopkins University School of Medicine, Baltimore, MD (W.S.P.); Evans Department of Medicine, Whitaker Cardiovascular Institute, and Preventive Medicine and Cardiology Sections, Boston University School of Medicine, Boston, MA (R.S.V., N.M.H., J.A.V., E.J.B.); Center for Genomics and Personalized Medicine Research, Wake Forest School of Medicine, Winston-Salem, NC (T.D.H.); Center for Statistical Genetics, Department of Biostatistics, University of Michigan, Ann Arbor, MI (E.S.J., C.F., G.R.A.); the Department of Epidemiology, Graduate School of Public Health, University of Pittsburgh, Pittsburgh, PA (A.B.N., K.S.T.); Cardiovascular Health Study, Departments of Epidemiology (B.M.P., N.L.S.), Medicine and Health Services (B.M.P.), University of Washington, Seattle, WA; Group Health Research Institute, Group

Health, Seattle, WA (B.M.P., N.L.S.); Seattle Epidemiologic Research and Information Center of the Department of VA Office of Research and Development, Seattle, WA (N.L.S.); the Department of Internal Medicine II, Department of Epidemiology and Preventive Medicine, University Medical Center Regensburg, Regensburg, Germany (M.O.); the Department of Health Sciences, University of Leicester, Leicester, United Kingdom (L.V.W.); MRC-HPA Center for Environment and Health, School of Public Health, Imperial College London, St Mary's Campus, London, United Kingdom (P.E.); German Cancer Research Center (DKFZ), Division of Clinical Epidemiology and Aging Research, Heidelberg, Germany (J.F.F.); and Universität zu Lübeck, Medizinische Klinik II, Lübeck, Germany (J.E.); Istituto di Neurogenetica e Neurofarmacologia, Consiglio Nazionale delle Ricerche, Cittadella Universitaria di Monseratto, Monserrato, Cagliari, Italy (S.S., M.U.); Department of Cardiology, Wales Heart Research Institute, Cardiff University, Cardiff, United Kingdom (J.R.C.); Geriatric Research and Education Clinical Center, VA Medical Center, Baltimore, MD (A.R.S.); Center for Population Studies, and the Division of Intramural Research of the National Heart, Lung, and Blood Institute, National Institutes of Health, Bethesda, MD (A.D.J., D.L.)

CHARGE-HF Consortium Members: Nicholas L. Smith, Janine F. Felix, Alanna C. Morrison, Serkalem Demissie, Nicole L. Glazer, Laura R. Loehr, L. Adrienne Cupples, Abbas Dehghan, Thomas Lumley, Wayne D. Rosamond, Wolfgang Lieb, Fernando Rivadeneira, Joshua C. Bis, Aaron R. Folsom, Emelia Benjamin, Yurii S. Aulchenko, Talin Haritunians, David Couper, Joanne Murabito, Ying A. Wang, Bruno H. Stricker, John S. Gottdiener, Patricia P. Chang, Thomas J. Wang, Kenneth M. Rice, Albert Hofman, Susan R. Heckbert, Ervin R. Fox, Christopher J. O'Donnell, Andre G. Uitterlinden, Jerome I. Rotter, James T. Willerson, Daniel Levy, Cornelia M. van Duijn, Bruce M. Psaty, Jacqueline C.M. Witteman, Eric Boerwinkle, Ramachandran S. Vasan. Affiliations at the time of the original publication: Cardiovascular Health Study: Departments of Epidemiology (N.L.S., S.R.H., B.M.P.), Medicine (N.L.G., J.C.B.,

B.M.P.), Biostatistics (T.L., K.M.R.), and Health Services (B.M.P.) University of Washington, Seattle, Wash.; Seattle Epidemiologic Research and Information Center of the Department of Veterans Affairs Office of Research and Development (N.L.S.), Seattle, Wash.; Group Health Research Institute (S.R.H., B.M.P., N.L.S.) Group Health, Seattle, Wash.; and Department of Cardiology (J.S.G.), University of Maryland, Baltimore, Md; Medical Genetics Institute (T.H., J.I.R.), Cedars-Sinai Medical Center, Los Angeles, Calif; Artherosclerosis Risk in Communities Study: University of Texas at Houston Health Science Center (A.C.M., E.B., J.T.W.), Houston, Tex.; Departments of Medicine (L.R.L., P.P.C.), Biostatistics (D.C.), and Epidemiology (W.D.R., L.R.L.), University of North Carolina at Chapel Hill; National Institute of Environmental Health Sciences (L.R.L.), Research Triangle Park, N.C., University of Minnesota School of Public Health, Division of Epidemiology and Community Health, School of Public Health (A.R.F.), Minneapolis, Minn.; Department of Medicine (E.R.F.), University of Mississippi Medical Center, Jackson, Miss; Texas Heart Institute (J.T.W.), Houston, Tex; Framingham Heart Study, Department of Biostatistics (S.D., L.A.C., Y.A.W.), Boston University School of Public Health, Boston, Mass.; Sections of Preventive Medicine and Cardiology (R.S.V.), Boston University School of Medicine, Boston, Mass.; National Heart Lung and Blood Institute (C.J.O., D.L.), Bethesda, MD; Massachusetts General Hospital (T.J.W., C.J.O.), Harvard Medical School, Boston, Mass.; and Framingham Heart Study (L.A.C., W.L., E.B., J.M., T.J.W., C.J.O., D.L., R.S.V.), Framingham, Mass; Rotterdam Study: Departments of Epidemiology (J.F.F., A.D., Y.S.A., B.H.S., A.H., C.M.v.D., J.C.M.W.) and Internal Medicine (F.R., A.G.U.), Erasmus MC, Rotterdam, the Netherlands; and Member of the Netherlands Consortium on Healthy Aging, Leiden, The Netherlands (J.F.F., J.C.M.W.)

KNHI Investigators: Heike Bickeböller, Gerd Hasenfuss, Anke Kockskämper, Albrecht Schmidt, Melanie Sohns. Affiliations: Department of Genetic Epidemiology, University Medical Center, Georg-August University, Göttingen, Germany (H.B., M.S.), Department of Cardiology and Pneumology, University Medical Center of Göttingen, Georg-August University, Göttingen,

Germany (G.H., A.K.), DZHK (German Center for Cardiovascular Research), partner site  
Goettingen, Germany (G.H.), Medizinische Klinik II - Kardiologie und Angiologie, Agaplesion  
EKH Mittelhessen, Giessen, Germany (A.K.), Department of Cardiology, Medical University  
Graz, Graz, Austria (A.S.)

STROBE Statement—Checklist of items that should be included in reports of *cohort studies*

|                           | Item No | Recommendation                                                                                                                                                                                                                                                                                                                                                                                                |
|---------------------------|---------|---------------------------------------------------------------------------------------------------------------------------------------------------------------------------------------------------------------------------------------------------------------------------------------------------------------------------------------------------------------------------------------------------------------|
| <b>Title and abstract</b> | 1       | (a) Indicate the study's design with a commonly used term in the title or the abstract<br>(b) Provide in the abstract an informative and balanced summary of what was done and what was found                                                                                                                                                                                                                 |
| <b>Introduction</b>       |         |                                                                                                                                                                                                                                                                                                                                                                                                               |
| Background/rationale      | 2       | Explain the scientific background and rationale for the investigation being reported                                                                                                                                                                                                                                                                                                                          |
| Objectives                | 3       | State specific objectives, including any prespecified hypotheses                                                                                                                                                                                                                                                                                                                                              |
| <b>Methods</b>            |         |                                                                                                                                                                                                                                                                                                                                                                                                               |
| Study design              | 4       | Present key elements of study design early in the paper                                                                                                                                                                                                                                                                                                                                                       |
| Setting                   | 5       | Describe the setting, locations, and relevant dates, including periods of recruitment, exposure, follow-up, and data collection                                                                                                                                                                                                                                                                               |
| Participants              | 6       | (a) Give the eligibility criteria, and the sources and methods of selection of participants. Describe methods of follow-up<br>(b) For matched studies, give matching criteria and number of exposed and unexposed                                                                                                                                                                                             |
| Variables                 | 7       | Clearly define all outcomes, exposures, predictors, potential confounders, and effect modifiers. Give diagnostic criteria, if applicable                                                                                                                                                                                                                                                                      |
| Data sources/measurement  | 8*      | For each variable of interest, give sources of data and details of methods of assessment (measurement). Describe comparability of assessment methods if there is more than one group                                                                                                                                                                                                                          |
| Bias                      | 9       | Describe any efforts to address potential sources of bias                                                                                                                                                                                                                                                                                                                                                     |
| Study size                | 10      | Explain how the study size was arrived at                                                                                                                                                                                                                                                                                                                                                                     |
| Quantitative variables    | 11      | Explain how quantitative variables were handled in the analyses. If applicable, describe which groupings were chosen and why                                                                                                                                                                                                                                                                                  |
| Statistical methods       | 12      | (a) Describe all statistical methods, including those used to control for confounding<br>(b) Describe any methods used to examine subgroups and interactions<br>(c) Explain how missing data were addressed<br>(d) If applicable, explain how loss to follow-up was addressed<br>(e) Describe any sensitivity analyses                                                                                        |
| <b>Results</b>            |         |                                                                                                                                                                                                                                                                                                                                                                                                               |
| Participants              | 13*     | (a) Report numbers of individuals at each stage of study—eg numbers potentially eligible, examined for eligibility, confirmed eligible, included in the study, completing follow-up, and analysed<br>(b) Give reasons for non-participation at each stage<br>(c) Consider use of a flow diagram                                                                                                               |
| Descriptive data          | 14*     | (a) Give characteristics of study participants (eg demographic, clinical, social) and information on exposures and potential confounders<br>(b) Indicate number of participants with missing data for each variable of interest<br>(c) Summarise follow-up time (eg, average and total amount)                                                                                                                |
| Outcome data              | 15*     | Report numbers of outcome events or summary measures over time                                                                                                                                                                                                                                                                                                                                                |
| Main results              | 16      | (a) Give unadjusted estimates and, if applicable, confounder-adjusted estimates and their precision (eg, 95% confidence interval). Make clear which confounders were adjusted for and why they were included<br>(b) Report category boundaries when continuous variables were categorized<br>(c) If relevant, consider translating estimates of relative risk into absolute risk for a meaningful time period |

|                          |    |                                                                                                                                                                            |
|--------------------------|----|----------------------------------------------------------------------------------------------------------------------------------------------------------------------------|
| Other analyses           | 17 | Report other analyses done—eg analyses of subgroups and interactions, and sensitivity analyses                                                                             |
| <b>Discussion</b>        |    |                                                                                                                                                                            |
| Key results              | 18 | Summarise key results with reference to study objectives                                                                                                                   |
| Limitations              | 19 | Discuss limitations of the study, taking into account sources of potential bias or imprecision. Discuss both direction and magnitude of any potential bias                 |
| Interpretation           | 20 | Give a cautious overall interpretation of results considering objectives, limitations, multiplicity of analyses, results from similar studies, and other relevant evidence |
| Generalisability         | 21 | Discuss the generalisability (external validity) of the study results                                                                                                      |
| <b>Other information</b> |    |                                                                                                                                                                            |
| Funding                  | 22 | Give the source of funding and the role of the funders for the present study and, if applicable, for the original study on which the present article is based              |

\*Give information separately for exposed and unexposed groups.

**Note:** An Explanation and Elaboration article discusses each checklist item and gives methodological background and published examples of transparent reporting. The STROBE checklist is best used in conjunction with this article (freely available on the Web sites of PLoS Medicine at <http://www.plosmedicine.org/>, Annals of Internal Medicine at <http://www.annals.org/>, and Epidemiology at <http://www.epidem.com/>). Information on the STROBE Initiative is available at <http://www.strobe-statement.org>.
